# Supplementary material for: Comparative proteomics of Rhizopus delemar ATCC 20344 unravels the role of amino acid catabolism in fumarate accumulation
Source: PeerJ. 2017 Mar 30;5:e3133. doi: 10.7717/peerj.3133 (PMC5376114; doi:10.7717/peerj.3133)
Supplement: Table S4 — Relative protein abundance and average nucleotide coverage of enzymes identified in the proteomics data. Note that only enzymes that could be predicted by PRIAM are listed. [file peerj-05-3133-s004.xlsx]

## Sheet: Sheet1
PRIAM predictable EC number	Protein ID (ATCC 20344 and RA 99-880)	consensus protein ID*	proteomics (relative abundance [% a.u.]) ± sd							transcriptomics (average nucleotide count over full contig)
			aerobic			anaerobic			log2FC aerobic/anaerobic	aerobic	anaerobic	log2FC aerobic/anaerobic
3.4.11.21	contig-100_1146_-1_max_po1	Rd_00001	0.668851	±	0.0387044	0.286724	±	0.0170713	1.22202	215.738	122.895	0.811848
3.4.11.21	contig-100_2413_+0_max_po1	Rd_00002	0.307207	±	0.0322623	0.0782859	±	0.0137536	1.97239	287.529	149.724	0.941405
3.4.11.21	EIE78284.1	Rd_00003	0.820782	±	0.0248414	0.402835	±	0.0202769	1.02681	167.93	97.0801	0.790617
3.4.11.21	EIE88868.1	Rd_00004	0.454877	±	0.0111581	0.105164	±	0.0172897	2.11283	281.103	150.723	0.899194
1.1.5.3	EIE84145.1	Rd_00005	0.00344143	±	0.000846355	0.00310146	±	0.000776182	0.150058	47.0315	18.426	1.35188
1.1.5.3	EIE89069.1	Rd_00006	0.00344143	±	0.000846355	0.00310146	±	0.000776182	0.150058	43.0845	12.6745	1.76524
1.17.4.1	contig-100_10_+0_max_po1	Rd_00007	n.d.	±	0	n.d.	±	0	-	85.4308	47.545	0.845463
1.17.4.1	contig-100_4933_+2_max_po1	Rd_00008	0.283213	±	0.00729716	0.15435	±	0.046854	0.875678	275.787	232.964	0.243446
1.17.4.1	contig-100_5798_-1_max_po1	Rd_00009	0.00739918	±	0.00124275	0.00841641	±	0.0044802	-0.185839	53.7023	47.5081	0.176813
1.17.4.1	EIE80942.1	Rd_00010	0.00683101	±	0.00109649	0.0098125	±	0.00522785	-0.522522	58.2812	48.66	0.260293
1.17.4.1	EIE84174.1	Rd_00011	n.d.	±	0	n.d.	±	0	-	89.6961	56.557	0.665341
1.17.4.1	EIE87340.1	Rd_00012	0.357767	±	0.0198092	0.216525	±	0.0737054	0.724485	256.466	217.278	0.239221
1.17.4.1	EIE91344.1	Rd_00013	n.d.	±	0	n.d.	±	0	-	45.7338	22.0011	1.05569
3.6.3.14	contig-100_12292_-1_max_po1	Rd_00014	n.d.	±	0	n.d.	±	0	-	5.01404	69.2581	-3.78794
3.6.3.14	EIE76034.1	Rd_00015	0.891666	±	0.0296135	0.534967	±	0.0597155	0.737054	474.29	253.184	0.905582
3.6.3.14	EIE76581.1	Rd_00016	0.753348	±	0.0323346	0.400707	±	0.0575456	0.910767	364.244	276.123	0.399597
3.6.3.14	EIE77194.1	Rd_00017	0.0634726	±	0.00267973	0.030069	±	0.00399695	1.07786	218.176	187.18	0.221066
3.6.3.14	EIE78960.1	Rd_00018	0.265835	±	0.02444	0.131351	±	0.0245483	1.01711	211.351	157.293	0.426186
3.6.3.14	EIE80778.1	Rd_00019	0.00858748	±	0.00063926	0.00162358	±	2.81906e-05	2.40306	470.288	248.062	0.922846
3.6.3.14	EIE81002.1	Rd_00020	0.00858748	±	0.00063926	0.00162358	±	2.81906e-05	2.40306	270.023	163.846	0.72074
3.6.3.14	EIE83557.1	Rd_00021	0.753348	±	0.0323346	0.400707	±	0.0575456	0.910767	619.671	318.422	0.960561
3.6.3.14	EIE91685.1	Rd_00022	0.753348	±	0.0323346	0.400707	±	0.0575456	0.910767	504.924	312.759	0.691017
3.6.3.14	EIE92279.1	Rd_00023	0.891666	±	0.0296135	0.534967	±	0.0597155	0.737054	224.599	158.86	0.49959
2.6.1.52	contig-100_3869_+0_max_po1	Rd_00024	0.0166542	±	0.00321085	0.0118155	±	0.00665352	0.495213	212.649	387	-0.863863
2.6.1.52	EIE78671.1	Rd_00025	0.0243693	±	0.000827805	0.0165297	±	0.0101338	0.560006	219.698	399.862	-0.863979
6.3.2.17	contig-100_3525_+1_max_po1	Rd_00026	n.d.	±	0	n.d.	±	0	-	23.1479	16.4665	0.491346
6.3.2.17	EIE80198.1	Rd_00027	n.d.	±	0	n.d.	±	0	-	160.814	93.9914	0.774793
6.3.2.17	EIE85404.1	Rd_00028	n.d.	±	0	n.d.	±	0	-	21.9399	15.9725	0.457964
6.3.2.17	EIE92432.1	Rd_00029	n.d.	±	0	n.d.	±	0	-	11.2491	10.0206	0.166844
3.6.1.19	contig-100_7719_+0_max_po1	Rd_00030	n.d.	±	0	n.d.	±	0	-	45.679	58.5847	-0.358993
3.6.1.19	EIE79388.1	Rd_00031	n.d.	±	0	n.d.	±	0	-	44.2822	39.5991	0.161262
3.6.1.19	EIE85119.1	Rd_00032	n.d.	±	0	n.d.	±	0	-	42.7447	60.8055	-0.508455
2.7.7.19	contig-100_2017_+2_max_po1	Rd_00033	n.d.	±	0	n.d.	±	0	-	83.5648	40.5183	1.04432
2.7.7.19	EIE77401.1	Rd_00034	n.d.	±	0	n.d.	±	0	-	32.0705	10.6609	1.58892
2.7.7.19	EIE80126.1	Rd_00035	n.d.	±	0	n.d.	±	0	-	81.0785	37.9878	1.09378
2.7.7.19	EIE84967.1	Rd_00036	n.d.	±	0	n.d.	±	0	-	15.1622	15.8368	-0.0628039
2.7.7.18	contig-100_1132_-1_max_po1	Rd_00037	0.0311305	±	0.00267732	0.0317284	±	0.00418733	-0.0274434	192.003	139.375	0.46216
2.7.7.18	contig-100_6599_+0_max_po1	Rd_00038	0.0107017	±	0.00100151	0	±	0	100	160.262	102.357	0.646821
2.7.7.14	contig-100_4239_-0_max_po1	Rd_00039	n.d.	±	0	n.d.	±	0	-	129.52	96.8107	0.419939
2.7.7.14	EIE76135.1	Rd_00040	n.d.	±	0	n.d.	±	0	-	104.481	69.4269	0.589672
2.7.7.13	contig-100_3885_+1_max_po1	Rd_00041	n.d.	±	0	n.d.	±	0	-	139.403	98.6031	0.499552
2.7.7.13	EIE79690.1	Rd_00042	n.d.	±	0	n.d.	±	0	-	348.575	314.572	0.148079
2.7.7.13	EIE84524.1	Rd_00043	n.d.	±	0	n.d.	±	0	-	347.37	169.257	1.03726
2.7.7.13	EIE88320.1	Rd_00044	n.d.	±	0	n.d.	±	0	-	286.834	244.363	0.231191
2.7.7.12	contig-100_4259_+1_max_po1	Rd_00045	n.d.	±	0	n.d.	±	0	-	28.5426	19.8268	0.525666
2.7.7.12	EIE78660.1	Rd_00046	n.d.	±	0	n.d.	±	0	-	29.1785	20.5861	0.503233
2.7.7.48	EIE82649.1	Rd_00047	n.d.	±	0	n.d.	±	0	-	13.1672	14.4428	-0.133408
2.7.7.49	EIE75994.1	Rd_00048	n.d.	±	0	n.d.	±	0	-	n.d.	n.d.	-
2.7.7.49	EIE77991.1	Rd_00049	n.d.	±	0	n.d.	±	0	-	0.372285	0.634646	-0.769543
2.7.7.49	EIE78845.1	Rd_00050	n.d.	±	0	n.d.	±	0	-	0.709632	0.828933	-0.224185
2.7.7.49	EIE84465.1	Rd_00051	n.d.	±	0	n.d.	±	0	-	0.517705	0.797182	-0.622777
2.7.7.49	EIE85523.1	Rd_00052	n.d.	±	0	n.d.	±	0	-	6.90053	5.88168	0.230479
2.7.7.49	EIE86829.1	Rd_00053	n.d.	±	0	n.d.	±	0	-	0.536137	0.7308	-0.446875
2.1.1.220	contig-100_5659_-2_max_po1	Rd_00054	n.d.	±	0	n.d.	±	0	-	54.3084	34.4649	0.656046
2.1.1.220	EIE88899.1	Rd_00055	n.d.	±	0	n.d.	±	0	-	56.4994	33.4326	0.756979
2.1.1.222	contig-100_1717_+0_max_po1	Rd_00056	n.d.	±	0	n.d.	±	0	-	63.5369	33.8056	0.910333
2.5.1.78	contig-100_4095_+0_max_po1	Rd_00057	0	±	0	0.0297948	±	0.00710155	-100	233.158	358.75	-0.62167
2.5.1.78	EIE83201.1	Rd_00058	0	±	0	0.0220171	±	0.000841058	-100	153.753	334.871	-1.12299
2.5.1.78	EIE87880.1	Rd_00059	0	±	0	0.0220171	±	0.000841058	-100	140.076	196.776	-0.490346
1.8.5.1	contig-100_4287_-1_max_po1	Rd_00060	n.d.	±	0	n.d.	±	0	-	288.935	215.995	0.419744
1.8.5.1	EIE88978.1	Rd_00061	n.d.	±	0	n.d.	±	0	-	30.6268	13.07	1.22853
1.5.1.3	contig-100_8452_+0_max_po1	Rd_00062	n.d.	±	0	n.d.	±	0	-	121.633	111.9	0.120321
1.5.1.3	EIE80550.1	Rd_00063	n.d.	±	0	n.d.	±	0	-	129.811	117.664	0.141742
2.1.1.41	contig-100_8084_+1_max_po1	Rd_00064	n.d.	±	0	n.d.	±	0	-	405.015	250.669	0.692191
2.1.1.41	EIE91056.1	Rd_00065	n.d.	±	0	n.d.	±	0	-	238.171	2011.85	-3.07845
2.1.1.41	EIE91338.1	Rd_00066	0	±	0	0.015249	±	0.00505252	-100	365.652	254.647	0.521969
2.1.1.43	contig-100_1921_-0_max_po1	Rd_00067	n.d.	±	0	n.d.	±	0	-	31.8158	19.7013	0.691449
2.1.1.43	EIE76594.1	Rd_00068	n.d.	±	0	n.d.	±	0	-	125.742	94.0219	0.419397
2.1.1.43	EIE76676.1	Rd_00069	n.d.	±	0	n.d.	±	0	-	71.3581	53.219	0.423135
2.1.1.43	EIE77564.1	Rd_00070	n.d.	±	0	n.d.	±	0	-	36.0796	35.5173	0.0226621
2.1.1.43	EIE84061.1	Rd_00071	n.d.	±	0	n.d.	±	0	-	22.2357	13.3525	0.735764
2.1.1.43	EIE89418.1	Rd_00072	n.d.	±	0	n.d.	±	0	-	24.8889	12.4594	0.99827
2.1.1.43	EIE89509.1	Rd_00073	n.d.	±	0	n.d.	±	0	-	20.5812	10.1432	1.02081
2.1.1.43	EIE89518.1	Rd_00074	n.d.	±	0	n.d.	±	0	-	24.3817	14.9342	0.707179
2.1.1.43	EIE91360.1	Rd_00075	n.d.	±	0	n.d.	±	0	-	31.7443	23.9674	0.405427
2.1.1.45	contig-100_5934_+2_max_po1	Rd_00076	n.d.	±	0	n.d.	±	0	-	55.5535	39.6118	0.487948
2.1.1.45	EIE79369.1	Rd_00077	n.d.	±	0	n.d.	±	0	-	58.4767	41.5049	0.494579
2.7.1.50	contig-100_2726_-2_max_po1	Rd_00078	0.0200892	±	0.00300557	0.00577017	±	0.000798748	1.79974	142.853	272.957	-0.934138
2.7.1.50	EIE92513.1	Rd_00079	0.0278301	±	0.00431388	0.00878095	±	0.000245521	1.6642	145.881	274.407	-0.911528
1.14.99.29	contig-100_8123_+2_max_po1	Rd_00080	n.d.	±	0	n.d.	±	0	-	233.039	546.135	-1.22868
1.14.99.29	EIE85586.1	Rd_00081	n.d.	±	0	n.d.	±	0	-	273.652	580.772	-1.08563
2.1.1.211	contig-100_3635_-2_max_po1	Rd_00082	n.d.	±	0	n.d.	±	0	-	9.88077	6.54427	0.594391
2.1.1.216	contig-100_3378_+0_max_po1	Rd_00083	n.d.	±	0	n.d.	±	0	-	43.2124	25.1733	0.77955
2.1.1.216	EIE77892.1	Rd_00084	n.d.	±	0	n.d.	±	0	-	43.6154	24.5709	0.827889
2.1.1.216	EIE89415.1	Rd_00085	n.d.	±	0	n.d.	±	0	-	12.2466	19.0187	-0.635033
2.3.1.97	contig-100_643_+1_max_po1	Rd_00086	n.d.	±	0	n.d.	±	0	-	387.913	263.825	0.556152
2.3.1.97	EIE82157.1	Rd_00087	n.d.	±	0	n.d.	±	0	-	248.888	243.725	0.030245
4.2.1.17	contig-100_5775_-2_max_po1	Rd_00088	0.0503925	±	0.0199816	0.04304	±	0.00842465	0.227532	331.398	210.78	0.652827
4.2.1.17	EIE81398.1	Rd_00089	0.0728808	±	0.0281944	0.0471026	±	0.00113468	0.629734	357.56	223.063	0.680737
2.1.1.107	contig-100_2831_-0_max_po1	Rd_00090	n.d.	±	0	n.d.	±	0	-	8.53125	27.1743	-1.67141
2.1.1.107	EIE82541.1	Rd_00091	n.d.	±	0	n.d.	±	0	-	19.064	15.0721	0.33897
2.1.1.107	EIE84695.1	Rd_00092	n.d.	±	0	n.d.	±	0	-	8.47763	26.162	-1.62574
1.14.13.70	contig-100_2602_-2_max_po1	Rd_00093	0	±	0	0.0859175	±	0.0616891	-100	159.52	2572.46	-4.01134
1.14.13.70	EIE87079.1	Rd_00094	n.d.	±	0	n.d.	±	0	-	210.052	308.209	-0.553166
1.14.13.70	EIE91884.1	Rd_00095	0	±	0	0.0829788	±	0.0442431	-100	160.796	2591.2	-4.01032
1.14.13.72	contig-100_5403_+0_max_po1	Rd_00096	0	±	0	0.0835493	±	0.00640623	-100	162.378	2540.71	-3.96781
1.14.13.72	contig-100_5614_-1_max_po1	Rd_00097	0.0116706	±	0.000633832	0.0454206	±	0.00184712	-1.96047	447.399	947.079	-1.08192
1.14.13.72	EIE75922.1	Rd_00098	0.012865	±	0.00129589	0.0626028	±	0.00854927	-2.28278	469.433	1007.36	-1.10159
1.14.13.72	EIE82882.1	Rd_00099	0.00756486	±	0.00542537	0.131887	±	0.00989041	-4.12384	164.528	2682.39	-4.02711
3.5.4.19	contig-100_811_-1_max_po1	Rd_00100	0.0248467	±	0.00155587	0.031697	±	0.0041586	-0.351293	50.3359	108.783	-1.11179
3.5.4.19	EIE79437.1	Rd_00101	0.0400316	±	0.00500706	0.0406751	±	0.00417117	-0.0230073	51.1167	108.851	-1.09049
3.5.4.12	contig-100_4610_-2_max_po1	Rd_00102	n.d.	±	0	n.d.	±	0	-	64.2758	53.0264	0.277565
3.5.4.10	contig-100_1586_-0_max_po2	Rd_00103	0.0985669	±	0.000449516	0.062011	±	0.0034784	0.668579	212.536	193.868	0.132632
3.5.4.10	EIE91822.1	Rd_00104	0.127014	±	0.00235066	0.0797238	±	0.0048181	0.671908	226.421	208.617	0.118151
1.14.99.3	contig-100_1708_-1_max_po1	Rd_00105	0	±	0	0.00771364	±	0.00302856	-100	106.295	140.427	-0.401741
1.14.99.3	EIE82621.1	Rd_00106	0	±	0	0.0139403	±	0.0026768	-100	131.04	186.218	-0.506992
1.14.99.3	EIE88605.1	Rd_00107	n.d.	±	0	n.d.	±	0	-	15.3627	16.9493	-0.141794
3.4.13.19	contig-100_950_-0_max_po1	Rd_00108	0.0409516	±	0.0131581	0	±	0	100	377.512	225.053	0.746257
3.4.13.19	EIE87083.1	Rd_00109	0.019427	±	0.010485	0	±	0	100	254.599	138.845	0.874758
2.7.7.23	contig-100_2275_-2_max_po1	Rd_00110	0.0230012	±	0.00864503	0.0234154	±	0.00235085	-0.0257466	344.751	201.114	0.777541
2.7.7.23	contig-100_2760_-2_max_po1	Rd_00111	0.0230012	±	0.00864503	0.0234154	±	0.00235085	-0.0257466	84.9253	53.783	0.659046
2.7.7.23	EIE77756.1	Rd_00112	0	±	0	0.0339853	±	0.00260411	-100	86.4504	53.727	0.686226
2.7.7.23	EIE87575.1	Rd_00113	0.0675135	±	0.0215331	0.0444298	±	0.00600497	0.603648	356.822	208.132	0.777704
4.4.1.17	contig-100_5913_+0_max_po1	Rd_00114	n.d.	±	0	n.d.	±	0	-	66.5254	55.6954	0.256346
2.1.1.56	contig-100_5697_+2_max_po1	Rd_00115	n.d.	±	0	n.d.	±	0	-	30.328	23.3953	0.374433
2.1.1.56	EIE77819.1	Rd_00116	n.d.	±	0	n.d.	±	0	-	37.9637	30.5899	0.311566
1.11.1.6	contig-100_2667_+2_max_po1	Rd_00117	n.d.	±	0	n.d.	±	0	-	75.5098	34.6315	1.12458
1.11.1.6	EIE85094.1	Rd_00118	n.d.	±	0	n.d.	±	0	-	78.088	35.5255	1.13624
3.1.4.4	contig-100_1_+1_max_po3	Rd_00119	n.d.	±	0	n.d.	±	0	-	137.667	107.098	0.362253
3.1.4.4	contig-100_1904_+0_max_po1	Rd_00120	0.0209484	±	0.00103921	0.024106	±	0.00575167	-0.202556	257.03	271.355	-0.0782453
3.1.4.4	EIE77377.1	Rd_00121	0.00734699	±	0.000375521	0	±	0	100	116.119	68.7069	0.757075
3.1.4.4	EIE79023.1	Rd_00122	0.0195281	±	0.00541797	0.0225327	±	0.00283201	-0.206466	388.239	348.953	0.153916
3.1.4.4	EIE83606.1	Rd_00123	n.d.	±	0	n.d.	±	0	-	18.9079	8.83962	1.09693
3.1.4.4	EIE85686.1	Rd_00124	n.d.	±	0	n.d.	±	0	-	19.8091	9.01043	1.1365
1.3.99.30	EIE91958.1	Rd_00125	n.d.	±	0	n.d.	±	0	-	n.d.	n.d.	-
4.1.1.15	contig-100_2843_+1_max_po1	Rd_00126	n.d.	±	0	n.d.	±	0	-	245.954	297.089	-0.272506
4.1.1.15	contig-100_4564_-1_max_po1	Rd_00127	0.236492	±	0.0418075	0.0153424	±	0.00706406	3.94619	2016.13	1135.8	0.827873
4.1.1.15	contig-100_4793_+1_max_po1	Rd_00128	0.16057	±	0.125704	0.0392329	±	0.011198	2.03306	1346.98	1920.21	-0.511529
4.1.1.15	EIE89307.1	Rd_00129	0.313556	±	0.0352305	0.031199	±	0.0010731	3.32915	2088.37	1171.27	0.834312
4.1.1.17	contig-100_2743_+0_max_po2	Rd_00130	n.d.	±	0	n.d.	±	0	-	244.054	157.843	0.628708
4.1.1.17	EIE78046.1	Rd_00131	n.d.	±	0	n.d.	±	0	-	110.613	65.6534	0.752573
4.1.1.17	EIE86937.1	Rd_00132	n.d.	±	0	n.d.	±	0	-	262.578	167.637	0.647405
1.1.1.44	contig-100_2912_-1_max_po1	Rd_00133	0.811893	±	0.0948425	0.564834	±	0.0411543	0.523462	820.013	587.828	0.480252
1.1.1.44	EIE76968.1	Rd_00134	1.05168	±	0.120872	0.751141	±	0.0986834	0.485543	702.739	525.295	0.419863
1.1.1.44	EIE78341.1	Rd_00135	1.05168	±	0.120872	0.751141	±	0.0986834	0.485543	5.93595	4.74836	0.322048
1.1.1.44	EIE80158.1	Rd_00136	0.0258929	±	0.00344626	0.0384537	±	0.002511	-0.570566	228.537	118.529	0.947186
1.1.1.41	EIE77365.1	Rd_00137	0.861765	±	0.0357556	0.110443	±	0.0128934	2.96399	472.243	224.675	1.07169
1.1.1.41	EIE79890.1	Rd_00138	0.0365414	±	0.00101319	0.119523	±	0.0254026	-1.70969	216.686	103.576	1.06491
1.1.1.42	contig-100_3298_+2_max_po1	Rd_00139	0.268576	±	0.00890062	0.163781	±	0.0336177	0.713563	457.56	710.148	-0.634159
1.1.1.42	EIE75631.1	Rd_00140	0.168787	±	0.00824064	0.117438	±	0.0223401	0.523308	486.138	746.887	-0.619523
1.1.1.42	EIE89109.1	Rd_00141	0.168787	±	0.00824064	0.117438	±	0.0223401	0.523308	21.2586	0.557515	5.2529
2.5.1.3	contig-100_2726_-2_max_po1	Rd_00142	0.0200892	±	0.00300557	0.00577017	±	0.000798748	1.79974	142.853	272.957	-0.934138
2.5.1.3	EIE92513.1	Rd_00143	0.0278301	±	0.00431388	0.00878095	±	0.000245521	1.6642	145.881	274.407	-0.911528
2.4.1.11	contig-100_374_-0_max_po1	Rd_00144	n.d.	±	0	n.d.	±	0	-	75.5025	208.074	-1.4625
2.4.1.11	EIE85353.1	Rd_00145	n.d.	±	0	n.d.	±	0	-	157.219	154.428	0.0258439
2.4.1.11	EIE88401.1	Rd_00146	n.d.	±	0	n.d.	±	0	-	32.1782	7.15365	2.16933
2.4.1.11	EIE90467.1	Rd_00147	n.d.	±	0	n.d.	±	0	-	7.03944	49.5012	-2.81393
2.4.1.15	contig-100_196_+1_max_po1	Rd_00148	n.d.	±	0	n.d.	±	0	-	41.3011	42.0065	-0.0244313
2.4.1.15	contig-100_1011_-1_max_po1	Rd_00149	0	±	0	0.00515997	±	0.0009274	-100	222.94	168.313	0.40551
2.4.1.15	EIE78536.1	Rd_00150	n.d.	±	0	n.d.	±	0	-	49.9565	26.7945	0.898734
2.4.1.15	EIE82678.1	Rd_00151	0.000945418	±	0.000725508	0.000228649	±	3.54711e-05	2.04782	113.669	196.008	-0.786072
2.4.1.15	EIE85198.1	Rd_00152	n.d.	±	0	n.d.	±	0	-	33.8039	38.2703	-0.179034
2.4.1.15	EIE86485.1	Rd_00153	n.d.	±	0	n.d.	±	0	-	153.733	158.116	-0.0405574
2.4.1.15	EIE88419.1	Rd_00154	n.d.	±	0	n.d.	±	0	-	7.6355	5.26722	0.535682
2.4.1.15	EIE89609.1	Rd_00155	n.d.	±	0	n.d.	±	0	-	3.14107	15.3717	-2.29094
2.4.1.15	EIE89882.1	Rd_00156	n.d.	±	0	n.d.	±	0	-	23.9565	38.5437	-0.686079
2.4.1.15	EIE90113.1	Rd_00157	0	±	0	0.00776789	±	0.000821092	-100	195.78	153.764	0.348521
2.4.1.16	contig-100_8_+1_max_po1	Rd_00158	0.0247155	±	0.00557956	0.025321	±	0.00454337	-0.0349187	85.9654	54.6764	0.652837
2.4.1.16	contig-100_25_-0_max_po1	Rd_00159	0.039161	±	0.00668039	0.0212784	±	0.00423904	0.880028	58.328	51.4037	0.182316
2.4.1.16	contig-100_118_-0_max_po1	Rd_00160	0.00358035	±	0.000665113	0.00372723	±	0.000619105	-0.058006	44.7267	29.8061	0.58553
2.4.1.16	contig-100_187_+1_max_po1	Rd_00161	0.0234643	±	0.00150478	0.0177644	±	0.000109606	0.40148	97.2874	53.0105	0.875974
2.4.1.16	contig-100_4509_+1_max_po1	Rd_00162	0.0766994	±	0.00348198	0.0229773	±	0.00961814	1.73901	333.823	129.518	1.36594
2.4.1.16	contig-100_7551_-0_max_po1	Rd_00163	0.00261645	±	0.00105879	0	±	0	100	139.959	105.035	0.414124
2.4.1.16	contig-100_7562_-0_max_po1	Rd_00164	0.00261645	±	0.00105879	0	±	0	100	144.273	77.9443	0.888287
2.4.1.16	EIE75722.1	Rd_00165	0.0121446	±	0.00717048	0.0111603	±	0.00073239	0.12194	107.81	58.1322	0.891078
2.4.1.16	EIE75818.1	Rd_00166	0.0113355	±	0.000524105	0.00368924	±	0.00103372	1.61946	137.657	98.651	0.480671
2.4.1.16	EIE76238.1	Rd_00167	n.d.	±	0	n.d.	±	0	-	28.3905	2.2555	3.65388
2.4.1.16	EIE76239.1	Rd_00168	n.d.	±	0	n.d.	±	0	-	54.9152	5.34648	3.36055
2.4.1.16	EIE79738.1	Rd_00169	0.0658941	±	0.0154448	0.041778	±	0.00652615	0.657405	59.4711	51.4866	0.20799
2.4.1.16	EIE79998.1	Rd_00170	0.0119596	±	0.00142486	0.00439631	±	0.00134782	1.44381	0.037037	0.0148256	1.32088
2.4.1.16	EIE81462.1	Rd_00171	0.0121446	±	0.00717048	0.0111603	±	0.00073239	0.12194	0.41129	0.0274394	3.90584
2.4.1.16	EIE83394.1	Rd_00172	n.d.	±	0	n.d.	±	0	-	159.127	74.6838	1.09131
2.4.1.16	EIE85441.1	Rd_00173	0.0199503	±	0.00389125	0.017523	±	0.00259375	0.187162	0.292615	0.0755687	1.95314
2.4.1.16	EIE85858.1	Rd_00174	0.00409158	±	0.000145907	0.00389218	±	0.00107497	0.0720766	28.0548	31.7851	-0.180105
2.4.1.16	EIE86454.1	Rd_00175	0.00884184	±	0.00232206	0.00160101	±	4.12534e-05	2.46536	15.5803	6.55723	1.24857
2.4.1.16	EIE87189.1	Rd_00176	n.d.	±	0	n.d.	±	0	-	33.9409	20.6865	0.714336
2.4.1.16	EIE87636.1	Rd_00177	0.0119596	±	0.00142486	0.00439631	±	0.00134782	1.44381	130.802	101.947	0.359566
2.4.1.16	EIE87765.1	Rd_00178	0.00125566	±	0.000292465	0.00178934	±	9.02983e-05	-0.510981	0.463346	0.217452	1.09139
2.4.1.16	EIE88503.1	Rd_00179	0.00125566	±	0.000292465	0.00178934	±	9.02983e-05	-0.510981	50.0802	32.9298	0.604846
2.4.1.16	EIE90774.1	Rd_00180	n.d.	±	0	n.d.	±	0	-	4.34523	6.85589	-0.657911
2.4.1.16	EIE91519.1	Rd_00181	0.0113355	±	0.000524105	0.00368924	±	0.00103372	1.61946	222.596	97.0621	1.19745
2.4.1.18	contig-100_8270_+2_max_po1	Rd_00182	n.d.	±	0	n.d.	±	0	-	11.925	8.15283	0.548622
2.4.1.18	EIE88449.1	Rd_00183	n.d.	±	0	n.d.	±	0	-	7.22941	4.55619	0.666048
2.4.1.18	EIE89160.1	Rd_00184	n.d.	±	0	n.d.	±	0	-	7.52299	5.45417	0.463947
2.3.1.61	contig-100_5279_-1_max_po1	Rd_00185	n.d.	±	0	n.d.	±	0	-	328.703	195.502	0.749601
2.3.1.61	EIE81822.1	Rd_00186	n.d.	±	0	n.d.	±	0	-	282.853	178.952	0.660479
2.3.1.61	EIE82905.1	Rd_00187	n.d.	±	0	n.d.	±	0	-	214.59	80.2876	1.41833
2.4.2.9	contig-100_7275_-2_max_po1	Rd_00188	n.d.	±	0	n.d.	±	0	-	188.572	158.179	0.253565
2.4.2.9	contig-100_7790_+0_max_po1	Rd_00189	0.143416	±	0.0322762	0	±	0	100	375.957	175.194	1.10162
2.4.2.9	EIE83761.1	Rd_00190	n.d.	±	0	n.d.	±	0	-	10.2636	10.7365	-0.0649926
2.4.2.9	EIE85274.1	Rd_00191	n.d.	±	0	n.d.	±	0	-	61.7215	45.5953	0.43689
2.4.2.9	EIE88283.1	Rd_00192	0.241547	±	0.0709229	0	±	0	100	400.092	187.822	1.09097
2.4.2.8	contig-100_7879_+1_max_po1	Rd_00193	0.0426205	±	0.0093905	0.0240973	±	0.000301461	0.822676	225.523	140.568	0.682005
3.6.1.22	contig-100_3039_+2_max_po1	Rd_00194	n.d.	±	0	n.d.	±	0	-	44.2238	33.7584	0.389575
3.6.1.23	contig-100_9872_+1_max_po1	Rd_00195	n.d.	±	0	n.d.	±	0	-	60.9331	30.7967	0.984448
3.6.1.23	EIE92058.1	Rd_00196	n.d.	±	0	n.d.	±	0	-	68.9566	34.4159	1.00261
2.4.2.1	contig-100_5303_-2_max_po1	Rd_00197	0.0252011	±	0.0122938	0.0099622	±	0.00314797	1.33895	125.531	67.2119	0.90126
2.4.2.1	EIE76295.1	Rd_00198	0.0116112	±	0.00107801	0.00409234	±	0.000125133	1.50451	135.228	111.682	0.275988
4.2.3.12	contig-100_8607_-2_max_po1	Rd_00199	n.d.	±	0	n.d.	±	0	-	101.591	80.7045	0.332048
4.2.3.12	EIE80118.1	Rd_00200	n.d.	±	0	n.d.	±	0	-	99.5131	81.8124	0.282566
2.7.11.2	contig-100_3587_+2_max_po1	Rd_00201	n.d.	±	0	n.d.	±	0	-	244.676	175.116	0.482557
2.7.11.2	EIE82940.1	Rd_00202	n.d.	±	0	n.d.	±	0	-	47.147	31.5681	0.5787
2.7.11.1	contig-100_14_-1_max_po1	Rd_00203	n.d.	±	0	n.d.	±	0	-	32.9675	30.2366	0.124751
2.7.11.1	contig-100_2316_-2_max_po1	Rd_00204	0.100674	±	0.0138709	0.0236917	±	0.00498691	2.08724	315.128	233.037	0.435376
2.7.11.1	contig-100_3745_-2_max_po1	Rd_00205	0.0073287	±	0.000881294	0	±	0	100	352.292	427.938	-0.280631
2.7.11.1	contig-100_4935_+0_max_po1	Rd_00206	0	±	0	0.0345967	±	0.00252357	-100	549.232	517.144	0.08685
2.7.11.1	EIE75350.1	Rd_00207	n.d.	±	0	n.d.	±	0	-	79.1147	56.7683	0.47886
2.7.11.1	EIE75364.1	Rd_00208	n.d.	±	0	n.d.	±	0	-	18.157	10.8925	0.737186
2.7.11.1	EIE75641.1	Rd_00209	n.d.	±	0	n.d.	±	0	-	37.7256	26.27	0.522129
2.7.11.1	EIE75647.1	Rd_00210	n.d.	±	0	n.d.	±	0	-	200.32	106.494	0.911529
2.7.11.1	EIE75951.1	Rd_00211	n.d.	±	0	n.d.	±	0	-	43.4658	25.8826	0.747897
2.7.11.1	EIE76248.1	Rd_00212	n.d.	±	0	n.d.	±	0	-	113.969	120.017	-0.0745963
2.7.11.1	EIE76472.1	Rd_00213	n.d.	±	0	n.d.	±	0	-	9.19201	9.1663	0.00404068
2.7.11.1	EIE76752.1	Rd_00214	n.d.	±	0	n.d.	±	0	-	80.5609	59.9833	0.425519
2.7.11.1	EIE76958.1	Rd_00215	n.d.	±	0	n.d.	±	0	-	19.9854	16.5236	0.274416
2.7.11.1	EIE77096.1	Rd_00216	n.d.	±	0	n.d.	±	0	-	171.074	92.5759	0.885911
2.7.11.1	EIE77199.1	Rd_00217	n.d.	±	0	n.d.	±	0	-	225.694	117.175	0.945706
2.7.11.1	EIE77208.1	Rd_00218	n.d.	±	0	n.d.	±	0	-	128.419	57.1482	1.16808
2.7.11.1	EIE77271.1	Rd_00219	n.d.	±	0	n.d.	±	0	-	49.3665	31.7043	0.638852
2.7.11.1	EIE77346.1	Rd_00220	n.d.	±	0	n.d.	±	0	-	44.6937	33.7424	0.405512
2.7.11.1	EIE77492.1	Rd_00221	n.d.	±	0	n.d.	±	0	-	55.9069	44.8013	0.319484
2.7.11.1	EIE77546.1	Rd_00222	n.d.	±	0	n.d.	±	0	-	36.4698	65.3493	-0.84147
2.7.11.1	EIE77628.1	Rd_00223	n.d.	±	0	n.d.	±	0	-	20.0095	12.1759	0.716656
2.7.11.1	EIE77696.1	Rd_00224	n.d.	±	0	n.d.	±	0	-	59.3395	31.6107	0.908582
2.7.11.1	EIE77782.1	Rd_00225	n.d.	±	0	n.d.	±	0	-	97.7602	86.8346	0.170977
2.7.11.1	EIE77846.1	Rd_00226	n.d.	±	0	n.d.	±	0	-	306.923	205.053	0.58188
2.7.11.1	EIE77928.1	Rd_00227	n.d.	±	0	n.d.	±	0	-	55.1483	45.9307	0.263857
2.7.11.1	EIE78049.1	Rd_00228	n.d.	±	0	n.d.	±	0	-	161.323	80.9527	0.994802
2.7.11.1	EIE78303.1	Rd_00229	n.d.	±	0	n.d.	±	0	-	56.2926	48.317	0.220415
2.7.11.1	EIE78497.1	Rd_00230	n.d.	±	0	n.d.	±	0	-	5.37045	2.51681	1.09344
2.7.11.1	EIE78728.1	Rd_00231	n.d.	±	0	n.d.	±	0	-	72.3797	38.2693	0.919397
2.7.11.1	EIE78778.1	Rd_00232	n.d.	±	0	n.d.	±	0	-	530.388	201.997	1.39272
2.7.11.1	EIE78789.1	Rd_00233	n.d.	±	0	n.d.	±	0	-	69.6162	81.037	-0.219156
2.7.11.1	EIE78957.1	Rd_00234	n.d.	±	0	n.d.	±	0	-	117.505	82.3267	0.513286
2.7.11.1	EIE79161.1	Rd_00235	n.d.	±	0	n.d.	±	0	-	41.1809	85.6978	-1.05728
2.7.11.1	EIE79432.1	Rd_00236	n.d.	±	0	n.d.	±	0	-	158.534	121.073	0.388918
2.7.11.1	EIE79443.1	Rd_00237	n.d.	±	0	n.d.	±	0	-	29.5278	28.088	0.0721193
2.7.11.1	EIE79479.1	Rd_00238	n.d.	±	0	n.d.	±	0	-	41.8052	23.3159	0.842372
2.7.11.1	EIE79553.1	Rd_00239	n.d.	±	0	n.d.	±	0	-	74.1843	54.0661	0.45639
2.7.11.1	EIE79582.1	Rd_00240	n.d.	±	0	n.d.	±	0	-	133.87	109.915	0.284441
2.7.11.1	EIE79599.1	Rd_00241	n.d.	±	0	n.d.	±	0	-	79.2975	20.8023	1.93053
2.7.11.1	EIE79603.1	Rd_00242	n.d.	±	0	n.d.	±	0	-	26.162	16.0566	0.704308
2.7.11.1	EIE79691.1	Rd_00243	n.d.	±	0	n.d.	±	0	-	29.0904	20.0063	0.540089
2.7.11.1	EIE79870.1	Rd_00244	n.d.	±	0	n.d.	±	0	-	80.7414	57.4449	0.491129
2.7.11.1	EIE80067.1	Rd_00245	n.d.	±	0	n.d.	±	0	-	94.6633	59.8137	0.662328
2.7.11.1	EIE80122.1	Rd_00246	n.d.	±	0	n.d.	±	0	-	49.6993	37.5243	0.4054
2.7.11.1	EIE80133.1	Rd_00247	n.d.	±	0	n.d.	±	0	-	83.5212	71.6345	0.221488
2.7.11.1	EIE80173.1	Rd_00248	n.d.	±	0	n.d.	±	0	-	14.1044	6.74088	1.06513
2.7.11.1	EIE80369.1	Rd_00249	n.d.	±	0	n.d.	±	0	-	144.119	87.1817	0.725161
2.7.11.1	EIE80827.1	Rd_00250	n.d.	±	0	n.d.	±	0	-	54.0958	39.2409	0.46316
2.7.11.1	EIE80888.1	Rd_00251	n.d.	±	0	n.d.	±	0	-	10.5685	11.3348	-0.100982
2.7.11.1	EIE80988.1	Rd_00252	0.00157861	±	0.000345879	0	±	0	100	123.106	74.6412	0.721862
2.7.11.1	EIE80994.1	Rd_00253	n.d.	±	0	n.d.	±	0	-	13.2838	9.24774	0.522496
2.7.11.1	EIE81001.1	Rd_00254	n.d.	±	0	n.d.	±	0	-	37.4315	30.8519	0.278892
2.7.11.1	EIE81073.1	Rd_00255	n.d.	±	0	n.d.	±	0	-	118.989	68.8874	0.788516
2.7.11.1	EIE81091.1	Rd_00256	n.d.	±	0	n.d.	±	0	-	145.524	121.37	0.261847
2.7.11.1	EIE81276.1	Rd_00257	n.d.	±	0	n.d.	±	0	-	8.0645	6.15741	0.38926
2.7.11.1	EIE81280.1	Rd_00258	n.d.	±	0	n.d.	±	0	-	17.8064	7.25218	1.29591
2.7.11.1	EIE81290.1	Rd_00259	n.d.	±	0	n.d.	±	0	-	89.2621	109.988	-0.301226
2.7.11.1	EIE81300.1	Rd_00260	n.d.	±	0	n.d.	±	0	-	8.60669	3.58755	1.26246
2.7.11.1	EIE81373.1	Rd_00261	0.000598708	±	0.000103173	0.00253462	±	0.000766595	-2.08185	120.031	93.4655	0.360899
2.7.11.1	EIE81423.1	Rd_00262	n.d.	±	0	n.d.	±	0	-	93.006	71.113	0.387212
2.7.11.1	EIE81431.1	Rd_00263	n.d.	±	0	n.d.	±	0	-	55.1704	53.4555	0.0455547
2.7.11.1	EIE81509.1	Rd_00264	n.d.	±	0	n.d.	±	0	-	47.2984	20.56	1.20195
2.7.11.1	EIE81852.1	Rd_00265	n.d.	±	0	n.d.	±	0	-	21.5061	10.3232	1.05886
2.7.11.1	EIE81887.1	Rd_00266	n.d.	±	0	n.d.	±	0	-	101.376	62.3145	0.702071
2.7.11.1	EIE81937.1	Rd_00267	n.d.	±	0	n.d.	±	0	-	73.5084	52.0388	0.49832
2.7.11.1	EIE82050.1	Rd_00268	n.d.	±	0	n.d.	±	0	-	61.6708	29.417	1.06794
2.7.11.1	EIE82128.1	Rd_00269	n.d.	±	0	n.d.	±	0	-	17.796	19.3436	-0.120301
2.7.11.1	EIE82455.1	Rd_00270	n.d.	±	0	n.d.	±	0	-	105.76	98.8022	0.0981763
2.7.11.1	EIE82551.1	Rd_00271	n.d.	±	0	n.d.	±	0	-	73.1756	55.0105	0.411655
2.7.11.1	EIE82699.1	Rd_00272	n.d.	±	0	n.d.	±	0	-	49.0419	37.8642	0.373178
2.7.11.1	EIE82845.1	Rd_00273	n.d.	±	0	n.d.	±	0	-	56.2358	50.0019	0.169506
2.7.11.1	EIE82947.1	Rd_00274	n.d.	±	0	n.d.	±	0	-	42.4156	26.0983	0.700639
2.7.11.1	EIE83117.1	Rd_00275	n.d.	±	0	n.d.	±	0	-	43.6052	25.4637	0.776058
2.7.11.1	EIE83304.1	Rd_00276	n.d.	±	0	n.d.	±	0	-	68.6052	19.1564	1.84049
2.7.11.1	EIE83440.1	Rd_00277	n.d.	±	0	n.d.	±	0	-	15.0627	19.0976	-0.342417
2.7.11.1	EIE83559.1	Rd_00278	n.d.	±	0	n.d.	±	0	-	29.7447	16.4507	0.854485
2.7.11.1	EIE83561.1	Rd_00279	n.d.	±	0	n.d.	±	0	-	42.8485	22.5299	0.927405
2.7.11.1	EIE83573.1	Rd_00280	n.d.	±	0	n.d.	±	0	-	72.3557	61.8212	0.227003
2.7.11.1	EIE83605.1	Rd_00281	n.d.	±	0	n.d.	±	0	-	1207.45	820.489	0.557408
2.7.11.1	EIE83683.1	Rd_00282	n.d.	±	0	n.d.	±	0	-	25.9858	54.2783	-1.06265
2.7.11.1	EIE83697.1	Rd_00283	n.d.	±	0	n.d.	±	0	-	38.1696	47.279	-0.308773
2.7.11.1	EIE83895.1	Rd_00284	n.d.	±	0	n.d.	±	0	-	27.5375	5.75228	2.25919
2.7.11.1	EIE83899.1	Rd_00285	n.d.	±	0	n.d.	±	0	-	1202.08	1868.89	-0.636653
2.7.11.1	EIE84822.1	Rd_00286	0.00438087	±	0.000555704	0.00260417	±	0.000527904	0.750391	206.798	118.422	0.80428
2.7.11.1	EIE85017.1	Rd_00287	n.d.	±	0	n.d.	±	0	-	9.08007	0.899981	3.33474
2.7.11.1	EIE85203.1	Rd_00288	n.d.	±	0	n.d.	±	0	-	52.6849	33.5799	0.649792
2.7.11.1	EIE85855.1	Rd_00289	n.d.	±	0	n.d.	±	0	-	18.8392	17.2876	0.124001
2.7.11.1	EIE85865.1	Rd_00290	0	±	0	0.0143266	±	0.0036264	-100	551.235	512.737	0.104449
2.7.11.1	EIE85868.1	Rd_00291	n.d.	±	0	n.d.	±	0	-	136.534	76.5929	0.833981
2.7.11.1	EIE85921.1	Rd_00292	n.d.	±	0	n.d.	±	0	-	81.7479	51.0154	0.680248
2.7.11.1	EIE85928.1	Rd_00293	n.d.	±	0	n.d.	±	0	-	57.2193	42.0178	0.445503
2.7.11.1	EIE86125.1	Rd_00294	n.d.	±	0	n.d.	±	0	-	10.7583	5.66858	0.924396
2.7.11.1	EIE86302.1	Rd_00295	n.d.	±	0	n.d.	±	0	-	15.3589	13.9778	0.135934
2.7.11.1	EIE86308.1	Rd_00296	n.d.	±	0	n.d.	±	0	-	19.6547	21.5097	-0.130114
2.7.11.1	EIE86388.1	Rd_00297	0.0022901	±	0.000749176	0	±	0	100	62.331	54.8766	0.183758
2.7.11.1	EIE86676.1	Rd_00298	n.d.	±	0	n.d.	±	0	-	16.9647	16.4446	0.0449196
2.7.11.1	EIE86908.1	Rd_00299	0.152455	±	0.0140642	0.0533268	±	0.00562453	1.51545	327.692	241.297	0.441532
2.7.11.1	EIE86934.1	Rd_00300	n.d.	±	0	n.d.	±	0	-	165.126	155.6	0.0857253
2.7.11.1	EIE86969.1	Rd_00301	n.d.	±	0	n.d.	±	0	-	105.804	65.0718	0.701286
2.7.11.1	EIE87008.1	Rd_00302	n.d.	±	0	n.d.	±	0	-	8.0042	5.57004	0.523068
2.7.11.1	EIE87140.1	Rd_00303	n.d.	±	0	n.d.	±	0	-	44.5866	11.3935	1.9684
2.7.11.1	EIE87168.1	Rd_00304	n.d.	±	0	n.d.	±	0	-	27.8404	25.9403	0.101984
2.7.11.1	EIE87218.1	Rd_00305	n.d.	±	0	n.d.	±	0	-	79.2075	63.5987	0.31664
2.7.11.1	EIE87403.1	Rd_00306	n.d.	±	0	n.d.	±	0	-	103.212	50.9363	1.01885
2.7.11.1	EIE87545.1	Rd_00307	n.d.	±	0	n.d.	±	0	-	255.147	135.717	0.910731
2.7.11.1	EIE87677.1	Rd_00308	n.d.	±	0	n.d.	±	0	-	149.343	22.7382	2.71544
2.7.11.1	EIE87728.1	Rd_00309	n.d.	±	0	n.d.	±	0	-	74.7764	51.1081	0.549031
2.7.11.1	EIE87771.1	Rd_00310	n.d.	±	0	n.d.	±	0	-	67.0581	73.2937	-0.128277
2.7.11.1	EIE87775.1	Rd_00311	n.d.	±	0	n.d.	±	0	-	89.2773	58.0434	0.621162
2.7.11.1	EIE87881.1	Rd_00312	n.d.	±	0	n.d.	±	0	-	109.319	70.1521	0.639981
2.7.11.1	EIE88086.1	Rd_00313	0.00438087	±	0.000555704	0.00260417	±	0.000527904	0.750391	11.3787	2.93832	1.95327
2.7.11.1	EIE88137.1	Rd_00314	n.d.	±	0	n.d.	±	0	-	2.25825	4.87727	-1.11087
2.7.11.1	EIE88421.1	Rd_00315	n.d.	±	0	n.d.	±	0	-	52.6207	47.9036	0.135497
2.7.11.1	EIE88491.1	Rd_00316	n.d.	±	0	n.d.	±	0	-	26.788	14.0378	0.932272
2.7.11.1	EIE88500.1	Rd_00317	n.d.	±	0	n.d.	±	0	-	71.5988	31.6172	1.17922
2.7.11.1	EIE88800.1	Rd_00318	n.d.	±	0	n.d.	±	0	-	566.036	184.446	1.61769
2.7.11.1	EIE88848.1	Rd_00319	n.d.	±	0	n.d.	±	0	-	66.5616	26.7996	1.31248
2.7.11.1	EIE88873.1	Rd_00320	n.d.	±	0	n.d.	±	0	-	31.2368	24.5449	0.347825
2.7.11.1	EIE88902.1	Rd_00321	n.d.	±	0	n.d.	±	0	-	2.94036	1.73009	0.765146
2.7.11.1	EIE89253.1	Rd_00322	n.d.	±	0	n.d.	±	0	-	54.5982	32.9423	0.728912
2.7.11.1	EIE89472.1	Rd_00323	n.d.	±	0	n.d.	±	0	-	494.398	298.613	0.727396
2.7.11.1	EIE89599.1	Rd_00324	n.d.	±	0	n.d.	±	0	-	64.9769	44.0554	0.560608
2.7.11.1	EIE89671.1	Rd_00325	n.d.	±	0	n.d.	±	0	-	90.765	63.2256	0.521627
2.7.11.1	EIE89796.1	Rd_00326	n.d.	±	0	n.d.	±	0	-	54.0141	38.2185	0.499063
2.7.11.1	EIE89805.1	Rd_00327	n.d.	±	0	n.d.	±	0	-	34.3063	35.2226	-0.0380284
2.7.11.1	EIE89874.1	Rd_00328	n.d.	±	0	n.d.	±	0	-	275.479	179.595	0.617196
2.7.11.1	EIE89893.1	Rd_00329	n.d.	±	0	n.d.	±	0	-	19.2828	18.2371	0.080438
2.7.11.1	EIE90048.1	Rd_00330	n.d.	±	0	n.d.	±	0	-	25.9845	20.0694	0.372656
2.7.11.1	EIE90123.1	Rd_00331	n.d.	±	0	n.d.	±	0	-	40.4438	13.7566	1.55579
2.7.11.1	EIE90227.1	Rd_00332	n.d.	±	0	n.d.	±	0	-	106.296	71.8995	0.564039
2.7.11.1	EIE90320.1	Rd_00333	0.000598708	±	0.000103173	0.00253462	±	0.000766595	-2.08185	52.442	44.9168	0.223469
2.7.11.1	EIE90361.1	Rd_00334	n.d.	±	0	n.d.	±	0	-	47.0976	36.0725	0.384754
2.7.11.1	EIE90614.1	Rd_00335	n.d.	±	0	n.d.	±	0	-	11.4397	3.78412	1.59602
2.7.11.1	EIE90755.1	Rd_00336	0.00630489	±	0.0016898	0	±	0	100	362.537	433.435	-0.257687
2.7.11.1	EIE90777.1	Rd_00337	n.d.	±	0	n.d.	±	0	-	102.938	87.4703	0.234914
2.7.11.1	EIE90850.1	Rd_00338	n.d.	±	0	n.d.	±	0	-	9.56038	0.974246	3.29471
2.7.11.1	EIE90940.1	Rd_00339	n.d.	±	0	n.d.	±	0	-	118.648	99.2116	0.258111
2.7.11.1	EIE91233.1	Rd_00340	n.d.	±	0	n.d.	±	0	-	122.428	76.3514	0.681208
2.7.11.1	EIE91377.1	Rd_00341	n.d.	±	0	n.d.	±	0	-	68.318	56.7782	0.26693
2.7.11.1	EIE91553.1	Rd_00342	n.d.	±	0	n.d.	±	0	-	105.444	109.094	-0.0490947
2.7.11.1	EIE91583.1	Rd_00343	n.d.	±	0	n.d.	±	0	-	38.7309	26.4631	0.549502
2.7.11.1	EIE91682.1	Rd_00344	n.d.	±	0	n.d.	±	0	-	13.0182	2.80301	2.21548
2.7.11.1	EIE91742.1	Rd_00345	n.d.	±	0	n.d.	±	0	-	51.6543	45.1862	0.193004
2.7.11.1	EIE91760.1	Rd_00346	n.d.	±	0	n.d.	±	0	-	100.779	71.6143	0.492873
2.7.11.1	EIE91763.1	Rd_00347	n.d.	±	0	n.d.	±	0	-	36.5043	29.0639	0.328841
2.7.11.1	EIE91939.1	Rd_00348	n.d.	±	0	n.d.	±	0	-	52.479	37.6321	0.479774
2.7.11.1	EIE92236.1	Rd_00349	n.d.	±	0	n.d.	±	0	-	92.256	57.0044	0.694571
2.7.11.1	EIE92270.1	Rd_00350	n.d.	±	0	n.d.	±	0	-	124.094	75.1437	0.723706
2.7.11.1	EIE92423.1	Rd_00351	n.d.	±	0	n.d.	±	0	-	45.7926	29.5013	0.634336
2.7.11.1	EIE92485.1	Rd_00352	n.d.	±	0	n.d.	±	0	-	89.1369	67.4756	0.401656
1.6.99.5	contig-100_6876_+1_max_po1	Rd_00353	n.d.	±	0	n.d.	±	0	-	-	-	-
1.6.99.5	EIE80384.1	Rd_00354	n.d.	±	0	n.d.	±	0	-	227.273	125.183	0.860385
1.6.99.5	EIE81792.1	Rd_00355	n.d.	±	0	n.d.	±	0	-	508.154	276.938	0.875703
1.6.99.5	EIE81850.1	Rd_00356	0.0106369	±	0.00124576	0	±	0	100	233.263	145.751	0.678447
1.6.99.5	EIE82913.1	Rd_00357	0.0106369	±	0.00124576	0	±	0	100	131.332	102.519	0.357329
1.6.99.5	EIE86286.1	Rd_00358	n.d.	±	0	n.d.	±	0	-	288.081	232.692	0.308055
1.6.99.5	EIE88472.1	Rd_00359	n.d.	±	0	n.d.	±	0	-	482.992	283.447	0.768922
1.6.99.3	contig-100_2603_-1_max_po1	Rd_00360	n.d.	±	0	n.d.	±	0	-	-	-	-
1.6.99.3	EIE75829.1	Rd_00361	n.d.	±	0	n.d.	±	0	-	130.533	74.8612	0.802124
1.6.99.3	EIE79198.1	Rd_00362	n.d.	±	0	n.d.	±	0	-	323.829	196.293	0.722222
1.6.99.3	EIE81792.1	Rd_00363	n.d.	±	0	n.d.	±	0	-	508.154	276.938	0.875703
1.6.99.3	EIE81850.1	Rd_00364	0.0106369	±	0.00124576	0	±	0	100	233.263	145.751	0.678447
1.6.99.3	EIE82913.1	Rd_00365	0.0106369	±	0.00124576	0	±	0	100	131.332	102.519	0.357329
1.6.99.3	EIE84997.1	Rd_00366	n.d.	±	0	n.d.	±	0	-	144.752	104.393	0.471561
1.6.99.3	EIE87628.1	Rd_00367	n.d.	±	0	n.d.	±	0	-	150.312	97.4186	0.625691
1.6.99.3	EIE88472.1	Rd_00368	n.d.	±	0	n.d.	±	0	-	482.992	283.447	0.768922
1.6.99.3	EIE88673.1	Rd_00369	n.d.	±	0	n.d.	±	0	-	113.017	92.0833	0.295529
1.6.99.3	EIE91504.1	Rd_00370	n.d.	±	0	n.d.	±	0	-	249.757	133.359	0.905204
1.3.1.89	contig-100_4237_+2_max_po1	Rd_00371	n.d.	±	0	n.d.	±	0	-	-	-	-
1.3.1.89	EIE75405.1	Rd_00372	n.d.	±	0	n.d.	±	0	-	37.0051	16.5276	1.16284
3.5.1.98	contig-100_1203_-2_max_po1	Rd_00373	n.d.	±	0	n.d.	±	0	-	-	-	-
3.5.1.98	EIE78722.1	Rd_00374	n.d.	±	0	n.d.	±	0	-	85.9902	62.4579	0.461289
3.5.1.98	EIE85135.1	Rd_00375	n.d.	±	0	n.d.	±	0	-	94.6667	72.5449	0.383983
3.5.1.98	EIE86938.1	Rd_00376	n.d.	±	0	n.d.	±	0	-	19.6681	11.7174	0.747204
3.4.24.84	contig-100_3449_+0_max_po1	Rd_00377	0.0480958	±	0.0125726	0.0882145	±	0.0253724	-0.875106	116.476	98.1098	0.247564
3.4.24.84	EIE81350.1	Rd_00378	0.0574169	±	0.0056534	0.123309	±	0.03129	-1.10273	120.245	99.7374	0.269765
5.3.4.1	contig-100_843_-0_max_po2	Rd_00379	0.00826395	±	0.000549619	0.043358	±	0.0112901	-2.3914	291.365	228.513	0.350552
5.3.4.1	contig-100_1018_+2_max_po1	Rd_00380	0.0435167	±	0.000412353	0.0332722	±	0.00208867	0.387253	804.801	408.612	0.9779
5.3.4.1	EIE76133.1	Rd_00381	0.0582937	±	0.00299566	0.0425488	±	0.00331554	0.45422	369.605	207.778	0.83094
5.3.4.1	EIE77305.1	Rd_00382	n.d.	±	0	n.d.	±	0	-	27.5456	7.8274	1.81522
5.3.4.1	EIE84149.1	Rd_00383	n.d.	±	0	n.d.	±	0	-	27.4283	18.2884	0.584732
5.3.4.1	EIE85985.1	Rd_00384	n.d.	±	0	n.d.	±	0	-	148.026	91.5135	0.693799
5.3.4.1	EIE88364.1	Rd_00385	0.012637	±	5.04975e-05	0.0647107	±	0.0149943	-2.35635	180.793	148.307	0.285755
1.1.1.102	contig-100_3748_-2_max_po1	Rd_00386	0	±	0	0.0152578	±	0.0042932	-100	123.252	89.8602	0.455851
1.1.1.102	EIE80327.1	Rd_00387	0	±	0	0.0173005	±	0.00565069	-100	140.174	100.765	0.476221
1.1.1.100	contig-100_2_-1_max_po1	Rd_00388	0.0532545	±	0.00537616	0.10982	±	0.00839825	-1.04416	110.402	196.888	-0.834611
1.1.1.100	EIE91460.1	Rd_00389	0.084381	±	0.0112705	0.132325	±	0.0124511	-0.649092	43.2619	68.9614	-0.672692
4.1.3.27	contig-100_995_+0_max_po1	Rd_00390	0.00456746	±	0.00166464	0.00354475	±	0.0021155	0.365708	92.3928	141.564	-0.615597
4.1.3.27	EIE75473.1	Rd_00391	n.d.	±	0	n.d.	±	0	-	118.27	120.809	-0.0306427
4.1.3.27	EIE84071.1	Rd_00392	0.00591636	±	0.00258998	0.00415051	±	0.0023796	0.511421	92.9104	141.828	-0.610235
1.2.1.12	contig-100_4587_+0_max_po1	Rd_00393	2.45621	±	0.361868	1.57667	±	0.473153	0.639556	4405.88	10694.7	-1.27939
1.2.1.12	contig-100_5181_-0_max_po1	Rd_00394	0.327724	±	0.00936195	0.0471269	±	0.0115488	2.79786	70.9832	3548.49	-5.64358
1.2.1.12	EIE81131.1	Rd_00395	1.61145	±	0.162685	0.481499	±	0.0319361	1.74275	9535.15	8508.75	0.164308
1.2.1.12	EIE83328.1	Rd_00396	1.2481	±	0.126939	1.32394	±	0.409413	-0.0850987	4611.65	11139.3	-1.27231
1.2.1.12	EIE88477.1	Rd_00397	0.0831894	±	0.00906724	0.0191754	±	0.00158456	2.11714	73.7645	3620.06	-5.61694
1.2.1.12	EIE90486.1	Rd_00398	1.2481	±	0.126939	0.302004	±	0.00824844	2.0471	0.699405	0.486069	0.524968
1.2.1.11	contig-100_3184_-0_max_po1	Rd_00399	0.146505	±	0.0141977	0.375805	±	0.0432513	-1.35904	322.274	1209.97	-1.90861
1.2.1.11	EIE77185.1	Rd_00400	0.208167	±	0.0302299	0.451309	±	0.0756583	-1.11637	225.78	1386.41	-2.61837
1.2.1.18	contig-100_2099_+2_max_po1	Rd_00401	0.0181867	±	0.00487224	0	±	0	100	138.521	124.71	0.151524
1.2.1.18	EIE87010.1	Rd_00402	0.0245783	±	0.00573534	0	±	0	100	149.447	132.843	0.169913
2.5.1.91	contig-100_1030_+0_max_po2	Rd_00403	n.d.	±	0	n.d.	±	0	-	-	-	-
2.5.1.91	EIE78042.1	Rd_00404	n.d.	±	0	n.d.	±	0	-	41.4753	48.5857	-0.22828
2.1.1.64	contig-100_1717_+0_max_po1	Rd_00405	n.d.	±	0	n.d.	±	0	-	-	-	-
2.1.1.63	contig-100_974_+2_max_po1	Rd_00406	n.d.	±	0	n.d.	±	0	-	-	-	-
2.3.3.14	EIE84230.1	Rd_00407	n.d.	±	0	n.d.	±	0	-	37.5142	159.903	-2.09169
2.3.3.14	EIE89767.1	Rd_00408	n.d.	±	0	n.d.	±	0	-	25.4205	148.937	-2.55064
1.6.5.3	contig-100_2603_-1_max_po1	Rd_00409	n.d.	±	0	n.d.	±	0	-	-	-	-
1.6.5.3	EIE75829.1	Rd_00410	n.d.	±	0	n.d.	±	0	-	130.533	74.8612	0.802124
1.6.5.3	EIE79198.1	Rd_00411	n.d.	±	0	n.d.	±	0	-	323.829	196.293	0.722222
1.6.5.3	EIE81792.1	Rd_00412	n.d.	±	0	n.d.	±	0	-	508.154	276.938	0.875703
1.6.5.3	EIE81850.1	Rd_00413	0.0106369	±	0.00124576	0	±	0	100	233.263	145.751	0.678447
1.6.5.3	EIE82913.1	Rd_00414	0.0106369	±	0.00124576	0	±	0	100	131.332	102.519	0.357329
1.6.5.3	EIE84997.1	Rd_00415	n.d.	±	0	n.d.	±	0	-	144.752	104.393	0.471561
1.6.5.3	EIE87628.1	Rd_00416	n.d.	±	0	n.d.	±	0	-	150.312	97.4186	0.625691
1.6.5.3	EIE88472.1	Rd_00417	n.d.	±	0	n.d.	±	0	-	482.992	283.447	0.768922
1.6.5.3	EIE88673.1	Rd_00418	n.d.	±	0	n.d.	±	0	-	113.017	92.0833	0.295529
1.6.5.3	EIE91504.1	Rd_00419	n.d.	±	0	n.d.	±	0	-	249.757	133.359	0.905204
4.1.1.65	contig-100_121_+0_max_po1	Rd_00420	n.d.	±	0	n.d.	±	0	-	-	-	-
4.1.1.65	EIE81962.1	Rd_00421	n.d.	±	0	n.d.	±	0	-	67.0076	35.9597	0.897942
4.1.1.65	EIE86605.1	Rd_00422	n.d.	±	0	n.d.	±	0	-	62.2557	35.6561	0.804057
4.1.1.65	EIE89514.1	Rd_00423	n.d.	±	0	n.d.	±	0	-	52.9114	46.1649	0.196781
2.7.2.4	contig-100_2359_+1_max_po1	Rd_00424	n.d.	±	0	n.d.	±	0	-	-	-	-
2.7.2.4	EIE77356.1	Rd_00425	n.d.	±	0	n.d.	±	0	-	68.8811	100.906	-0.550829
2.7.2.4	EIE79860.1	Rd_00426	n.d.	±	0	n.d.	±	0	-	86.3547	410.903	-2.25045
2.7.2.4	EIE88810.1	Rd_00427	n.d.	±	0	n.d.	±	0	-	22.0255	23.775	-0.110267
2.5.1.75	contig-100_3558_+0_max_po1	Rd_00428	n.d.	±	0	n.d.	±	0	-	-	-	-
2.3.2.15	contig-100_1549_-1_max_po1	Rd_00429	n.d.	±	0	n.d.	±	0	-	-	-	-
2.4.1.257	contig-100_1983_-0_max_po1	Rd_00430	n.d.	±	0	n.d.	±	0	-	-	-	-
2.4.1.256	contig-100_3709_-2_max_po1	Rd_00431	n.d.	±	0	n.d.	±	0	-	-	-	-
2.4.1.258	contig-100_3938_-2_max_po1	Rd_00432	n.d.	±	0	n.d.	±	0	-	-	-	-
1.14.13.132	contig-100_3088_-2_max_po1	Rd_00433	n.d.	±	0	n.d.	±	0	-	-	-	-
3.3.2.6	contig-100_243_+1_max_po1	Rd_00434	0.13617	±	0.00618732	0.0631788	±	0.0113006	1.1079	123.442	116.122	0.0881868
3.3.2.6	contig-100_1583_+0_max_po1	Rd_00435	0.0204689	±	0.00164213	0.000847171	±	0.000303725	4.59463	88.4331	44.7851	0.981568
3.3.2.6	EIE75391.1	Rd_00436	0.0128306	±	0.00054051	0	±	0	100	104.676	73.9684	0.500955
3.3.2.6	EIE81069.1	Rd_00437	0.151957	±	0.0131223	0.0615689	±	0.00757078	1.30339	193.073	144.236	0.420719
3.3.2.6	EIE83592.1	Rd_00438	0.0150678	±	0.00133575	0.00113388	±	0.000399432	3.73213	37.2494	16.3447	1.18839
3.6.1.31	contig-100_811_-1_max_po1	Rd_00439	0.0248467	±	0.00155587	0.031697	±	0.0041586	-0.351293	50.3359	108.783	-1.11179
3.6.1.31	EIE79437.1	Rd_00440	0.0400316	±	0.00500706	0.0406751	±	0.00417117	-0.0230073	51.1167	108.851	-1.09049
5.3.1.16	contig-100_7536_-0_max_po1	Rd_00441	n.d.	±	0	n.d.	±	0	-	-	-	-
4.2.1.36	contig-100_1187_+0_max_po1	Rd_00442	n.d.	±	0	n.d.	±	0	-	-	-	-
4.2.1.36	EIE80950.1	Rd_00443	n.d.	±	0	n.d.	±	0	-	15.7055	78.8539	-2.32791
4.2.1.33	contig-100_1019_-0_max_po1	Rd_00444	n.d.	±	0	n.d.	±	0	-	-	-	-
4.2.1.33	EIE80959.1	Rd_00445	n.d.	±	0	n.d.	±	0	-	107.493	163.247	-0.60282
4.2.1.33	EIE92248.1	Rd_00446	n.d.	±	0	n.d.	±	0	-	5.07057	10.0913	-0.992896
3.1.3.4	contig-100_3879_+1_max_po1	Rd_00447	n.d.	±	0	n.d.	±	0	-	-	-	-
3.1.3.4	EIE92220.1	Rd_00448	0.0259393	±	0.00156392	0	±	0	100	375.684	440.696	-0.230264
3.1.3.7	contig-100_1041_+2_max_po1	Rd_00449	0.0263028	±	0.00429719	0.0290737	±	0.00257801	-0.1445	93.4542	126.62	-0.438177
3.1.3.7	EIE86865.1	Rd_00450	0.0489232	±	0.00777796	0.0359997	±	0.00317021	0.442533	164.639	205.354	-0.318809
3.1.3.2	contig-100_9207_-2_max_po1	Rd_00451	n.d.	±	0	n.d.	±	0	-	-	-	-
3.1.3.2	EIE92455.1	Rd_00452	n.d.	±	0	n.d.	±	0	-	116.289	110.456	0.0742427
3.1.3.3	contig-100_1418_+2_max_po1	Rd_00453	n.d.	±	0	n.d.	±	0	-	-	-	-
3.1.3.3	EIE78578.1	Rd_00454	n.d.	±	0	n.d.	±	0	-	77.1231	82.8021	-0.102505
2.7.1.137	contig-100_148_-2_max_po1	Rd_00455	n.d.	±	0	n.d.	±	0	-	-	-	-
2.7.1.137	EIE82383.1	Rd_00456	n.d.	±	0	n.d.	±	0	-	39.6973	26.9958	0.556305
3.1.3.36	contig-100_329_-0_max_po1	Rd_00457	n.d.	±	0	n.d.	±	0	-	-	-	-
2.5.1.19	contig-100_49_-1_max_po1	Rd_00458	0.00220106	±	0.000491599	0.00584768	±	0.0031268	-1.40967	38.8157	67.893	-0.806622
2.5.1.19	EIE85491.1	Rd_00459	0.00312603	±	0.000962128	0.00772556	±	0.00339004	-1.30531	39.4182	67.0823	-0.767072
2.1.2.1	contig-100_2491_+0_max_po1	Rd_00460	0	±	0	0.00883808	±	0.0032585	-100	84.6205	243.556	-1.52518
2.1.2.1	contig-100_2748_+1_max_po1	Rd_00461	0.0895999	±	0.00249594	0.103735	±	0.00922913	-0.211335	311.296	241.104	0.368635
2.1.2.1	EIE82694.1	Rd_00462	0.00569453	±	0.000642943	0.0109416	±	0.00402824	-0.942178	89.6055	253.816	-1.50212
2.1.2.1	EIE85945.1	Rd_00463	0.119627	±	0.00382302	0.127671	±	0.0295799	-0.0938826	314.034	240.099	0.387291
2.1.2.2	contig-100_8126_+2_max_po1	Rd_00464	0.0412472	±	0.0117094	0	±	0	100	384.95	423.539	-0.137821
2.1.2.2	EIE77073.1	Rd_00465	0.0617855	±	0.0144082	0.0126311	±	0.00299186	2.29028	407.059	438.738	-0.108123
2.1.2.3	contig-100_1586_-0_max_po2	Rd_00466	0.0985669	±	0.000449516	0.062011	±	0.0034784	0.668579	212.536	193.868	0.132632
2.1.2.3	EIE91822.1	Rd_00467	0.127014	±	0.00235066	0.0797238	±	0.0048181	0.671908	226.421	208.617	0.118151
4.4.1.5	contig-100_9929_-0_max_po1	Rd_00468	n.d.	±	0	n.d.	±	0	-	-	-	-
4.4.1.5	EIE89264.1	Rd_00469	n.d.	±	0	n.d.	±	0	-	42.7474	48.9781	-0.196301
1.1.1.205	contig-100_2686_-1_max_po1	Rd_00470	0.130376	±	0.0200841	0.0359977	±	0.00501988	1.8567	349.42	139.122	1.32862
1.1.1.205	EIE84255.1	Rd_00471	n.d.	±	0	n.d.	±	0	-	108.367	42.9313	1.33582
1.1.1.205	EIE89751.1	Rd_00472	0.183647	±	0.0205758	0.076323	±	0.0210929	1.26675	282.23	110.541	1.35229
3.2.2.27	contig-100_5224_-2_max_po1	Rd_00473	n.d.	±	0	n.d.	±	0	-	-	-	-
3.2.2.27	EIE89585.1	Rd_00474	n.d.	±	0	n.d.	±	0	-	94.2497	91.7421	0.0389043
3.2.2.21	contig-100_6619_+1_max_po1	Rd_00475	n.d.	±	0	n.d.	±	0	-	-	-	-
3.2.2.21	EIE84499.1	Rd_00476	n.d.	±	0	n.d.	±	0	-	102.52	93.8493	0.127492
1.2.1.27	contig-100_2099_+2_max_po1	Rd_00477	0.0181867	±	0.00487224	0	±	0	100	138.521	124.71	0.151524
1.2.1.27	EIE87010.1	Rd_00478	0.0245783	±	0.00573534	0	±	0	100	149.447	132.843	0.169913
2.7.1.82	contig-100_4649_+1_max_po1	Rd_00479	n.d.	±	0	n.d.	±	0	-	-	-	-
3.2.1.21	EIE77281.1	Rd_00480	n.d.	±	0	n.d.	±	0	-	n.d.	n.d.	-
5.99.1.2	contig-100_246_-2_max_po1	Rd_00481	n.d.	±	0	n.d.	±	0	-	-	-	-
5.99.1.2	EIE78747.1	Rd_00482	n.d.	±	0	n.d.	±	0	-	12.5447	10.2079	0.297398
5.99.1.2	EIE81415.1	Rd_00483	n.d.	±	0	n.d.	±	0	-	20.2108	18.9443	0.093363
5.99.1.2	EIE85555.1	Rd_00484	n.d.	±	0	n.d.	±	0	-	336.486	270.723	0.31373
5.99.1.3	contig-100_150_-1_max_po1	Rd_00485	n.d.	±	0	n.d.	±	0	-	-	-	-
5.99.1.3	EIE84019.1	Rd_00486	n.d.	±	0	n.d.	±	0	-	60.5445	33.4184	0.857352
2.3.2.8	contig-100_4684_+1_max_po1	Rd_00487	n.d.	±	0	n.d.	±	0	-	-	-	-
2.3.2.2	contig-100_1230_-0_max_po1	Rd_00488	0.173844	±	0.0405354	0.0579741	±	0.0038766	1.58431	245.645	106.348	1.20778
2.3.2.2	contig-100_1779_-1_max_po1	Rd_00489	0.00670426	±	0.00144493	0	±	0	100	226.705	215.516	0.0730251
2.3.2.2	EIE79781.1	Rd_00490	0.208877	±	0.0323861	0.0700086	±	0.0027465	1.57705	233.536	105.262	1.14966
2.1.1.71	contig-100_8237_-2_max_po1	Rd_00491	n.d.	±	0	n.d.	±	0	-	-	-	-
2.1.1.71	EIE78584.1	Rd_00492	n.d.	±	0	n.d.	±	0	-	272.776	280.467	-0.0401169
2.1.1.77	contig-100_6621_+1_max_po1	Rd_00493	n.d.	±	0	n.d.	±	0	-	-	-	-
2.1.1.77	EIE81640.1	Rd_00494	n.d.	±	0	n.d.	±	0	-	20.5118	36.719	-0.840074
2.1.1.244	contig-100_7553_-2_max_po1	Rd_00495	n.d.	±	0	n.d.	±	0	-	-	-	-
2.1.1.244	EIE87624.1	Rd_00496	n.d.	±	0	n.d.	±	0	-	58.4204	66.7273	-0.191805
2.5.1.59	contig-100_5828_-2_max_po1	Rd_00497	n.d.	±	0	n.d.	±	0	-	-	-	-
4.1.2.4	contig-100_7556_+1_max_po1	Rd_00498	0.036382	±	0.0110713	0	±	0	100	86.1566	64.5671	0.416161
4.1.2.4	EIE88330.1	Rd_00499	0.0423682	±	0.0173168	0	±	0	100	88.9409	66.2671	0.424554
2.8.1.8	contig-100_1051_+1_max_po1	Rd_00500	n.d.	±	0	n.d.	±	0	-	-	-	-
2.8.1.8	EIE77277.1	Rd_00501	n.d.	±	0	n.d.	±	0	-	99.3571	121.264	-0.287457
2.8.1.8	EIE87647.1	Rd_00502	n.d.	±	0	n.d.	±	0	-	65.9171	64.3175	0.0354413
1.10.3.2	contig-100_1880_-0_max_po1	Rd_00503	0.67433	±	0.0728708	0.701615	±	0.139117	-0.0572237	2.50189	28.7766	-3.52381
1.10.3.2	EIE78767.1	Rd_00504	0.862025	±	0.0816168	0.813267	±	0.153546	0.0839996	2.40102	28.7905	-3.58387
2.8.1.1	contig-100_6277_+2_max_po1	Rd_00505	n.d.	±	0	n.d.	±	0	-	-	-	-
2.8.1.1	EIE81409.1	Rd_00506	n.d.	±	0	n.d.	±	0	-	308.68	250.147	0.303338
4.2.1.24	contig-100_4658_+0_max_po1	Rd_00507	0.281004	±	0.0293388	0.442627	±	0.0185579	-0.655502	181.844	301.807	-0.730923
4.2.1.24	EIE78699.1	Rd_00508	0.356572	±	0.0314565	0.594124	±	0.0514391	-0.736571	173.125	302.756	-0.806345
2.3.1.41	contig-100_2_-1_max_po1	Rd_00509	0.0532545	±	0.00537616	0.10982	±	0.00839825	-1.04416	110.402	196.888	-0.834611
2.3.1.41	EIE91460.1	Rd_00510	0.084381	±	0.0112705	0.132325	±	0.0124511	-0.649092	43.2619	68.9614	-0.672692
2.3.1.48	contig-100_402_+2_max_po1	Rd_00511	n.d.	±	0	n.d.	±	0	-	-	-	-
2.3.1.48	EIE77885.1	Rd_00512	n.d.	±	0	n.d.	±	0	-	19.3435	16.0467	0.269575
2.3.1.48	EIE82572.1	Rd_00513	n.d.	±	0	n.d.	±	0	-	25.643	17.308	0.567122
2.3.1.48	EIE88531.1	Rd_00514	n.d.	±	0	n.d.	±	0	-	30.1512	26.0532	0.210752
2.3.1.48	EIE88617.1	Rd_00515	n.d.	±	0	n.d.	±	0	-	118.813	112.29	0.0814672
2.3.1.48	EIE89177.1	Rd_00516	n.d.	±	0	n.d.	±	0	-	17.6472	10.9573	0.687544
2.3.1.48	EIE89546.1	Rd_00517	n.d.	±	0	n.d.	±	0	-	46.0415	37.0031	0.31529
2.7.8.7	contig-100_2_-1_max_po1	Rd_00518	0.0532545	±	0.00537616	0.10982	±	0.00839825	-1.04416	110.402	196.888	-0.834611
2.7.8.7	EIE76628.1	Rd_00519	0	±	0	0.0344398	±	0.00262849	-100	252.722	449.154	-0.829658
2.7.8.7	EIE91460.1	Rd_00520	0.084381	±	0.0112705	0.132325	±	0.0124511	-0.649092	43.2619	68.9614	-0.672692
2.7.8.8	contig-100_6661_+2_max_po1	Rd_00521	n.d.	±	0	n.d.	±	0	-	-	-	-
2.7.8.8	contig-100_8259_-1_max_po1	Rd_00522	0.0689408	±	0.0119922	0.101885	±	0.0267189	-0.563507	134.496	66.4909	1.01633
1.5.1.12	contig-100_1241_-1_max_po2	Rd_00523	0.27888	±	0.030744	0.286328	±	0.0273773	-0.038028	199.639	322.865	-0.693538
1.5.1.12	EIE76798.1	Rd_00524	0.386299	±	0.03965	0.386662	±	0.032477	-0.0013561	249.22	400.962	-0.686048
1.5.1.10	contig-100_3297_+1_max_po1	Rd_00525	0.165745	±	0.00481298	0.0936278	±	0.0150526	0.823955	161.946	261.961	-0.693837
1.5.1.10	EIE86315.1	Rd_00526	0.217887	±	0.00866369	0.124148	±	0.0139789	0.811521	161.063	259.943	-0.690572
3.1.3.25	contig-100_5188_-0_max_po1	Rd_00527	n.d.	±	0	n.d.	±	0	-	-	-	-
3.1.3.25	EIE81791.1	Rd_00528	n.d.	±	0	n.d.	±	0	-	171.006	143.563	0.252368
6.2.1.1	contig-100_1459_-0_max_po1	Rd_00529	0.00124102	±	0.000147058	0.0376229	±	0.00686323	-4.92202	57.6888	151.358	-1.3916
6.2.1.1	EIE81820.1	Rd_00530	n.d.	±	0	n.d.	±	0	-	441.939	67.6507	2.70767
6.2.1.1	EIE83430.1	Rd_00531	0.00213592	±	0.000692549	0.0487863	±	0.00775825	-4.51355	57.7271	149.133	-1.36928
3.2.1.28	contig-100_667_-0_max_po3	Rd_00532	n.d.	±	0	n.d.	±	0	-	-	-	-
3.2.1.28	EIE79310.1	Rd_00533	n.d.	±	0	n.d.	±	0	-	36.3112	39.5489	-0.123221
3.2.1.28	EIE88066.1	Rd_00534	n.d.	±	0	n.d.	±	0	-	84.3682	66.1474	0.351014
3.2.1.28	EIE91028.1	Rd_00535	n.d.	±	0	n.d.	±	0	-	39.5047	56.0794	-0.505448
2.7.4.6	contig-100_76_+1_max_po1	Rd_00536	n.d.	±	0	n.d.	±	0	-	-	-	-
2.7.4.6	contig-100_7587_+2_max_po1	Rd_00537	1.41911	±	0.234341	1.39523	±	0.200741	0.024479	728.233	303.726	1.26163
2.7.4.6	contig-100_11503_-1_max_po1	Rd_00538	0.49175	±	0.0144023	0.289414	±	0.0413351	0.76479	293.058	123.311	1.24889
2.7.4.6	EIE85744.1	Rd_00539	0.657896	±	0.0230794	0.492166	±	0.0438947	0.418713	302.265	123.43	1.29212
2.7.4.6	EIE86357.1	Rd_00540	1.40174	±	0.247167	1.16913	±	0.166966	0.261778	852.907	343.781	1.3109
2.7.4.7	contig-100_2258_-1_max_po1	Rd_00541	0.0997388	±	0.015996	0.101386	±	0.0242621	-0.0236318	299.959	354.332	-0.240335
2.7.4.7	EIE92514.1	Rd_00542	0.128626	±	0.0264405	0.0995055	±	0.0161706	0.370339	294.057	352.087	-0.259835
2.7.4.3	contig-100_1146_+0_max_po1	Rd_00543	n.d.	±	0	n.d.	±	0	-	-	-	-
2.7.4.3	contig-100_5199_-0_max_po1	Rd_00544	0	±	0	0.0123919	±	0.00279804	-100	242.095	134.291	0.850212
2.7.4.3	contig-100_5368_-1_max_po1	Rd_00545	0.0560339	±	0.00716708	0.0533684	±	0.0121964	0.0703136	546.372	1088.02	-0.993751
2.7.4.3	contig-100_6737_+1_max_po1	Rd_00546	0.0560339	±	0.00716708	0.107598	±	0.0145392	-0.941273	729.69	357.013	1.03131
2.7.4.3	contig-100_7596_+2_max_po1	Rd_00547	0.0240912	±	0.00532449	0.0294942	±	0.00519072	-0.291925	794.493	604.296	0.394777
2.7.4.3	EIE78283.1	Rd_00548	n.d.	±	0	n.d.	±	0	-	266.311	151.414	0.814617
2.7.4.3	EIE84602.1	Rd_00549	0	±	0	0.00580925	±	0.00291995	-100	279.79	154.288	0.858719
2.7.4.3	EIE87511.1	Rd_00550	0.167397	±	0.0218149	0.132948	±	0.0243989	0.332412	779.876	375.898	1.0529
2.7.4.3	EIE88297.1	Rd_00551	0.0272369	±	0.0037318	0.043928	±	0.00549462	-0.689575	881.708	663.16	0.410942
2.7.4.3	EIE88656.1	Rd_00552	0	±	0	0.0626824	±	0.0105769	-100	635.066	1301.57	-1.03527
2.7.6.2	contig-100_6622_+2_max_po1	Rd_00553	n.d.	±	0	n.d.	±	0	-	-	-	-
2.7.6.3	contig-100_334_-1_max_po1	Rd_00554	n.d.	±	0	n.d.	±	0	-	-	-	-
2.7.6.3	EIE86333.1	Rd_00555	n.d.	±	0	n.d.	±	0	-	36.1526	32.6194	0.148369
2.7.6.1	contig-100_660_+1_max_po1	Rd_00556	n.d.	±	0	n.d.	±	0	-	-	-	-
2.7.6.1	EIE76137.1	Rd_00557	n.d.	±	0	n.d.	±	0	-	129.435	96.1828	0.428381
2.7.6.1	EIE76983.1	Rd_00558	n.d.	±	0	n.d.	±	0	-	101.468	64.6768	0.649708
2.7.6.1	EIE79201.1	Rd_00559	n.d.	±	0	n.d.	±	0	-	71.9632	39.4818	0.866071
2.7.6.1	EIE80283.1	Rd_00560	n.d.	±	0	n.d.	±	0	-	34.1256	19.6455	0.79666
2.7.6.1	EIE88230.1	Rd_00561	n.d.	±	0	n.d.	±	0	-	272.099	148.024	0.878299
2.6.1.16	contig-100_13136_+1_max_po1	Rd_00562	n.d.	±	0	n.d.	±	0	-	-	-	-
2.6.1.16	EIE79542.1	Rd_00563	0.168056	±	0.0390656	0.189957	±	0.0159632	-0.176727	723.361	278.577	1.37664
2.6.1.16	EIE90096.1	Rd_00564	0	±	0	0.00495321	±	7.96115e-06	-100	428.934	151.814	1.49845
2.6.1.13	contig-100_2883_-1_max_po2	Rd_00565	0.269888	±	0.0259742	0.236211	±	0.0313764	0.192283	464.24	962.359	-1.05171
2.6.1.13	EIE87412.1	Rd_00566	0.375649	±	0.033506	0.295464	±	0.0199127	0.346404	516.733	1077.24	-1.05986
2.6.1.11	contig-100_1658_-1_max_po1	Rd_00567	0.0501091	±	0.00655685	0.104234	±	0.00257797	-1.05669	166.844	367.89	-1.14078
2.6.1.11	EIE77747.1	Rd_00568	0.073287	±	0.00824558	0.130891	±	0.00250449	-0.836733	122.246	419.944	-1.78041
2.6.1.19	contig-100_2960_+0_max_po1	Rd_00569	0.0283077	±	0.00187408	0.00410248	±	0.00276358	2.78662	212.789	366.563	-0.784639
2.6.1.19	EIE79910.1	Rd_00570	0.0520873	±	0.00162277	0.00749454	±	0.0049981	2.79702	218.439	370.84	-0.763566
1.1.1.271	contig-100_3917_+1_max_po1	Rd_00571	0.0816335	±	0.00391597	0.0171418	±	0.0117489	2.25164	516.746	463.983	0.155383
1.1.1.271	EIE82677.1	Rd_00572	0.103781	±	0.00184644	0.0232491	±	0.016567	2.15829	686.718	607.167	0.177623
1.2.1.38	contig-100_696_-0_max_po1	Rd_00573	0.0307109	±	0.00313882	0	±	0	100	284.226	423.362	-0.574856
1.2.1.38	EIE80230.1	Rd_00574	0.0393313	±	0.00184727	0	±	0	100	292.361	436.545	-0.578381
1.2.1.31	contig-100_104_+2_max_po1	Rd_00575	0.00278467	±	0.000342472	0	±	0	100	24.783	53.7452	-1.11678
1.2.1.31	EIE87722.1	Rd_00576	0.00312017	±	0.0005115	0	±	0	100	25.1629	53.8478	-1.09759
3.4.16.6	contig-100_1844_-0_max_po1	Rd_00577	n.d.	±	0	n.d.	±	0	-	-	-	-
2.7.2.8	contig-100_696_-0_max_po1	Rd_00578	0.0307109	±	0.00313882	0	±	0	100	284.226	423.362	-0.574856
2.7.2.8	EIE80230.1	Rd_00579	0.0393313	±	0.00184727	0	±	0	100	292.361	436.545	-0.578381
1.14.16.1	contig-100_562_+2_max_po1	Rd_00580	n.d.	±	0	n.d.	±	0	-	-	-	-
1.14.16.1	EIE83052.1	Rd_00581	n.d.	±	0	n.d.	±	0	-	29.6459	15.9287	0.896209
5.3.1.23	contig-100_4077_+0_max_po1	Rd_00582	n.d.	±	0	n.d.	±	0	-	-	-	-
5.3.1.23	EIE81164.1	Rd_00583	n.d.	±	0	n.d.	±	0	-	91.3686	60.5824	0.592799
4.1.1.48	contig-100_995_+0_max_po1	Rd_00584	0.00456746	±	0.00166464	0.00354475	±	0.0021155	0.365708	92.3928	141.564	-0.615597
4.1.1.48	EIE84071.1	Rd_00585	0.00591636	±	0.00258998	0.00415051	±	0.0023796	0.511421	92.9104	141.828	-0.610235
1.3.8.7	EIE75495.1	Rd_00586	n.d.	±	0	n.d.	±	0	-	9.99444	2.17111	2.2027
1.3.8.6	contig-100_3302_-1_max_po1	Rd_00587	0.0173731	±	0.00665098	0.0140283	±	0.00136139	0.308514	119.27	222.708	-0.900925
1.3.8.6	EIE76391.1	Rd_00588	0.0249808	±	0.00684881	0.0135466	±	0.00549858	0.882888	125.981	237.832	-0.916737
1.3.8.4	contig-100_3716_-2_max_po1	Rd_00589	n.d.	±	0	n.d.	±	0	-	-	-	-
1.3.8.4	EIE90672.1	Rd_00590	n.d.	±	0	n.d.	±	0	-	94.116	70.6864	0.413007
1.1.1.95	contig-100_2663_-2_max_po1	Rd_00591	0	±	0	0.0045013	±	0.00198773	-100	10.7829	95.8754	-3.15242
1.1.1.95	contig-100_3563_-2_max_po1	Rd_00592	0.0825138	±	0.00621843	0.171168	±	0.02468	-1.05271	178.529	873.559	-2.29075
1.1.1.95	EIE77334.1	Rd_00593	0	±	0	0.00583785	±	0.00257518	-100	11.4296	103.404	-3.17743
1.1.1.95	EIE79472.1	Rd_00594	0.109677	±	0.00225427	0.220163	±	0.037533	-1.00531	180.129	873.836	-2.27833
1.2.1.3	contig-100_1_+1_po1	Rd_00595	0.157509	±	0.0133173	0.0159951	±	0.00621322	3.29973	137.667	107.098	0.362253
1.2.1.3	contig-100_2510_+2_max_po1	Rd_00596	0.0114446	±	0.000836757	0	±	0	100	468.157	6.11987	6.25735
1.2.1.3	contig-100_3895_-0_max_po1	Rd_00597	0.157509	±	0.0133173	0.0159951	±	0.00621322	3.29973	54.6672	61.7158	-0.174965
1.2.1.3	EIE77325.1	Rd_00598	0.0319797	±	0.0142984	0.0177826	±	0.00806235	0.846693	55.2844	60.7692	-0.136468
1.2.1.3	EIE85473.1	Rd_00599	0.0107899	±	0.00191432	0	±	0	100	486.899	6.32326	6.26681
1.2.1.3	EIE90663.1	Rd_00600	0.0107899	±	0.00191432	0	±	0	100	3.29697	0.0533722	5.94891
3.5.1.5	contig-100_758_+0_max_po1	Rd_00601	0.130557	±	0.00307588	0.00797322	±	0.00412428	4.03338	287.659	157.645	0.86768
3.5.1.5	EIE81784.1	Rd_00602	0.143021	±	0.00298822	0.0122268	±	0.00639168	3.54811	299.259	161.095	0.893479
4.2.1.19	contig-100_8112_+0_max_po1	Rd_00603	0.0770021	±	0.0191296	0.0391995	±	0.00257269	0.974062	143.937	127.515	0.174769
4.2.1.19	EIE76696.1	Rd_00604	0.0669485	±	0.0156246	0.0355932	±	0.00188137	0.91145	97.8973	93.2359	0.0703827
6.3.4.14	EIE80272.1	Rd_00605	0.00838663	±	0.00128919	0.0109311	±	0.0014336	-0.382282	49.8777	24.6949	1.01418
6.3.4.15	contig-100_1508_+2_max_po1	Rd_00606	n.d.	±	0	n.d.	±	0	-	-	-	-
6.3.4.15	EIE82620.1	Rd_00607	n.d.	±	0	n.d.	±	0	-	53.3422	47.5693	0.165248
6.3.4.13	contig-100_939_-0_max_po1	Rd_00608	0.00219504	±	0.0015083	0	±	0	100	95.331	56.2914	0.760031
6.3.4.13	EIE91602.1	Rd_00609	0.00261384	±	0.00177797	0	±	0	100	87.8158	52.1115	0.752879
4.2.1.10	contig-100_49_-1_max_po1	Rd_00610	0.00220106	±	0.000491599	0.00584768	±	0.0031268	-1.40967	38.8157	67.893	-0.806622
4.2.1.10	EIE85491.1	Rd_00611	0.00312603	±	0.000962128	0.00772556	±	0.00339004	-1.30531	39.4182	67.0823	-0.767072
4.2.1.11	contig-100_3268_-1_max_po1	Rd_00612	0.0162887	±	0.00354798	0.0253819	±	0.00518973	-0.639927	4.33357	88.0027	-4.34392
4.2.1.11	contig-100_3303_-2_max_po1	Rd_00613	16.2431	±	2.58319	24.3088	±	0.815857	-0.581651	9555.39	17033	-0.83395
4.2.1.11	EIE80761.1	Rd_00614	0.0202738	±	0.00453854	0.0310505	±	0.00823946	-0.614996	4.35698	88.444	-4.34336
4.2.1.11	EIE87278.1	Rd_00615	13.9753	±	0.383061	25.2579	±	0.347735	-0.853855	9392.99	16981.7	-0.854325
6.3.2.19	contig-100_2930_-1_max_po1	Rd_00616	n.d.	±	0	n.d.	±	0	-	-	-	-
6.3.2.19	contig-100_7848_-1_max_po1	Rd_00617	0.0333122	±	0.0248431	0.0412828	±	0.00684448	-0.309491	512.633	427.094	0.263372
6.3.2.19	contig-100_8530_+1_max_po1	Rd_00618	0.0333122	±	0.0248431	0.0412828	±	0.00684448	-0.309491	869.239	572.769	0.6018
6.3.2.19	contig-100_9073_-1_max_po1	Rd_00619	0.00826637	±	3.76356e-05	0	±	0	100	317.336	238.538	0.411792
6.3.2.19	EIE79235.1	Rd_00620	0.00928418	±	0.000718953	0	±	0	100	367.86	271.022	0.440745
6.3.2.19	EIE79391.1	Rd_00621	n.d.	±	0	n.d.	±	0	-	38.2832	17.1222	1.16085
6.3.2.19	EIE79454.1	Rd_00622	n.d.	±	0	n.d.	±	0	-	391.724	356.898	0.134327
6.3.2.19	EIE79687.1	Rd_00623	0.0863513	±	0.0611778	0.10112	±	0.0160548	-0.227778	980.506	667.948	0.553791
6.3.2.19	EIE81171.1	Rd_00624	n.d.	±	0	n.d.	±	0	-	148.533	101.592	0.54799
6.3.2.19	EIE81470.1	Rd_00625	n.d.	±	0	n.d.	±	0	-	216.253	219.809	-0.0235367
6.3.2.19	EIE82645.1	Rd_00626	n.d.	±	0	n.d.	±	0	-	130.515	150.365	-0.204251
6.3.2.19	EIE83822.1	Rd_00627	n.d.	±	0	n.d.	±	0	-	60.1567	56.5292	0.0897284
6.3.2.19	EIE88727.1	Rd_00628	n.d.	±	0	n.d.	±	0	-	177.084	159.774	0.148399
6.3.2.19	EIE88903.1	Rd_00629	n.d.	±	0	n.d.	±	0	-	114.587	89.6939	0.353362
6.3.2.19	EIE89359.1	Rd_00630	n.d.	±	0	n.d.	±	0	-	100.154	56.8434	0.817158
6.3.2.19	EIE90596.1	Rd_00631	n.d.	±	0	n.d.	±	0	-	81.6641	64.1544	0.348154
6.3.2.19	EIE91493.1	Rd_00632	n.d.	±	0	n.d.	±	0	-	217.043	149.692	0.535988
3.1.2.1	contig-100_1398_-1_max_po1	Rd_00633	0.000556426	±	0.000379681	0.00659599	±	0.000238692	-3.56733	232.984	12.4913	4.22124
3.1.2.1	contig-100_2179_+2_max_po1	Rd_00634	0.0353099	±	0.00325635	0.0120687	±	0.00231972	1.5488	205.787	158.112	0.3802
3.1.2.1	EIE79584.1	Rd_00635	0	±	0	0.00816793	±	0.000300586	-100	263.973	13.6796	4.2703
3.1.2.1	EIE80175.1	Rd_00636	0.0635258	±	0.00595568	0.0184122	±	0.00327262	1.78668	206.508	158.961	0.377526
1.1.99.24	contig-100_436_+2_max_po1	Rd_00637	n.d.	±	0	n.d.	±	0	-	-	-	-
1.1.99.24	EIE84356.1	Rd_00638	n.d.	±	0	n.d.	±	0	-	20.7373	1.67914	3.62644
3.4.24.59	contig-100_1000_-0_max_po1	Rd_00639	n.d.	±	0	n.d.	±	0	-	-	-	-
3.4.24.59	EIE89521.1	Rd_00640	n.d.	±	0	n.d.	±	0	-	29.9426	23.8186	0.330111
2.3.1.51	contig-100_3819_-1_max_po1	Rd_00641	n.d.	±	0	n.d.	±	0	-	-	-	-
2.3.1.51	EIE75950.1	Rd_00642	n.d.	±	0	n.d.	±	0	-	36.4516	19.6939	0.888232
2.3.1.51	EIE76951.1	Rd_00643	n.d.	±	0	n.d.	±	0	-	302.84	146.057	1.05202
2.3.1.50	contig-100_1901_-0_max_po1	Rd_00644	n.d.	±	0	n.d.	±	0	-	-	-	-
2.3.1.50	EIE85063.1	Rd_00645	n.d.	±	0	n.d.	±	0	-	399.063	447.704	-0.165929
2.3.1.50	EIE88938.1	Rd_00646	n.d.	±	0	n.d.	±	0	-	87.4007	58.4522	0.580387
2.7.11.13	contig-100_368_-0_max_po1	Rd_00647	n.d.	±	0	n.d.	±	0	-	-	-	-
2.7.11.13	EIE81373.1	Rd_00648	0.000598708	±	0.000103173	0.00253462	±	0.000766595	-2.08185	120.031	93.4655	0.360899
2.7.11.13	EIE87218.1	Rd_00649	n.d.	±	0	n.d.	±	0	-	79.2075	63.5987	0.31664
2.7.11.13	EIE89796.1	Rd_00650	n.d.	±	0	n.d.	±	0	-	54.0141	38.2185	0.499063
2.7.11.13	EIE90320.1	Rd_00651	0.000598708	±	0.000103173	0.00253462	±	0.000766595	-2.08185	52.442	44.9168	0.223469
3.1.3.16	contig-100_18_-0_max_po1	Rd_00652	n.d.	±	0	n.d.	±	0	-	-	-	-
3.1.3.16	contig-100_2516_-1_max_po1	Rd_00653	0	±	0	0.000692776	±	2.15747e-05	-100	121.127	61.0787	0.987774
3.1.3.16	contig-100_3544_-2_max_po1	Rd_00654	0	±	0	0.000692776	±	2.15747e-05	-100	104.412	104.698	-0.00395189
3.1.3.16	EIE75798.1	Rd_00655	n.d.	±	0	n.d.	±	0	-	9.49351	2.41821	1.973
3.1.3.16	EIE75824.1	Rd_00656	0.103747	±	0.0320292	0.0349683	±	0.00120783	1.56895	293.648	244.533	0.264058
3.1.3.16	EIE75924.1	Rd_00657	n.d.	±	0	n.d.	±	0	-	34.516	35.6233	-0.0455571
3.1.3.16	EIE76149.1	Rd_00658	n.d.	±	0	n.d.	±	0	-	45.6792	32.1469	0.506856
3.1.3.16	EIE76698.1	Rd_00659	n.d.	±	0	n.d.	±	0	-	172.881	75.4721	1.19576
3.1.3.16	EIE76741.1	Rd_00660	n.d.	±	0	n.d.	±	0	-	169.49	260.413	-0.619598
3.1.3.16	EIE76837.1	Rd_00661	n.d.	±	0	n.d.	±	0	-	126.029	73.4944	0.778049
3.1.3.16	EIE77861.1	Rd_00662	n.d.	±	0	n.d.	±	0	-	68.8875	40.0047	0.784073
3.1.3.16	EIE78168.1	Rd_00663	n.d.	±	0	n.d.	±	0	-	13.9617	12.8834	0.115966
3.1.3.16	EIE79250.1	Rd_00664	n.d.	±	0	n.d.	±	0	-	94.9449	55.6626	0.770382
3.1.3.16	EIE79392.1	Rd_00665	n.d.	±	0	n.d.	±	0	-	36.2623	25.8973	0.48567
3.1.3.16	EIE79468.1	Rd_00666	n.d.	±	0	n.d.	±	0	-	136.811	61.6828	1.14924
3.1.3.16	EIE79837.1	Rd_00667	n.d.	±	0	n.d.	±	0	-	32.1101	35.1384	-0.130024
3.1.3.16	EIE80294.1	Rd_00668	n.d.	±	0	n.d.	±	0	-	20.0308	13.3029	0.590482
3.1.3.16	EIE81744.1	Rd_00669	n.d.	±	0	n.d.	±	0	-	31.9432	19.9335	0.680316
3.1.3.16	EIE82148.1	Rd_00670	n.d.	±	0	n.d.	±	0	-	387.909	235.749	0.718468
3.1.3.16	EIE82250.1	Rd_00671	n.d.	±	0	n.d.	±	0	-	71.0208	55.2344	0.362673
3.1.3.16	EIE82758.1	Rd_00672	n.d.	±	0	n.d.	±	0	-	16.8432	9.40437	0.840764
3.1.3.16	EIE84226.1	Rd_00673	0.12197	±	0.043414	0.0743619	±	0.0116452	0.713891	300.718	235.99	0.34969
3.1.3.16	EIE84443.1	Rd_00674	n.d.	±	0	n.d.	±	0	-	78.7667	69.734	0.175724
3.1.3.16	EIE85572.1	Rd_00675	n.d.	±	0	n.d.	±	0	-	125.951	156.796	-0.316032
3.1.3.16	EIE87418.1	Rd_00676	n.d.	±	0	n.d.	±	0	-	84.9766	58.6086	0.535953
3.1.3.16	EIE87630.1	Rd_00677	0.00123005	±	8.7267e-05	0.000924103	±	3.89474e-05	0.412596	97.2565	96.3114	0.0140891
3.1.3.16	EIE88121.1	Rd_00678	n.d.	±	0	n.d.	±	0	-	221.149	153.647	0.525399
3.1.3.16	EIE88674.1	Rd_00679	0.00123005	±	8.7267e-05	0.000924103	±	3.89474e-05	0.412596	142.186	71.0165	1.00155
3.1.3.16	EIE89681.1	Rd_00680	n.d.	±	0	n.d.	±	0	-	23.8449	26.9442	-0.176293
3.1.3.16	EIE89788.1	Rd_00681	0.103747	±	0.0320292	0.0294375	±	0.000404053	1.81735	124.916	97.7254	0.354154
3.1.3.16	EIE90244.1	Rd_00682	n.d.	±	0	n.d.	±	0	-	157.468	148.369	0.085868
3.1.3.16	EIE90392.1	Rd_00683	n.d.	±	0	n.d.	±	0	-	48.1434	44.6593	0.108378
3.1.3.16	EIE91508.1	Rd_00684	0.0195007	±	0.000370734	0.0731403	±	0.011514	-1.90714	222.024	184.747	0.265168
3.1.3.16	EIE91567.1	Rd_00685	n.d.	±	0	n.d.	±	0	-	114.392	91.2674	0.325817
3.1.3.16	EIE91624.1	Rd_00686	n.d.	±	0	n.d.	±	0	-	52.0344	55.1062	-0.0827503
3.1.3.16	EIE91728.1	Rd_00687	n.d.	±	0	n.d.	±	0	-	104.818	69.7733	0.587133
3.1.3.15	contig-100_8112_+0_max_po1	Rd_00688	0.0770021	±	0.0191296	0.0391995	±	0.00257269	0.974062	143.937	127.515	0.174769
3.1.3.15	EIE76696.1	Rd_00689	0.0669485	±	0.0156246	0.0355932	±	0.00188137	0.91145	97.8973	93.2359	0.0703827
3.1.3.12	contig-100_196_+1_max_po1	Rd_00690	n.d.	±	0	n.d.	±	0	-	-	-	-
3.1.3.12	EIE82678.1	Rd_00691	0.000945418	±	0.000725508	0.000228649	±	3.54711e-05	2.04782	113.669	196.008	-0.786072
3.1.3.12	EIE85198.1	Rd_00692	n.d.	±	0	n.d.	±	0	-	33.8039	38.2703	-0.179034
3.1.3.12	EIE86485.1	Rd_00693	n.d.	±	0	n.d.	±	0	-	153.733	158.116	-0.0405574
3.1.3.12	EIE88419.1	Rd_00694	n.d.	±	0	n.d.	±	0	-	7.6355	5.26722	0.535682
3.1.3.12	EIE89882.1	Rd_00695	n.d.	±	0	n.d.	±	0	-	23.9565	38.5437	-0.686079
3.1.3.11	EIE82955.1	Rd_00696	n.d.	±	0	n.d.	±	0	-	3.15438	0.481767	2.71095
3.1.3.11	EIE88636.1	Rd_00697	n.d.	±	0	n.d.	±	0	-	30.0266	2.73809	3.455
2.4.2.28	contig-100_5702_-0_max_po1	Rd_00698	0.183178	±	0.0165678	0.0519341	±	0.0142967	1.8185	541.213	224.592	1.26889
2.4.2.28	EIE81317.1	Rd_00699	0.293797	±	0.0293677	0.0830643	±	0.0160482	1.82252	581.638	233.82	1.31472
2.4.2.29	contig-100_4759_+0_max_po1	Rd_00700	n.d.	±	0	n.d.	±	0	-	-	-	-
2.7.8.15	contig-100_3226_-2_max_po1	Rd_00701	n.d.	±	0	n.d.	±	0	-	-	-	-
2.7.8.15	EIE85486.1	Rd_00702	n.d.	±	0	n.d.	±	0	-	28.8966	30.3946	-0.072916
2.7.11.11	contig-100_1626_+1_max_po1	Rd_00703	n.d.	±	0	n.d.	±	0	-	-	-	-
2.7.11.11	EIE77346.1	Rd_00704	n.d.	±	0	n.d.	±	0	-	44.6937	33.7424	0.405512
2.7.11.11	EIE77928.1	Rd_00705	n.d.	±	0	n.d.	±	0	-	55.1483	45.9307	0.263857
2.7.11.11	EIE79161.1	Rd_00706	n.d.	±	0	n.d.	±	0	-	41.1809	85.6978	-1.05728
2.7.11.11	EIE79870.1	Rd_00707	n.d.	±	0	n.d.	±	0	-	80.7414	57.4449	0.491129
2.7.11.11	EIE86969.1	Rd_00708	n.d.	±	0	n.d.	±	0	-	105.804	65.0718	0.701286
2.7.11.11	EIE91763.1	Rd_00709	n.d.	±	0	n.d.	±	0	-	36.5043	29.0639	0.328841
2.7.11.11	EIE92485.1	Rd_00710	n.d.	±	0	n.d.	±	0	-	89.1369	67.4756	0.401656
3.5.99.6	contig-100_716_+0_max_po1	Rd_00711	n.d.	±	0	n.d.	±	0	-	-	-	-
3.5.99.6	contig-100_7281_+0_max_po1	Rd_00712	0.0182292	±	0.00875557	0	±	0	100	32.9385	34.8502	-0.0813941
3.5.99.6	EIE77702.1	Rd_00713	n.d.	±	0	n.d.	±	0	-	5.27	2.49515	1.07868
3.5.99.6	EIE82673.1	Rd_00714	0.0315541	±	0.00380399	0	±	0	100	34.3177	36.709	-0.097181
3.5.99.6	EIE89580.1	Rd_00715	n.d.	±	0	n.d.	±	0	-	81.8067	55.1602	0.568591
2.7.1.150	contig-100_2742_-2_max_po1	Rd_00716	n.d.	±	0	n.d.	±	0	-	-	-	-
2.7.1.150	EIE85857.1	Rd_00717	n.d.	±	0	n.d.	±	0	-	12.6374	11.4362	0.144097
5.1.3.1	contig-100_3084_+1_max_po1	Rd_00718	n.d.	±	0	n.d.	±	0	-	-	-	-
5.1.3.1	EIE84040.1	Rd_00719	n.d.	±	0	n.d.	±	0	-	277.568	248.943	0.157025
2.7.11.22	contig-100_400_-0_max_po1	Rd_00720	n.d.	±	0	n.d.	±	0	-	-	-	-
2.7.11.22	EIE77492.1	Rd_00721	n.d.	±	0	n.d.	±	0	-	55.9069	44.8013	0.319484
2.7.11.22	EIE79443.1	Rd_00722	n.d.	±	0	n.d.	±	0	-	29.5278	28.088	0.0721193
2.7.11.22	EIE81290.1	Rd_00723	n.d.	±	0	n.d.	±	0	-	89.2621	109.988	-0.301226
2.7.11.22	EIE87771.1	Rd_00724	n.d.	±	0	n.d.	±	0	-	67.0581	73.2937	-0.128277
2.7.11.22	EIE87775.1	Rd_00725	n.d.	±	0	n.d.	±	0	-	89.2773	58.0434	0.621162
2.7.11.22	EIE88784.1	Rd_00726	n.d.	±	0	n.d.	±	0	-	32.5392	16.6611	0.965697
2.7.11.22	EIE89899.1	Rd_00727	n.d.	±	0	n.d.	±	0	-	29.0053	24.3215	0.254089
2.7.11.22	EIE91553.1	Rd_00728	n.d.	±	0	n.d.	±	0	-	105.444	109.094	-0.0490947
2.7.7.80	contig-100_1183_+0_max_po1	Rd_00729	n.d.	±	0	n.d.	±	0	-	-	-	-
1.2.1.41	contig-100_3859_+0_max_po1	Rd_00730	0.00852641	±	0.00101147	0.00751741	±	0.00120617	0.181703	79.5715	46.5962	0.77204
1.2.1.41	EIE81931.1	Rd_00731	0.0119999	±	0.0014659	0.00948237	±	0.0020736	0.339704	86.1851	48.5516	0.827919
1.11.1.5	contig-100_3589_-1_max_po1	Rd_00732	n.d.	±	0	n.d.	±	0	-	-	-	-
1.11.1.5	EIE76890.1	Rd_00733	n.d.	±	0	n.d.	±	0	-	218.165	73.9481	1.56083
3.2.1.99	contig-100_5698_-2_max_po1	Rd_00734	n.d.	±	0	n.d.	±	0	-	-	-	-
3.2.1.99	EIE92072.1	Rd_00735	n.d.	±	0	n.d.	±	0	-	34.672	2.08714	4.05417
3.2.1.99	EIE92073.1	Rd_00736	n.d.	±	0	n.d.	±	0	-	34.0288	1.6941	4.32816
4.1.1.50	contig-100_2989_-2_max_po1	Rd_00737	n.d.	±	0	n.d.	±	0	-	-	-	-
4.1.1.50	EIE77853.1	Rd_00738	n.d.	±	0	n.d.	±	0	-	90.3702	74.7642	0.273499
4.1.1.50	EIE80992.1	Rd_00739	n.d.	±	0	n.d.	±	0	-	101.687	66.4581	0.613616
1.1.1.85	contig-100_1932_-2_max_po1	Rd_00740	0.0328565	±	0.00289565	0.010006	±	0.0030929	1.71531	84.0628	134.449	-0.67752
1.1.1.85	EIE78363.1	Rd_00741	0.0332986	±	0.00342831	0.0172423	±	0.00197096	0.949511	62.752	170.437	-1.4415
1.1.1.87	contig-100_4429_+2_max_po1	Rd_00742	0.0139232	±	0.00190337	0.0309908	±	0.00816792	-1.15434	28.655	218.108	-2.92819
1.1.1.87	EIE86311.1	Rd_00743	0.0167011	±	0.00167414	0.040519	±	0.00449662	-1.27866	28.3636	218.52	-2.94565
1.1.1.86	contig-100_3649_+0_max_po1	Rd_00744	0.0104763	±	1.0228e-05	0.00315141	±	0.000697235	1.73306	803.428	1425.24	-0.826961
1.1.1.86	EIE78347.1	Rd_00745	0.00796147	±	0.000982883	0.00239717	±	0.000866784	1.7317	622.071	1138.13	-0.871514
1.1.1.86	EIE85923.1	Rd_00746	0.00796147	±	0.000982883	0.00239717	±	0.000866784	1.7317	381.712	543.431	-0.509614
5.4.99.5	contig-100_4318_-1_max_po1	Rd_00747	n.d.	±	0	n.d.	±	0	-	-	-	-
5.4.99.5	EIE83471.1	Rd_00748	n.d.	±	0	n.d.	±	0	-	203.686	92.7332	1.13519
2.4.1.265	contig-100_10571_-0_max_po1	Rd_00749	n.d.	±	0	n.d.	±	0	-	-	-	-
2.4.1.267	EIE81183.1	Rd_00750	n.d.	±	0	n.d.	±	0	-	15.0783	10.881	0.470671
5.4.99.27	contig-100_1840_+2_max_po1	Rd_00751	n.d.	±	0	n.d.	±	0	-	-	-	-
5.4.99.25	contig-100_4409_-0_max_po1	Rd_00752	n.d.	±	0	n.d.	±	0	-	-	-	-
5.4.99.25	EIE84293.1	Rd_00753	n.d.	±	0	n.d.	±	0	-	30.4245	23.9458	0.345462
2.1.1.17	contig-100_538_+2_max_po1	Rd_00754	n.d.	±	0	n.d.	±	0	-	-	-	-
2.1.1.17	EIE78584.1	Rd_00755	n.d.	±	0	n.d.	±	0	-	272.776	280.467	-0.0401169
2.1.1.17	EIE84426.1	Rd_00756	n.d.	±	0	n.d.	±	0	-	39.2802	22.3798	0.811606
2.1.1.14	contig-100_6330_+0_max_po1	Rd_00757	n.d.	±	0	n.d.	±	0	-	-	-	-
2.1.1.14	EIE80214.1	Rd_00758	0.130621	±	0.0217804	0.330637	±	0.0310531	-1.33987	153.502	325.221	-1.08316
2.1.1.14	EIE92418.1	Rd_00759	0.02261	±	0.0019747	0.0524584	±	0.00877596	-1.21421	191.38	282.997	-0.564347
2.1.1.13	contig-100_192_-0_max_po1	Rd_00760	n.d.	±	0	n.d.	±	0	-	-	-	-
2.1.1.13	EIE86208.1	Rd_00761	n.d.	±	0	n.d.	±	0	-	26.2627	20.7251	0.341642
2.1.1.10	contig-100_4842_+2_max_po1	Rd_00762	n.d.	±	0	n.d.	±	0	-	-	-	-
5.3.1.24	contig-100_995_+0_max_po1	Rd_00763	0.00456746	±	0.00166464	0.00354475	±	0.0021155	0.365708	92.3928	141.564	-0.615597
5.3.1.24	EIE84071.1	Rd_00764	0.00591636	±	0.00258998	0.00415051	±	0.0023796	0.511421	92.9104	141.828	-0.610235
3.4.21.89	contig-100_9092_-2_max_po1	Rd_00765	0.0127659	±	0.00329278	0.0544951	±	0.0188039	-2.09384	150.07	94.2472	0.67111
3.4.21.89	EIE84430.1	Rd_00766	0.0169865	±	0.00211922	0.0513517	±	0.0111393	-1.59602	156.825	97.2884	0.688813
4.2.1.47	contig-100_4196_-1_max_po1	Rd_00767	0.0771072	±	0.00159924	0.0585704	±	0.00509901	0.396693	432.583	432.507	0.000254194
4.2.1.47	contig-100_4307_-2_max_po1	Rd_00768	0.0100808	±	0.000451645	0.00280749	±	0.000175774	1.84425	437.807	346.799	0.336196
4.2.1.47	contig-100_5269_+0_max_po1	Rd_00769	0.0771072	±	0.00159924	0.0585704	±	0.00509901	0.396693	165.647	106.408	0.638505
4.2.1.47	EIE80939.1	Rd_00770	0.108141	±	0.00510934	0.0639536	±	0.00494751	0.757821	176.993	113.716	0.638254
4.2.1.47	EIE87342.1	Rd_00771	0.0143241	±	0.00233063	0.0033186	±	0.000209821	2.1098	448.087	351.471	0.350374
4.2.1.47	EIE91197.1	Rd_00772	0.108141	±	0.00510934	0.0639536	±	0.00494751	0.757821	451.352	452.422	-0.003416
4.2.1.46	EIE75478.1	Rd_00773	n.d.	±	0	n.d.	±	0	-	168.696	87.7836	0.942401
4.1.1.1	EIE77072.1	Rd_00774	3.47006	±	0.156582	10.8822	±	0.214697	-1.64894	2022.03	13299.3	-2.71747
4.1.1.1	EIE87654.1	Rd_00775	0.232254	±	0.0107935	0.386788	±	0.0674164	-0.735843	254.189	700.736	-1.46297
3.5.1.52	contig-100_2356_+0_max_po1	Rd_00776	n.d.	±	0	n.d.	±	0	-	-	-	-
2.2.1.1	contig-100_1243_-2_max_po1	Rd_00777	0.0794659	±	0.00896448	0.105257	±	0.0230867	-0.405508	176.208	123.827	0.508952
2.2.1.1	contig-100_3838_+2_max_po1	Rd_00778	0.00255967	±	0.00136993	0.00650171	±	0.0012903	-1.34486	18.0437	17.7112	0.0268397
2.2.1.1	EIE80972.1	Rd_00779	0.0032192	±	0.000188305	0.0113494	±	0.00286525	-1.81785	14.0957	14.8106	-0.0713718
2.2.1.1	EIE88356.1	Rd_00780	0.129401	±	0.015839	0.13458	±	0.0294152	-0.0566075	175.812	122.302	0.523592
2.2.1.6	contig-100_714_+1_max_po3	Rd_00781	n.d.	±	0	n.d.	±	0	-	-	-	-
2.2.1.6	EIE78181.1	Rd_00782	n.d.	±	0	n.d.	±	0	-	237.225	123.791	0.938347
2.2.1.6	EIE78362.1	Rd_00783	n.d.	±	0	n.d.	±	0	-	78.3664	194.094	-1.30845
2.2.1.6	EIE86866.1	Rd_00784	n.d.	±	0	n.d.	±	0	-	20.1678	182.958	-3.18139
2.4.1.109	contig-100_813_+0_max_po1	Rd_00785	n.d.	±	0	n.d.	±	0	-	-	-	-
2.4.1.109	contig-100_1427_-0_max_po1	Rd_00786	0	±	0	0.0104126	±	0.00541048	-100	66.926	46.1462	0.536354
2.4.1.109	EIE75308.1	Rd_00787	n.d.	±	0	n.d.	±	0	-	58.6645	76.7652	-0.387964
2.4.1.109	EIE80579.1	Rd_00788	n.d.	±	0	n.d.	±	0	-	77.7259	50.3812	0.62551
6.1.1.12	contig-100_2130_+1_max_po1	Rd_00789	n.d.	±	0	n.d.	±	0	-	-	-	-
6.1.1.12	EIE77274.1	Rd_00790	n.d.	±	0	n.d.	±	0	-	15.5273	18.0473	-0.216971
6.1.1.12	EIE79914.1	Rd_00791	n.d.	±	0	n.d.	±	0	-	92.6151	72.6285	0.350711
6.1.1.12	EIE80753.1	Rd_00792	n.d.	±	0	n.d.	±	0	-	16.1212	100.702	-2.64306
6.1.1.11	contig-100_2879_+1_max_po1	Rd_00793	n.d.	±	0	n.d.	±	0	-	-	-	-
6.1.1.11	EIE81583.1	Rd_00794	n.d.	±	0	n.d.	±	0	-	26.3762	19.398	0.443328
6.1.1.11	EIE85494.1	Rd_00795	n.d.	±	0	n.d.	±	0	-	290.546	220.234	0.399726
6.1.1.11	EIE87608.1	Rd_00796	n.d.	±	0	n.d.	±	0	-	22.5773	23.312	-0.0462036
6.1.1.10	contig-100_904_-2_max_po1	Rd_00797	n.d.	±	0	n.d.	±	0	-	-	-	-
6.1.1.10	EIE76164.1	Rd_00798	n.d.	±	0	n.d.	±	0	-	49.4214	39.0205	0.340904
6.1.1.17	contig-100_2682_+2_max_po1	Rd_00799	n.d.	±	0	n.d.	±	0	-	-	-	-
6.1.1.17	EIE79618.1	Rd_00800	n.d.	±	0	n.d.	±	0	-	141.545	111.246	0.347503
6.1.1.17	EIE81750.1	Rd_00801	n.d.	±	0	n.d.	±	0	-	30.612	20.6088	0.570838
6.1.1.17	EIE84599.1	Rd_00802	n.d.	±	0	n.d.	±	0	-	108.485	177.037	-0.70656
6.1.1.16	contig-100_789_+0_max_po1	Rd_00803	n.d.	±	0	n.d.	±	0	-	-	-	-
6.1.1.16	EIE80943.1	Rd_00804	0.00151924	±	0.00124733	0	±	0	100	93.115	145.3	-0.641952
6.1.1.19	contig-100_1131_+2_max_po1	Rd_00805	0	±	0	0.00901732	±	0.00477787	-100	89.0585	135.943	-0.610173
6.1.1.19	EIE86048.1	Rd_00806	0.00497682	±	0.00107507	0.00572012	±	0.000203989	-0.200819	14.4435	7.96162	0.859285
6.1.1.19	EIE91573.1	Rd_00807	0	±	0	0.00950652	±	0.00586086	-100	89.8666	136.035	-0.598125
2.4.2.30	contig-100_680_+1_max_po1	Rd_00808	n.d.	±	0	n.d.	±	0	-	-	-	-
2.4.2.30	EIE80250.1	Rd_00809	n.d.	±	0	n.d.	±	0	-	7.39211	4.12919	0.840128
6.1.1.9	contig-100_449_+0_max_po1	Rd_00810	n.d.	±	0	n.d.	±	0	-	-	-	-
6.1.1.9	contig-100_461_-0_max_po1	Rd_00811	0.00331486	±	0.000716899	0	±	0	100	78.543	88.7017	-0.175479
6.1.1.9	EIE76038.1	Rd_00812	0.00458012	±	0.000914173	0	±	0	100	79.6714	88.8054	-0.156586
6.1.1.7	contig-100_537_+1_max_po1	Rd_00813	0.00556012	±	0.000114173	0.00823398	±	0.00463869	-0.566473	118.987	108.451	0.133752
6.1.1.7	EIE81660.1	Rd_00814	n.d.	±	0	n.d.	±	0	-	12.4864	13.148	-0.0744841
6.1.1.7	EIE82853.1	Rd_00815	0.00842726	±	0.00142054	0.0109162	±	0.00646145	-0.373334	120.55	108.508	0.151824
6.1.1.7	EIE91316.1	Rd_00816	n.d.	±	0	n.d.	±	0	-	95.0535	68.477	0.473121
6.1.1.5	contig-100_359_+2_max_po1	Rd_00817	n.d.	±	0	n.d.	±	0	-	-	-	-
6.1.1.5	EIE87442.1	Rd_00818	n.d.	±	0	n.d.	±	0	-	118.042	132.263	-0.164109
6.1.1.4	contig-100_356_+0_max_po1	Rd_00819	n.d.	±	0	n.d.	±	0	-	-	-	-
6.1.1.4	EIE84714.1	Rd_00820	n.d.	±	0	n.d.	±	0	-	95.9322	105.287	-0.134243
6.1.1.4	EIE91013.1	Rd_00821	n.d.	±	0	n.d.	±	0	-	16.3262	17.0588	-0.0633345
6.1.1.3	contig-100_1310_+0_max_po1	Rd_00822	n.d.	±	0	n.d.	±	0	-	-	-	-
6.1.1.3	EIE80344.1	Rd_00823	n.d.	±	0	n.d.	±	0	-	36.0194	29.749	0.275934
6.1.1.3	EIE81909.1	Rd_00824	n.d.	±	0	n.d.	±	0	-	139.01	144.243	-0.0533178
6.1.1.2	contig-100_1250_+2_max_po1	Rd_00825	n.d.	±	0	n.d.	±	0	-	-	-	-
6.1.1.2	EIE78701.1	Rd_00826	n.d.	±	0	n.d.	±	0	-	35.248	23.5763	0.580204
6.1.1.2	EIE92453.1	Rd_00827	n.d.	±	0	n.d.	±	0	-	190.441	157.786	0.271372
6.1.1.1	contig-100_545_+0_max_po1	Rd_00828	n.d.	±	0	n.d.	±	0	-	-	-	-
6.1.1.1	EIE76223.1	Rd_00829	n.d.	±	0	n.d.	±	0	-	24.8285	29.568	-0.252043
6.1.1.1	EIE91199.1	Rd_00830	n.d.	±	0	n.d.	±	0	-	263.02	280.313	-0.0918647
3.6.3.1	contig-100_80_-1_max_po1	Rd_00831	n.d.	±	0	n.d.	±	0	-	-	-	-
3.6.3.1	EIE79517.1	Rd_00832	n.d.	±	0	n.d.	±	0	-	29.1984	12.0151	1.28104
3.6.3.1	EIE82835.1	Rd_00833	n.d.	±	0	n.d.	±	0	-	26.1372	16.9159	0.627729
3.6.3.1	EIE85137.1	Rd_00834	n.d.	±	0	n.d.	±	0	-	56.5725	57.2551	-0.0173039
3.6.3.1	EIE89740.1	Rd_00835	n.d.	±	0	n.d.	±	0	-	62.9659	43.0781	0.547616
3.6.3.1	EIE92081.1	Rd_00836	n.d.	±	0	n.d.	±	0	-	61.7733	43.5196	0.505318
3.6.3.6	contig-100_5717_-1_max_po1	Rd_00837	1.46634	±	0.0778663	1.11174	±	0.240293	0.399394	734.117	1796.08	-1.29077
3.6.3.6	contig-100_6002_+1_max_po1	Rd_00838	1.79241	±	0.844154	1.3695	±	0.00749369	0.388256	1820.67	1267.77	0.522182
3.6.3.6	EIE75354.1	Rd_00839	n.d.	±	0	n.d.	±	0	-	4.56663	2.89739	0.656377
3.6.3.6	EIE78929.1	Rd_00840	0.543844	±	0.155366	0.328936	±	0.00289031	0.725384	1302.35	473.672	1.45915
3.6.3.6	EIE83395.1	Rd_00841	0.452826	±	0.023444	0.329481	±	0.0663178	0.458762	435.192	1300.65	-1.57951
3.6.3.6	EIE87190.1	Rd_00842	0.532266	±	0.0323878	0.533157	±	0.103968	-0.00241172	1193.03	945.797	0.335029
3.6.3.4	contig-100_290_-1_max_po1	Rd_00843	n.d.	±	0	n.d.	±	0	-	-	-	-
3.6.3.4	EIE80892.1	Rd_00844	n.d.	±	0	n.d.	±	0	-	8.25993	11.3881	-0.46333
3.6.3.4	EIE81437.1	Rd_00845	n.d.	±	0	n.d.	±	0	-	1.78333	20.7958	-3.54364
3.6.3.4	EIE89269.1	Rd_00846	n.d.	±	0	n.d.	±	0	-	51.9007	65.5565	-0.336985
6.4.1.4	contig-100_4719_-0_max_po1	Rd_00847	0.0159987	±	0.00169102	0	±	0	100	72.8561	30.1286	1.27392
6.4.1.4	EIE91356.1	Rd_00848	0.0172828	±	0.00189351	0	±	0	100	92.0683	32.9735	1.4814
2.7.7.50	contig-100_2656_-0_max_po1	Rd_00849	n.d.	±	0	n.d.	±	0	-	-	-	-
1.13.11.27	contig-100_3981_+2_max_po1	Rd_00850	n.d.	±	0	n.d.	±	0	-	-	-	-
1.13.11.27	EIE81626.1	Rd_00851	n.d.	±	0	n.d.	±	0	-	86.5781	17.675	2.29229
1.13.11.20	EIE80315.1	Rd_00852	n.d.	±	0	n.d.	±	0	-	195.203	101.226	0.947394
4.1.2.48	contig-100_3326_+2_max_po1	Rd_00853	n.d.	±	0	n.d.	±	0	-	-	-	-
4.1.2.48	EIE83938.1	Rd_00854	n.d.	±	0	n.d.	±	0	-	90.1721	11.272	2.99993
4.1.2.48	EIE85050.1	Rd_00855	n.d.	±	0	n.d.	±	0	-	56.855	48.0744	0.242019
4.1.2.48	EIE90469.1	Rd_00856	n.d.	±	0	n.d.	±	0	-	206.725	122.7	0.752579
2.1.1.233	contig-100_6269_-1_max_po1	Rd_00857	n.d.	±	0	n.d.	±	0	-	-	-	-
1.4.4.2	contig-100_52_-0_max_po1	Rd_00858	0.000381876	±	1.09318e-05	0.00468042	±	0.00247921	-3.61546	88.0746	295.584	-1.74677
1.4.4.2	EIE87692.1	Rd_00859	0.00041122	±	8.44454e-05	0.00645747	±	0.00388468	-3.97299	102.218	426.359	-2.06042
3.1.1.5	contig-100_137_+1_max_po1	Rd_00860	n.d.	±	0	n.d.	±	0	-	-	-	-
3.1.1.5	EIE85483.1	Rd_00861	n.d.	±	0	n.d.	±	0	-	26.1372	15.3086	0.771765
3.1.1.3	contig-100_2476_-0_max_po1	Rd_00862	n.d.	±	0	n.d.	±	0	-	-	-	-
3.1.1.3	contig-100_3919_+0_max_po1	Rd_00863	5.23808	±	1.29393	3.12859	±	0.589186	0.743523	1342.77	852.979	0.654627
3.1.1.3	EIE75383.1	Rd_00864	4.54778	±	0.606534	3.17147	±	0.721808	0.52001	1422.69	891.558	0.674218
3.1.1.3	EIE75615.1	Rd_00865	n.d.	±	0	n.d.	±	0	-	109.559	101.597	0.108849
3.1.1.3	EIE86673.1	Rd_00866	n.d.	±	0	n.d.	±	0	-	155.05	23.7981	2.70382
3.2.1.14	contig-100_1159_+0_max_po1	Rd_00867	n.d.	±	0	n.d.	±	0	-	-	-	-
3.2.1.14	EIE86441.1	Rd_00868	n.d.	±	0	n.d.	±	0	-	17.6531	4.62508	1.93237
3.2.1.14	EIE88924.1	Rd_00869	n.d.	±	0	n.d.	±	0	-	70.9917	72.9218	-0.0386987
2.7.11.26	contig-100_621_+1_max_po1	Rd_00870	n.d.	±	0	n.d.	±	0	-	-	-	-
2.7.11.26	EIE83768.1	Rd_00871	n.d.	±	0	n.d.	±	0	-	134.579	73.8383	0.866013
2.7.1.160	contig-100_8356_-1_max_po1	Rd_00872	n.d.	±	0	n.d.	±	0	-	-	-	-
1.3.98.1	contig-100_5690_+2_max_po1	Rd_00873	0.0358799	±	0.00361322	0.0141245	±	0.00176879	1.34498	192.446	115.006	0.742742
1.3.98.1	EIE79352.1	Rd_00874	0.0438846	±	0.00617035	0.0208917	±	0.00255481	1.07078	198.32	117.444	0.755849
5.4.99.12	contig-100_3956_-0_max_po1	Rd_00875	n.d.	±	0	n.d.	±	0	-	-	-	-
5.4.99.12	EIE86681.1	Rd_00876	n.d.	±	0	n.d.	±	0	-	15.1715	8.62417	0.814903
1.18.1.6	contig-100_2687_-0_max_po1	Rd_00877	n.d.	±	0	n.d.	±	0	-	-	-	-
1.18.1.6	EIE75487.1	Rd_00878	n.d.	±	0	n.d.	±	0	-	30.2987	33.4956	-0.144714
2.7.11.25	contig-100_161_-1_max_po1	Rd_00879	n.d.	±	0	n.d.	±	0	-	-	-	-
2.7.11.25	EIE76958.1	Rd_00880	n.d.	±	0	n.d.	±	0	-	19.9854	16.5236	0.274416
2.7.11.25	EIE82947.1	Rd_00881	n.d.	±	0	n.d.	±	0	-	42.4156	26.0983	0.700639
2.7.11.25	EIE88848.1	Rd_00882	n.d.	±	0	n.d.	±	0	-	66.5616	26.7996	1.31248
2.7.11.25	EIE90048.1	Rd_00883	n.d.	±	0	n.d.	±	0	-	25.9845	20.0694	0.372656
3.4.21.92	contig-100_7606_-1_max_po1	Rd_00884	n.d.	±	0	n.d.	±	0	-	-	-	-
1.2.4.4	contig-100_164_-2_max_po1	Rd_00885	n.d.	±	0	n.d.	±	0	-	-	-	-
1.2.4.4	EIE83311.1	Rd_00886	n.d.	±	0	n.d.	±	0	-	16.3496	3.11773	2.39069
1.2.4.4	EIE84947.1	Rd_00887	n.d.	±	0	n.d.	±	0	-	46.5085	27.2001	0.773883
1.2.4.4	EIE87183.1	Rd_00888	n.d.	±	0	n.d.	±	0	-	100.379	7.54285	3.7342
1.2.4.2	contig-100_393_-1_max_po1	Rd_00889	0.0950225	±	0.0105104	0.0431555	±	0.00662658	1.13872	233.127	177.892	0.39011
1.2.4.2	EIE82582.1	Rd_00890	n.d.	±	0	n.d.	±	0	-	35.4705	2.18431	4.02137
1.2.4.2	EIE84056.1	Rd_00891	0.0631117	±	0.00435064	0.0498653	±	0.00302616	0.339872	224.435	170.203	0.399044
1.2.4.2	EIE89358.1	Rd_00892	0.0631117	±	0.00435064	0.00330573	±	0.00069886	4.25486	20.1021	18.3803	0.129189
1.5.1.20	contig-100_1875_-2_max_po1	Rd_00893	n.d.	±	0	n.d.	±	0	-	-	-	-
1.5.1.20	contig-100_1903_+0_max_po1	Rd_00894	0	±	0	0.0100609	±	0.00445812	-100	140.391	203.676	-0.536822
1.5.1.20	EIE78277.1	Rd_00895	0	±	0	0.0136337	±	0.00433395	-100	141.948	203.658	-0.520785
1.5.1.20	EIE87638.1	Rd_00896	n.d.	±	0	n.d.	±	0	-	58.8239	105.724	-0.845826
1.5.1.20	EIE89768.1	Rd_00897	n.d.	±	0	n.d.	±	0	-	24.4541	20.8275	0.231588
6.3.2.1	contig-100_92_-1_max_po1	Rd_00898	0.0121479	±	0.00479467	0.00238391	±	0.00129046	2.34931	90.0194	77.6358	0.213514
6.3.2.6	contig-100_5804_+0_max_po1	Rd_00899	0.0129783	±	0.00138099	0	±	0	100	220.572	140.515	0.650527
6.3.2.6	EIE78644.1	Rd_00900	0.0156683	±	0.0001925	0	±	0	100	232.98	148.001	0.6546
4.2.1.9	contig-100_1752_+2_max_po1	Rd_00901	0.0368461	±	0.00019676	0.087077	±	0.0117706	-1.24078	124.758	347.795	-1.4791
4.2.1.9	EIE77393.1	Rd_00902	0.0505939	±	0.00193063	0.120672	±	0.0150029	-1.25405	127.914	356.674	-1.47943
4.2.1.9	EIE83661.1	Rd_00903	n.d.	±	0	n.d.	±	0	-	9.82718	1.69778	2.53313
4.2.1.59	contig-100_2_-1_max_po1	Rd_00904	0.0532545	±	0.00537616	0.10982	±	0.00839825	-1.04416	110.402	196.888	-0.834611
4.2.1.59	EIE91460.1	Rd_00905	0.084381	±	0.0112705	0.132325	±	0.0124511	-0.649092	43.2619	68.9614	-0.672692
6.3.4.3	contig-100_573_+1_max_po1	Rd_00906	n.d.	±	0	n.d.	±	0	-	-	-	-
6.3.4.3	EIE83367.1	Rd_00907	n.d.	±	0	n.d.	±	0	-	127.267	160.455	-0.334304
6.3.4.3	EIE90374.1	Rd_00908	n.d.	±	0	n.d.	±	0	-	15.0542	8.60699	0.80659
3.2.1.113	contig-100_239_-1_max_po1	Rd_00909	n.d.	±	0	n.d.	±	0	-	-	-	-
3.2.1.113	EIE87209.1	Rd_00910	n.d.	±	0	n.d.	±	0	-	64.6184	36.7028	0.816056
3.2.1.113	EIE92691.1	Rd_00911	n.d.	±	0	n.d.	±	0	-	130.562	111.816	0.223602
3.5.1.41	contig-100_2821_+0_max_po1	Rd_00912	n.d.	±	0	n.d.	±	0	-	-	-	-
3.5.1.41	contig-100_5428_-1_max_po1	Rd_00913	0.817052	±	0.0694031	0.538862	±	0.0242655	0.600514	237.769	156.111	0.606986
3.5.1.41	EIE76704.1	Rd_00914	0.100168	±	0.0163178	0.0672132	±	0.00428362	0.575601	34.1141	2.92294	3.54488
3.5.1.41	EIE76781.1	Rd_00915	1.8039	±	0.32907	0.996207	±	0.0679183	0.856601	225.108	102.866	1.12985
3.5.1.41	EIE76924.1	Rd_00916	1.27822	±	0.15128	0.963042	±	0.21413	0.408466	954.906	702.109	0.443664
3.5.1.41	EIE78451.1	Rd_00917	n.d.	±	0	n.d.	±	0	-	753.635	167.696	2.16802
3.5.1.41	EIE86394.1	Rd_00918	0.0104314	±	0.00200423	0	±	0	100	2679.55	1754.66	0.610798
3.5.1.41	EIE86678.1	Rd_00919	0.0168191	±	0.00755167	0	±	0	100	217.809	152.286	0.516276
3.5.1.41	EIE90980.1	Rd_00920	n.d.	±	0	n.d.	±	0	-	107.153	79.5722	0.429337
2.7.12.1	contig-100_344_-2_max_po1	Rd_00921	n.d.	±	0	n.d.	±	0	-	-	-	-
2.7.12.1	EIE77214.1	Rd_00922	n.d.	±	0	n.d.	±	0	-	39.2963	16.816	1.22456
2.7.12.1	EIE78109.1	Rd_00923	n.d.	±	0	n.d.	±	0	-	232.89	141.078	0.723158
2.7.12.1	EIE84585.1	Rd_00924	n.d.	±	0	n.d.	±	0	-	44.8319	24.5572	0.868378
2.7.12.1	EIE85017.1	Rd_00925	n.d.	±	0	n.d.	±	0	-	9.08007	0.899981	3.33474
2.7.12.2	contig-100_878_+0_max_po1	Rd_00926	n.d.	±	0	n.d.	±	0	-	-	-	-
2.7.12.2	EIE76852.1	Rd_00927	n.d.	±	0	n.d.	±	0	-	80.1436	57.872	0.469723
2.7.12.2	EIE79432.1	Rd_00928	n.d.	±	0	n.d.	±	0	-	158.534	121.073	0.388918
2.7.12.2	EIE80133.1	Rd_00929	n.d.	±	0	n.d.	±	0	-	83.5212	71.6345	0.221488
2.3.1.39	contig-100_2_-1_max_po1	Rd_00930	0.0532545	±	0.00537616	0.10982	±	0.00839825	-1.04416	110.402	196.888	-0.834611
2.3.1.39	EIE89432.1	Rd_00931	n.d.	±	0	n.d.	±	0	-	33.0121	30.0491	0.135672
2.3.1.39	EIE91460.1	Rd_00932	0.084381	±	0.0112705	0.132325	±	0.0124511	-0.649092	43.2619	68.9614	-0.672692
2.3.1.38	contig-100_2_-1_max_po1	Rd_00933	0.0532545	±	0.00537616	0.10982	±	0.00839825	-1.04416	110.402	196.888	-0.834611
2.3.1.38	EIE91460.1	Rd_00934	0.084381	±	0.0112705	0.132325	±	0.0124511	-0.649092	43.2619	68.9614	-0.672692
2.3.1.37	contig-100_2014_-0_max_po1	Rd_00935	n.d.	±	0	n.d.	±	0	-	-	-	-
2.3.1.37	EIE87500.1	Rd_00936	n.d.	±	0	n.d.	±	0	-	546.694	690.173	-0.336225
2.3.1.35	contig-100_345_-2_max_po1	Rd_00937	0.0128954	±	0.00611394	0.00612173	±	0.00132194	1.07485	138.223	342.623	-1.30963
2.3.1.35	EIE79056.1	Rd_00938	0.0179113	±	0.0102131	0.00307633	±	0.000912997	2.54159	310.651	820.117	-1.40053
2.3.1.31	contig-100_2604_-1_max_po1	Rd_00939	n.d.	±	0	n.d.	±	0	-	-	-	-
2.3.1.31	EIE79861.1	Rd_00940	n.d.	±	0	n.d.	±	0	-	142.416	177.951	-0.321365
2.3.1.31	EIE81029.1	Rd_00941	n.d.	±	0	n.d.	±	0	-	102.509	77.9905	0.394379
3.1.3.77	contig-100_6042_+2_max_po1	Rd_00942	0.00571203	±	0.00115741	0.00463972	±	0.000983383	0.299967	93.9027	79.9391	0.232266
3.1.3.77	EIE88523.1	Rd_00943	0.0117232	±	0.00281973	0.00574457	±	0.00121418	1.0291	112.319	92.8698	0.274315
6.1.1.22	contig-100_1967_-2_max_po1	Rd_00944	0.0050055	±	0.00192228	0.00982091	±	0.00129538	-0.972343	343.459	352.945	-0.039305
6.1.1.22	EIE75491.1	Rd_00945	n.d.	±	0	n.d.	±	0	-	26.5945	24.0922	0.142557
6.1.1.22	EIE91746.1	Rd_00946	0.00610359	±	0.00209631	0.0201778	±	0.00452684	-1.72504	362.424	367.976	-0.02193
6.1.1.20	contig-100_2388_+0_max_po1	Rd_00947	n.d.	±	0	n.d.	±	0	-	-	-	-
6.1.1.20	EIE86926.1	Rd_00948	n.d.	±	0	n.d.	±	0	-	158.852	157.65	0.0109581
6.1.1.20	EIE88866.1	Rd_00949	n.d.	±	0	n.d.	±	0	-	120.573	108.834	0.147774
6.1.1.21	contig-100_1499_-1_max_po1	Rd_00950	n.d.	±	0	n.d.	±	0	-	-	-	-
6.1.1.21	EIE77080.1	Rd_00951	n.d.	±	0	n.d.	±	0	-	145.644	124.282	0.228826
6.1.1.21	EIE92436.1	Rd_00952	n.d.	±	0	n.d.	±	0	-	26.8253	19.2306	0.480192
3.1.1.11	contig-100_4781_+2_max_po1	Rd_00953	n.d.	±	0	n.d.	±	0	-	-	-	-
3.1.1.11	EIE81550.1	Rd_00954	n.d.	±	0	n.d.	±	0	-	60.249	43.3673	0.474329
3.1.1.11	EIE85399.1	Rd_00955	n.d.	±	0	n.d.	±	0	-	5.86905	1.05315	2.47842
3.1.1.11	EIE90534.1	Rd_00956	n.d.	±	0	n.d.	±	0	-	34.6986	3.462	3.3252
3.1.1.11	EIE92159.1	Rd_00957	n.d.	±	0	n.d.	±	0	-	7.09804	3.08225	1.20344
2.6.1.9	contig-100_4875_-2_max_po1	Rd_00958	n.d.	±	0	n.d.	±	0	-	-	-	-
2.6.1.9	EIE77745.1	Rd_00959	n.d.	±	0	n.d.	±	0	-	112.965	223.002	-0.981184
3.1.1.31	contig-100_6316_+0_max_po1	Rd_00960	0.00907146	±	0.000607139	0.0158803	±	0.0072163	-0.807832	101.538	76.773	0.40335
3.1.1.31	EIE75650.1	Rd_00961	0.0114776	±	0.000666177	0.0196589	±	0.00892379	-0.77637	117.332	89.0331	0.398182
4.3.2.1	contig-100_3016_-1_max_po1	Rd_00962	0.0858829	±	0.0141999	0.0567365	±	0.0190268	0.598094	287.609	468.389	-0.703597
4.3.2.1	EIE83609.1	Rd_00963	0.121622	±	0.0204779	0.0691167	±	0.0263993	0.815293	301.103	482.384	-0.679924
4.3.2.2	contig-100_5165_+2_max_po1	Rd_00964	0.00464634	±	0.000711815	0.013945	±	8.17531e-07	-1.58558	107.776	67.5268	0.674502
4.3.2.2	EIE78804.1	Rd_00965	0.00628192	±	0.000519026	0.0170672	±	0.000605445	-1.44195	34.8006	31.6118	0.138648
4.3.2.2	EIE85944.1	Rd_00966	0.00628192	±	0.000519026	0.0170672	±	0.000605445	-1.44195	114.87	62.3778	0.880902
1.10.3.11	contig-100_5786_+1_max_po1	Rd_00967	0	±	0	0.00909725	±	0.00270203	-100	233.435	1066.92	-2.19236
1.10.3.11	EIE90831.1	Rd_00968	0	±	0	0.0110337	±	0.00279035	-100	231.663	1065.77	-2.2018
2.2.1.2	contig-100_3718_+1_max_po1	Rd_00969	1.22669	±	0.030334	0.717171	±	0.0488351	0.774379	288.247	226.947	0.344946
2.2.1.2	contig-100_6686_+2_max_po1	Rd_00970	0.00371614	±	0.000143244	0.0153898	±	0.00312129	-2.05009	69.9217	35.201	0.990124
2.2.1.2	EIE78210.1	Rd_00971	0.00454636	±	0.00206452	0.0179382	±	0.00364872	-1.98025	74.8834	35.3017	1.08491
2.2.1.2	EIE86885.1	Rd_00972	1.4174	±	0.0897627	0.922739	±	0.105476	0.619257	315.121	257.962	0.288745
4.2.1.20	contig-100_710_+0_max_po1	Rd_00973	n.d.	±	0	n.d.	±	0	-	-	-	-
4.2.1.20	EIE80396.1	Rd_00974	n.d.	±	0	n.d.	±	0	-	60.7885	35.8911	0.760172
4.2.1.20	EIE86263.1	Rd_00975	n.d.	±	0	n.d.	±	0	-	60.7757	110.133	-0.857684
1.16.3.1	contig-100_553_-2_max_po1	Rd_00976	n.d.	±	0	n.d.	±	0	-	-	-	-
1.16.3.1	EIE84039.1	Rd_00977	0.0192515	±	0.0035326	0	±	0	100	37.9261	29.3374	0.37045
1.16.3.1	EIE89543.1	Rd_00978	0.0192515	±	0.0035326	0	±	0	100	104.45	6.32389	4.04586
2.10.1.1	contig-100_1525_+1_max_po1	Rd_00979	n.d.	±	0	n.d.	±	0	-	-	-	-
2.10.1.1	EIE91014.1	Rd_00980	n.d.	±	0	n.d.	±	0	-	50.8174	43.8168	0.213837
5.3.3.2	contig-100_6973_-2_max_po1	Rd_00981	n.d.	±	0	n.d.	±	0	-	-	-	-
5.3.3.2	EIE82706.1	Rd_00982	n.d.	±	0	n.d.	±	0	-	225.766	197.765	0.191044
5.3.3.2	EIE88881.1	Rd_00983	n.d.	±	0	n.d.	±	0	-	293.438	260.145	0.173741
2.7.4.25	contig-100_3524_+0_max_po1	Rd_00984	n.d.	±	0	n.d.	±	0	-	-	-	-
2.7.4.25	EIE88350.1	Rd_00985	n.d.	±	0	n.d.	±	0	-	41.9426	37.1987	0.173165
2.3.1.20	contig-100_116_+1_max_po1	Rd_00986	n.d.	±	0	n.d.	±	0	-	-	-	-
2.3.1.20	EIE77003.1	Rd_00987	n.d.	±	0	n.d.	±	0	-	172.93	101.165	0.773474
3.5.3.1	EIE77177.1	Rd_00988	0.134004	±	0.0209003	0.0684974	±	0.0101594	0.968157	89.0106	92.8984	-0.0616754
3.5.3.1	EIE82140.1	Rd_00989	0.192679	±	0.0156129	0.11343	±	0.0317487	0.764403	613.098	664.49	-0.11613
3.5.3.4	EIE83089.1	Rd_00990	0.134	±	0.00398711	0.0156953	±	0.00087615	3.09383	554.741	345.996	0.681061
2.6.1.1	contig-100_3417_+1_max_po1	Rd_00991	0.0311273	±	0.00124456	0.0624555	±	0.0103101	-1.00465	166.754	281.787	-0.756878
2.6.1.1	contig-100_3467_-1_max_po1	Rd_00992	0.488483	±	0.0122685	0.26466	±	0.0463538	0.884169	515.89	547.795	-0.0865742
2.6.1.1	EIE83310.1	Rd_00993	0.62151	±	0.00606667	0.313191	±	0.0386359	0.988737	522.605	556.047	-0.0894881
2.6.1.1	EIE84546.1	Rd_00994	0.0516565	±	0.00698891	0.0635654	±	0.0205032	-0.299293	177.893	298.044	-0.744516
2.6.1.2	contig-100_2976_+2_max_po1	Rd_00995	n.d.	±	0	n.d.	±	0	-	-	-	-
2.6.1.2	EIE77573.1	Rd_00996	n.d.	±	0	n.d.	±	0	-	7.94784	15.6338	-0.976033
2.6.1.2	EIE79350.1	Rd_00997	n.d.	±	0	n.d.	±	0	-	157.87	131.15	0.267518
2.6.1.2	EIE85592.1	Rd_00998	n.d.	±	0	n.d.	±	0	-	278.073	165.465	0.74894
2.1.1.33	contig-100_8060_-1_max_po1	Rd_00999	n.d.	±	0	n.d.	±	0	-	-	-	-
2.1.1.33	EIE80418.1	Rd_01000	n.d.	±	0	n.d.	±	0	-	113.775	82.0446	0.4717
2.7.1.29	contig-100_665_-2_max_po1	Rd_01001	n.d.	±	0	n.d.	±	0	-	-	-	-
5.5.1.19	EIE76508.1	Rd_01002	n.d.	±	0	n.d.	±	0	-	12.539	2.07527	2.59505
2.7.1.20	contig-100_4876_-2_max_po1	Rd_01003	0.107605	±	0.00110059	0.0796887	±	0.00315959	0.433298	170.059	133.257	0.35182
2.7.1.20	EIE81436.1	Rd_01004	0.133192	±	0.00754329	0.091356	±	0.0059821	0.543934	173.701	135.749	0.355667
2.7.1.25	contig-100_5611_-2_max_po1	Rd_01005	0.0295038	±	4.5067e-05	0.079297	±	0.0169287	-1.42637	184.589	273.168	-0.565471
2.7.1.25	EIE78331.1	Rd_01006	0.0569386	±	0.00104452	0.116831	±	0.0189333	-1.03694	279.179	411.69	-0.56037
2.7.1.26	contig-100_8742_+2_max_po1	Rd_01007	n.d.	±	0	n.d.	±	0	-	-	-	-
2.7.1.26	EIE89904.1	Rd_01008	n.d.	±	0	n.d.	±	0	-	169.144	140.417	0.268533
1.14.11.27	contig-100_1714_+2_max_po1	Rd_01009	n.d.	±	0	n.d.	±	0	-	-	-	-
1.14.11.27	EIE82251.1	Rd_01010	n.d.	±	0	n.d.	±	0	-	32.2616	24.5972	0.391323
2.1.1.192	contig-100_4517_+1_max_po1	Rd_01011	n.d.	±	0	n.d.	±	0	-	-	-	-
2.1.1.199	contig-100_4109_+1_max_po1	Rd_01012	n.d.	±	0	n.d.	±	0	-	-	-	-
2.1.1.199	EIE76036.1	Rd_01013	n.d.	±	0	n.d.	±	0	-	32.2269	32.9378	-0.0314773
1.8.3.2	contig-100_8940_+0_max_po1	Rd_01014	n.d.	±	0	n.d.	±	0	-	-	-	-
2.4.1.131	contig-100_968_+0_max_po1	Rd_01015	n.d.	±	0	n.d.	±	0	-	-	-	-
2.3.1.199	contig-100_1030_-0_max_po2	Rd_01016	n.d.	±	0	n.d.	±	0	-	-	-	-
2.3.1.199	contig-100_5509_+0_max_po1	Rd_01017	0.0868329	±	0.0061472	0.0365259	±	0.00817887	1.24932	559.761	287.559	0.960954
2.3.1.199	EIE78041.1	Rd_01018	n.d.	±	0	n.d.	±	0	-	34.5033	34.7043	-0.00838049
2.3.1.199	EIE79579.1	Rd_01019	0	±	0	0.0535397	±	0.0091904	-100	588.29	301.055	0.966503
2.3.1.199	EIE80171.1	Rd_01020	n.d.	±	0	n.d.	±	0	-	179.794	99.3711	0.855449
3.1.2.4	contig-100_782_+0_max_po1	Rd_01021	0.0161294	±	0.00591214	0.00531536	±	0.00273449	1.60146	129.05	108.07	0.255962
3.1.2.4	EIE75709.1	Rd_01022	0.0346421	±	0.00256894	0	±	0	100	163.746	176.948	-0.111866
3.1.2.4	EIE81443.1	Rd_01023	n.d.	±	0	n.d.	±	0	-	86.0164	37.9585	1.18019
3.1.2.6	contig-100_30_+0_max_po1	Rd_01024	0	±	0	0.00662424	±	0.00124767	-100	27.1666	36.9642	-0.444293
3.4.24.64	contig-100_3160_+2_max_po1	Rd_01025	n.d.	±	0	n.d.	±	0	-	-	-	-
3.4.24.64	EIE76096.1	Rd_01026	n.d.	±	0	n.d.	±	0	-	379.192	225.234	0.751502
3.4.24.64	EIE77107.1	Rd_01027	n.d.	±	0	n.d.	±	0	-	238.314	129.543	0.879434
3.4.24.64	EIE79631.1	Rd_01028	n.d.	±	0	n.d.	±	0	-	58.2176	51.8689	0.166587
6.1.1.14	contig-100_1429_+0_max_po1	Rd_01029	n.d.	±	0	n.d.	±	0	-	-	-	-
6.1.1.14	EIE86670.1	Rd_01030	n.d.	±	0	n.d.	±	0	-	158.147	122.839	0.364506
6.1.1.14	EIE89491.1	Rd_01031	n.d.	±	0	n.d.	±	0	-	32.3024	23.6447	0.450124
2.7.11.24	contig-100_2992_-0_max_po1	Rd_01032	n.d.	±	0	n.d.	±	0	-	-	-	-
2.7.11.24	contig-100_4552_+2_max_po3	Rd_01033	0.0113215	±	0.00211915	0.00565601	±	0.000738873	1.0012	102.692	62.203	0.723265
2.7.11.24	contig-100_9893_+0_max_po1	Rd_01034	0.0113215	±	0.00211915	0.00565601	±	0.000738873	1.0012	64.7377	57.7737	0.164192
2.7.11.24	EIE76752.1	Rd_01035	n.d.	±	0	n.d.	±	0	-	80.5609	59.9833	0.425519
2.7.11.24	EIE80977.1	Rd_01036	n.d.	±	0	n.d.	±	0	-	19.5895	10.8928	0.84671
2.7.11.24	EIE80988.1	Rd_01037	0.00157861	±	0.000345879	0	±	0	100	123.106	74.6412	0.721862
2.7.11.24	EIE81061.1	Rd_01038	0	±	0	0.00909068	±	0.000277868	-100	90.3583	80.2726	0.17075
2.7.11.24	EIE82699.1	Rd_01039	n.d.	±	0	n.d.	±	0	-	49.0419	37.8642	0.373178
2.7.11.24	EIE84822.1	Rd_01040	0.00438087	±	0.000555704	0.00260417	±	0.000527904	0.750391	206.798	118.422	0.80428
2.7.11.24	EIE88086.1	Rd_01041	0.00438087	±	0.000555704	0.00260417	±	0.000527904	0.750391	11.3787	2.93832	1.95327
2.7.11.24	EIE91628.1	Rd_01042	n.d.	±	0	n.d.	±	0	-	100.532	71.2723	0.496235
2.7.11.24	EIE92263.1	Rd_01043	n.d.	±	0	n.d.	±	0	-	83.147	70.9599	0.228661
3.4.14.5	contig-100_648_-2_max_po1	Rd_01044	n.d.	±	0	n.d.	±	0	-	-	-	-
3.4.14.5	contig-100_676_+2_max_po1	Rd_01045	0.0261174	±	0.0013445	0	±	0	100	172.557	60.568	1.51044
3.4.14.5	EIE76010.1	Rd_01046	0.0389849	±	0.00215854	0	±	0	100	164.392	60.1408	1.45072
2.4.2.14	EIE88357.1	Rd_01047	n.d.	±	0	n.d.	±	0	-	101.875	66.327	0.619133
2.4.2.17	contig-100_2153_-0_max_po1	Rd_01048	0.0192446	±	0.00326668	0.0192904	±	0.00463837	-0.00343185	72.7476	90.0052	-0.30711
2.4.2.17	EIE78730.1	Rd_01049	0.0181713	±	0.00389895	0.015621	±	0.00376546	0.218178	82.0383	112.42	-0.454523
2.4.2.11	contig-100_3776_+0_max_po1	Rd_01050	0.00517979	±	0.0046033	0	±	0	100	51.2973	73.8637	-0.525981
2.4.2.11	EIE77292.1	Rd_01051	0.0103771	±	0.00571173	0	±	0	100	52.1756	74.4445	-0.512792
2.4.2.10	contig-100_6610_-0_max_po1	Rd_01052	n.d.	±	0	n.d.	±	0	-	-	-	-
2.4.2.10	EIE86535.1	Rd_01053	n.d.	±	0	n.d.	±	0	-	116.354	115.338	0.0126546
2.4.2.19	contig-100_6148_-1_max_po1	Rd_01054	0.0361931	±	0.0154125	0.0429901	±	0.00514747	-0.248288	131.939	97.4827	0.436649
2.4.2.19	EIE85068.1	Rd_01055	0.105466	±	0.022665	0.0562048	±	0.00111405	0.908015	99.3333	94.0446	0.0789329
2.4.2.18	contig-100_1403_+2_max_po1	Rd_01056	n.d.	±	0	n.d.	±	0	-	-	-	-
2.4.2.18	EIE84512.1	Rd_01057	n.d.	±	0	n.d.	±	0	-	69.0728	66.1947	0.0614023
2.1.3.3	contig-100_4750_+1_max_po1	Rd_01058	0.0316741	±	0.0138092	0.0222165	±	0.00879366	0.511672	367.599	906.41	-1.30203
2.1.3.3	EIE78090.1	Rd_01059	0.0214527	±	0.0101566	0.0113959	±	0.00193065	0.912645	1.88889	1.31324	0.52441
2.1.3.3	EIE86732.1	Rd_01060	0.0214527	±	0.0101566	0.0113959	±	0.00193065	0.912645	391.387	957.013	-1.28994
2.1.3.2	contig-100_97_-0_max_po1	Rd_01061	0.000221826	±	2.04452e-05	0	±	0	100	103.288	23.4495	2.13905
2.1.3.2	EIE81387.1	Rd_01062	0.00016701	±	1.24259e-06	0	±	0	100	69.0843	16.2644	2.08664
2.1.3.2	EIE90353.1	Rd_01063	n.d.	±	0	n.d.	±	0	-	0.232363	0.408058	-0.81239
5.1.99.6	contig-100_8851_+2_max_po1	Rd_01064	n.d.	±	0	n.d.	±	0	-	-	-	-
2.1.1.1	contig-100_5686_+1_max_po1	Rd_01065	n.d.	±	0	n.d.	±	0	-	-	-	-
2.1.1.1	EIE79838.1	Rd_01066	n.d.	±	0	n.d.	±	0	-	92.5726	137.425	-0.569983
1.5.1.15	contig-100_1941_+1_max_po1	Rd_01067	n.d.	±	0	n.d.	±	0	-	-	-	-
1.5.1.15	EIE86390.1	Rd_01068	n.d.	±	0	n.d.	±	0	-	269.252	220.96	0.285173
3.1.1.29	contig-100_7842_+0_max_po1	Rd_01069	n.d.	±	0	n.d.	±	0	-	-	-	-
3.1.1.29	EIE89464.1	Rd_01070	n.d.	±	0	n.d.	±	0	-	15.5266	6.42993	1.27187
3.5.3.11	contig-100_4024_+2_max_po1	Rd_01071	0.212889	±	0.020111	0.0621424	±	0.0172399	1.77645	378.415	417.086	-0.140373
3.5.3.11	EIE84238.1	Rd_01072	0.246416	±	0.0243691	0.0915185	±	0.0305024	1.42896	415.199	447.497	-0.108074
3.5.3.19	contig-100_3471_-2_max_po1	Rd_01073	n.d.	±	0	n.d.	±	0	-	-	-	-
3.5.3.19	EIE81576.1	Rd_01074	n.d.	±	0	n.d.	±	0	-	105.595	91.1573	0.212106
2.5.1.54	contig-100_4437_+1_max_po1	Rd_01075	n.d.	±	0	n.d.	±	0	-	-	-	-
2.5.1.54	EIE79544.1	Rd_01076	n.d.	±	0	n.d.	±	0	-	98.7266	109.145	-0.144736
2.5.1.54	EIE80490.1	Rd_01077	n.d.	±	0	n.d.	±	0	-	59.6195	306.743	-2.36317
2.5.1.54	EIE82277.1	Rd_01078	n.d.	±	0	n.d.	±	0	-	148.822	179.715	-0.272122
2.5.1.54	EIE86219.1	Rd_01079	n.d.	±	0	n.d.	±	0	-	195.797	332.869	-0.765593
6.1.1.6	contig-100_1059_-1_max_po4	Rd_01080	n.d.	±	0	n.d.	±	0	-	-	-	-
6.1.1.6	contig-100_1963_+2_max_po1	Rd_01081	0.0111146	±	8.56851e-05	0	±	0	100	207.747	181.673	0.193482
6.1.1.6	EIE89289.1	Rd_01082	0.0120321	±	0.00318718	0	±	0	100	200.821	177.552	0.177669
2.7.11.23	contig-100_400_-0_max_po1	Rd_01083	n.d.	±	0	n.d.	±	0	-	-	-	-
2.7.11.23	EIE81290.1	Rd_01084	n.d.	±	0	n.d.	±	0	-	89.2621	109.988	-0.301226
2.7.11.23	EIE87771.1	Rd_01085	n.d.	±	0	n.d.	±	0	-	67.0581	73.2937	-0.128277
2.7.11.23	EIE87775.1	Rd_01086	n.d.	±	0	n.d.	±	0	-	89.2773	58.0434	0.621162
2.7.11.23	EIE89899.1	Rd_01087	n.d.	±	0	n.d.	±	0	-	29.0053	24.3215	0.254089
2.7.11.23	EIE91553.1	Rd_01088	n.d.	±	0	n.d.	±	0	-	105.444	109.094	-0.0490947
1.8.4.12	contig-100_10004_-0_max_po1	Rd_01089	n.d.	±	0	n.d.	±	0	-	-	-	-
1.8.4.12	EIE89988.1	Rd_01090	n.d.	±	0	n.d.	±	0	-	193.669	112.539	0.783172
1.8.4.11	contig-100_8557_+1_max_po1	Rd_01091	n.d.	±	0	n.d.	±	0	-	-	-	-
1.8.4.11	EIE90027.1	Rd_01092	n.d.	±	0	n.d.	±	0	-	70.5804	204.94	-1.53786
2.8.1.6	contig-100_4214_-2_max_po1	Rd_01093	n.d.	±	0	n.d.	±	0	-	-	-	-
2.8.1.6	EIE79238.1	Rd_01094	n.d.	±	0	n.d.	±	0	-	1663.05	896.573	0.891339
2.8.1.7	contig-100_5619_+2_max_po1	Rd_01095	n.d.	±	0	n.d.	±	0	-	-	-	-
2.8.1.7	EIE87017.1	Rd_01096	n.d.	±	0	n.d.	±	0	-	162.978	149.893	0.120739
2.5.1.18	contig-100_4287_-1_max_po1	Rd_01097	n.d.	±	0	n.d.	±	0	-	-	-	-
2.5.1.18	contig-100_7437_+2_max_po1	Rd_01098	0.00573725	±	0.00442784	0.187469	±	0.0335845	-5.03015	1273.6	1079.52	0.238517
2.5.1.18	EIE88978.1	Rd_01099	n.d.	±	0	n.d.	±	0	-	30.6268	13.07	1.22853
2.5.1.10	contig-100_968_-0_max_po1	Rd_01100	n.d.	±	0	n.d.	±	0	-	-	-	-
2.5.1.10	contig-100_4756_-1_max_po1	Rd_01101	0.0757955	±	0.00264657	0.0725352	±	0.005644	0.0634296	301.554	388.125	-0.364105
2.5.1.10	EIE80306.1	Rd_01102	n.d.	±	0	n.d.	±	0	-	159.403	155.795	0.033027
2.5.1.10	EIE89971.1	Rd_01103	0.129952	±	0.00217355	0.0909577	±	0.0168762	0.514716	322.3	404.845	-0.328964
2.5.1.16	contig-100_5955_-0_max_po1	Rd_01104	0.0618421	±	0.00626515	0.0481074	±	0.00173195	0.362333	272.779	139.017	0.972475
2.5.1.16	EIE91908.1	Rd_01105	0.0801256	±	0.00882357	0.0612186	±	0.0089039	0.388292	290.273	145.809	0.99333
2.5.1.15	contig-100_334_-1_max_po1	Rd_01106	n.d.	±	0	n.d.	±	0	-	-	-	-
2.5.1.15	EIE86333.1	Rd_01107	n.d.	±	0	n.d.	±	0	-	36.1526	32.6194	0.148369
4.2.1.22	contig-100_2652_+0_max_po1	Rd_01108	0.00469316	±	0.000822633	0.0089053	±	0.00428471	-0.924104	87.1217	90.1173	-0.0487728
4.2.1.22	EIE84701.1	Rd_01109	0.00455729	±	0.000242162	0.00900492	±	0.00465456	-0.982537	91.9903	92.4087	-0.0065467
3.6.3.8	contig-100_40_+1_max_po1	Rd_01110	n.d.	±	0	n.d.	±	0	-	-	-	-
3.6.3.8	contig-100_378_+0_max_po1	Rd_01111	0.120579	±	0.0316762	0.093208	±	0.0124981	0.371453	969.148	1072.15	-0.145717
3.6.3.8	EIE76557.1	Rd_01112	0.00447554	±	0.000134694	0	±	0	100	12.8069	1.722	2.89477
3.6.3.8	EIE78425.1	Rd_01113	n.d.	±	0	n.d.	±	0	-	591.403	346.127	0.772841
3.6.3.8	EIE79996.1	Rd_01114	n.d.	±	0	n.d.	±	0	-	81.2456	51.9267	0.645813
3.6.3.8	EIE80223.1	Rd_01115	0.132298	±	0.0186913	0.095031	±	0.00765883	0.477318	981.785	1069.15	-0.122988
3.6.3.8	EIE82351.1	Rd_01116	n.d.	±	0	n.d.	±	0	-	105.633	59.8787	0.81894
1.1.1.31	contig-100_5539_+0_max_po1	Rd_01117	n.d.	±	0	n.d.	±	0	-	-	-	-
1.1.1.31	EIE83131.1	Rd_01118	n.d.	±	0	n.d.	±	0	-	19.941	5.80979	1.77918
1.1.1.34	contig-100_382_+0_max_po1	Rd_01119	n.d.	±	0	n.d.	±	0	-	-	-	-
1.1.1.34	EIE79587.1	Rd_01120	n.d.	±	0	n.d.	±	0	-	56.4824	90.2387	-0.675945
1.1.1.34	EIE89473.1	Rd_01121	n.d.	±	0	n.d.	±	0	-	219.674	147.403	0.575601
1.1.1.37	contig-100_1109_-0_max_po1	Rd_01122	0.475423	±	0.0556694	0.103624	±	0.00549089	2.19786	359.856	93.1046	1.9505
1.1.1.37	EIE75494.1	Rd_01123	0.149298	±	0.0587709	0.0164152	±	0.00258131	3.18508	555.935	197.041	1.49642
1.1.1.37	EIE78537.1	Rd_01124	0.815469	±	0.108046	0.129046	±	0.00745366	2.65974	734.156	141.569	2.37458
1.1.1.37	EIE83614.1	Rd_01125	2.42861	±	0.0732234	1.85296	±	0.0908566	0.390299	320.326	238.77	0.423923
5.4.2.2	contig-100_186_-0_max_po1	Rd_01126	0.00322299	±	0.000676925	0.00461729	±	0.00157991	-0.518648	62.2718	63.3958	-0.0258097
5.4.2.2	EIE84308.1	Rd_01127	0.00401274	±	2.04335e-05	0.00236287	±	0.00154539	0.764046	100.921	100.834	0.0012397
5.4.2.2	EIE84411.1	Rd_01128	n.d.	±	0	n.d.	±	0	-	33.6798	32.8899	0.0342385
5.4.2.2	EIE89694.1	Rd_01129	0.00115873	±	0.000346177	0.00132007	±	0.000310623	-0.188072	85.4383	66.3845	0.364037
5.4.2.3	EIE78091.1	Rd_01130	0.0459654	±	0.0032635	0.0174581	±	0.00281207	1.39665	103.286	60.6329	0.768465
5.4.2.1	contig-100_3458_+1_max_po1	Rd_01131	0.30588	±	0.0936057	0.168733	±	0.012862	0.858222	562.326	819.578	-0.543475
5.4.2.1	contig-100_3532_+0_max_po1	Rd_01132	0.213252	±	0.00424042	0.509405	±	0.0311388	-1.25625	806.56	4321.81	-2.42178
5.4.2.1	EIE75759.1	Rd_01133	0.355256	±	0.0984684	0.541192	±	0.0421387	-0.607283	917.686	4591.87	-2.32301
5.4.2.1	EIE81587.1	Rd_01134	0.190848	±	0.0512824	0.158799	±	0.0112348	0.265222	673.878	891.663	-0.404011
3.3.1.1	contig-100_7573_-2_max_po1	Rd_01135	0.471355	±	0.0157395	0.213565	±	0.0498452	1.14214	464.889	431.214	0.108483
3.3.1.1	EIE82479.1	Rd_01136	0.750917	±	0.0323444	0.373398	±	0.0861102	1.00794	302.82	269.593	0.167678
2.3.1.1	contig-100_345_-2_max_po1	Rd_01137	0.0128954	±	0.00611394	0.00612173	±	0.00132194	1.07485	138.223	342.623	-1.30963
2.3.1.1	EIE79056.1	Rd_01138	0.0179113	±	0.0102131	0.00307633	±	0.000912997	2.54159	310.651	820.117	-1.40053
5.4.2.8	contig-100_6453_+1_max_po1	Rd_01139	0.0328885	±	0.00661293	0.0270673	±	0.0118608	0.281032	220.769	227.144	-0.0410728
5.4.2.8	EIE82378.1	Rd_01140	0.0558064	±	0.00583229	0.0593772	±	0.0253819	-0.0894763	248.344	251.911	-0.0205738
2.3.1.4	contig-100_5388_+1_max_po1	Rd_01141	0	±	0	0.0234984	±	0.00473587	-100	458.021	224.263	1.03022
2.3.1.4	EIE77884.1	Rd_01142	n.d.	±	0	n.d.	±	0	-	429.464	252.768	0.764723
2.3.1.4	EIE91644.1	Rd_01143	0.00949114	±	0.00330337	0.0665298	±	0.0233995	-2.80935	836.333	404.478	1.04802
2.3.3.9	contig-100_2149_-0_max_po1	Rd_01144	0.0628902	±	0.0152566	0.00296597	±	0.00130637	4.40626	286.46	213.693	0.422793
2.3.3.9	EIE78798.1	Rd_01145	0.0455663	±	0.0109318	0	±	0	100	7.89171	2.26953	1.79794
2.3.3.9	EIE85941.1	Rd_01146	0.0455663	±	0.0109318	0.00395408	±	0.00173959	3.52655	288.468	214.601	0.426754
2.3.3.8	contig-100_268_-2_max_po1	Rd_01147	0.0178259	±	0.0113688	0.0917494	±	0.0137401	-2.36372	57.9241	256.567	-2.1471
2.3.3.8	EIE89486.1	Rd_01148	0.00940679	±	0.000808536	0.109481	±	0.0163485	-3.54083	57.9589	254.267	-2.13324
2.3.3.1	contig-100_2856_-0_max_po1	Rd_01149	1.11067	±	0.0678121	0.186098	±	0.012651	2.57729	819.41	172.71	2.24623
2.3.3.1	EIE81984.1	Rd_01150	1.35577	±	0.0444869	0.203317	±	0.00807245	2.73731	835.503	175.385	2.25212
1.13.99.1	EIE91805.1	Rd_01151	n.d.	±	0	n.d.	±	0	-	75.2523	21.3869	1.81501
1.1.2.4	contig-100_2110_+1_max_po1	Rd_01152	n.d.	±	0	n.d.	±	0	-	-	-	-
1.1.2.4	EIE80616.1	Rd_01153	n.d.	±	0	n.d.	±	0	-	29.2224	17.1803	0.766323
1.1.2.4	EIE90505.1	Rd_01154	n.d.	±	0	n.d.	±	0	-	119.711	117.407	0.0280295
2.3.3.13	contig-100_1972_-2_max_po1	Rd_01155	n.d.	±	0	n.d.	±	0	-	-	-	-
2.3.3.13	EIE92225.1	Rd_01156	n.d.	±	0	n.d.	±	0	-	182.039	341.52	-0.907727
2.3.3.10	contig-100_3055_-1_max_po1	Rd_01157	0	±	0	0.0197483	±	0.00827296	-100	387.782	539.998	-0.477709
2.3.3.10	EIE88360.1	Rd_01158	0	±	0	0.025014	±	0.0103194	-100	379.418	529.053	-0.479625
2.7.1.39	contig-100_4783_-0_max_po1	Rd_01159	n.d.	±	0	n.d.	±	0	-	-	-	-
2.7.1.39	EIE86332.1	Rd_01160	n.d.	±	0	n.d.	±	0	-	113.182	228.868	-1.01587
2.7.1.33	contig-100_4918_-0_max_po1	Rd_01161	n.d.	±	0	n.d.	±	0	-	-	-	-
2.7.1.33	EIE75572.1	Rd_01162	n.d.	±	0	n.d.	±	0	-	42.4142	33.6677	0.333184
2.7.1.33	EIE83745.1	Rd_01163	n.d.	±	0	n.d.	±	0	-	52.2208	51.2527	0.0269979
2.7.1.30	contig-100_2427_-0_max_po1	Rd_01164	n.d.	±	0	n.d.	±	0	-	-	-	-
2.7.1.30	EIE76144.1	Rd_01165	n.d.	±	0	n.d.	±	0	-	194.6	56.1455	1.79327
2.7.1.30	EIE76407.1	Rd_01166	n.d.	±	0	n.d.	±	0	-	80.4147	49.1728	0.709597
2.7.1.36	contig-100_3759_-0_max_po1	Rd_01167	n.d.	±	0	n.d.	±	0	-	-	-	-
1.5.1.5	contig-100_573_+1_max_po1	Rd_01168	n.d.	±	0	n.d.	±	0	-	-	-	-
1.5.1.5	EIE83367.1	Rd_01169	n.d.	±	0	n.d.	±	0	-	127.267	160.455	-0.334304
1.5.1.5	EIE84336.1	Rd_01170	n.d.	±	0	n.d.	±	0	-	50.769	35.798	0.504068
1.5.1.5	EIE90374.1	Rd_01171	n.d.	±	0	n.d.	±	0	-	15.0542	8.60699	0.80659
2.1.1.182	contig-100_1192_+2_po2	Rd_01172	n.d.	±	0	n.d.	±	0	-	-	-	-
2.1.1.182	EIE85070.1	Rd_01173	n.d.	±	0	n.d.	±	0	-	17.2458	11.0896	0.637042
2.1.1.183	contig-100_6969_+0_max_po1	Rd_01174	n.d.	±	0	n.d.	±	0	-	-	-	-
2.1.1.183	EIE89393.1	Rd_01175	n.d.	±	0	n.d.	±	0	-	59.6893	30.3341	0.976533
6.4.1.2	EIE80272.1	Rd_01176	0.00838663	±	0.00128919	0.0109311	±	0.0014336	-0.382282	49.8777	24.6949	1.01418
6.4.1.3	contig-100_1347_-0_max_po1	Rd_01177	n.d.	±	0	n.d.	±	0	-	-	-	-
6.4.1.3	EIE80679.1	Rd_01178	n.d.	±	0	n.d.	±	0	-	48.0746	35.1259	0.452741
6.4.1.1	contig-100_227_-1_max_po2	Rd_01179	2.14377	±	0.312976	0.395193	±	0.0164723	2.43952	1702.07	738.279	1.20505
6.4.1.1	EIE82226.1	Rd_01180	2.63315	±	0.252624	0.487253	±	0.0431579	2.43405	1663.32	725.806	1.19641
2.3.1.181	contig-100_9825_+2_max_po1	Rd_01181	n.d.	±	0	n.d.	±	0	-	-	-	-
3.4.11.10	contig-100_2487_+2_max_po1	Rd_01182	0	±	0	0.00736575	±	0.00383292	-100	62.225	66.3224	-0.0920024
3.4.11.10	EIE81986.1	Rd_01183	n.d.	±	0	n.d.	±	0	-	63.9974	67.8446	-0.0842209
3.4.11.10	EIE90644.1	Rd_01184	n.d.	±	0	n.d.	±	0	-	45.3144	37.6328	0.267976
2.4.1.132	contig-100_1983_-0_max_po1	Rd_01185	n.d.	±	0	n.d.	±	0	-	-	-	-
4.2.1.93	contig-100_5476_+2_max_po1	Rd_01186	n.d.	±	0	n.d.	±	0	-	-	-	-
4.2.1.93	EIE77719.1	Rd_01187	0.0102964	±	0.00203616	0	±	0	100	80.3575	83.3263	-0.0523391
2.3.1.9	contig-100_3455_+2_max_po1	Rd_01188	0	±	0	0.52014	±	0.0217392	-100	22.843	712.266	-4.96259
2.3.1.9	contig-100_3577_-0_max_po1	Rd_01189	0.074882	±	0.0110987	0.0854177	±	0.018899	-0.189916	163.039	124.714	0.386599
2.3.1.9	EIE76110.1	Rd_01190	n.d.	±	0	n.d.	±	0	-	93.5151	85.344	0.131909
2.3.1.9	EIE89881.1	Rd_01191	0	±	0	0.687441	±	0.0390928	-100	24.6154	773.954	-4.97461
2.3.1.9	EIE90233.1	Rd_01192	0.116631	±	0.0125491	0.125944	±	0.0203529	-0.110841	166.88	128.018	0.382463
2.5.1.7	contig-100_903_+0_max_po1	Rd_01193	n.d.	±	0	n.d.	±	0	-	-	-	-
2.5.1.7	EIE79203.1	Rd_01194	n.d.	±	0	n.d.	±	0	-	34.2981	19.9118	0.784507
2.5.1.6	contig-100_5453_+2_max_po1	Rd_01195	0.0128523	±	0.00231983	0.138318	±	0.019723	-3.42789	572.611	480.631	0.252625
2.5.1.6	EIE79038.1	Rd_01196	0.014886	±	0.00446344	0.0643914	±	0.00988744	-2.11291	329.488	190.305	0.79191
2.5.1.6	EIE87276.1	Rd_01197	0.014886	±	0.00446344	0.162934	±	0.0100163	-3.45226	365.7	355.217	0.0419581
2.5.1.1	contig-100_968_-0_max_po1	Rd_01198	n.d.	±	0	n.d.	±	0	-	-	-	-
2.5.1.1	contig-100_4756_-1_max_po1	Rd_01199	0.0757955	±	0.00264657	0.0725352	±	0.005644	0.0634296	301.554	388.125	-0.364105
2.5.1.1	EIE80306.1	Rd_01200	n.d.	±	0	n.d.	±	0	-	159.403	155.795	0.033027
2.5.1.1	EIE89971.1	Rd_01201	0.129952	±	0.00217355	0.0909577	±	0.0168762	0.514716	322.3	404.845	-0.328964
2.5.1.9	contig-100_7509_+0_max_po1	Rd_01202	0	±	0	0.0123013	±	0.000623583	-100	149.162	140.87	0.0825154
2.5.1.9	EIE88906.1	Rd_01203	0	±	0	0.0189193	±	0.00292437	-100	169.884	160.291	0.0838594
2.1.1.163	contig-100_390_+2_max_po1	Rd_01204	n.d.	±	0	n.d.	±	0	-	-	-	-
2.1.1.163	EIE82663.1	Rd_01205	n.d.	±	0	n.d.	±	0	-	58.4718	51.0147	0.19683
2.1.1.163	EIE88698.1	Rd_01206	n.d.	±	0	n.d.	±	0	-	81.0548	88.1466	-0.121007
3.7.1.2	contig-100_4618_-1_max_po1	Rd_01207	0.0336766	±	0.0027208	0	±	0	100	159.551	38.8998	2.03619
3.7.1.2	EIE84647.1	Rd_01208	0.0492201	±	0.000346445	0	±	0	100	163.358	38.6416	2.07981
1.3.1.38	contig-100_3970_-0_max_po1	Rd_01209	0.0119441	±	0.000488456	0.00827335	±	0.00138612	0.529754	153.938	116.379	0.403516
1.3.1.38	EIE80692.1	Rd_01210	0.0149735	±	0.000339964	0.0308629	±	0.00408053	-1.04347	172.57	128.214	0.428625
1.1.1.49	contig-100_2557_+1_max_po1	Rd_01211	0.03492	±	0.00154296	0.021765	±	0.00136049	0.682045	108.068	133.814	-0.308287
1.1.1.49	contig-100_2824_-1_max_po1	Rd_01212	0.03492	±	0.00154296	0.021765	±	0.00136049	0.682045	56.6226	46.2977	0.290439
1.1.1.49	EIE81093.1	Rd_01213	n.d.	±	0	n.d.	±	0	-	68.2337	64.674	0.0773003
1.1.1.49	EIE85179.1	Rd_01214	0.0477429	±	0.00141014	0.0299607	±	0.00110223	0.672213	114.252	141.759	-0.311218
1.1.1.49	EIE90600.1	Rd_01215	0.0477429	±	0.00141014	0.0299607	±	0.00110223	0.672213	59.2104	45.8609	0.368587
2.7.2.11	contig-100_3908_+1_max_po1	Rd_01216	n.d.	±	0	n.d.	±	0	-	-	-	-
2.7.2.11	EIE80690.1	Rd_01217	n.d.	±	0	n.d.	±	0	-	99.6114	147.297	-0.564343
2.6.1.42	contig-100_4015_-1_max_po1	Rd_01218	0.0631935	±	0.00168321	0.0283402	±	0.0138106	1.15693	528.491	751.85	-0.508566
2.6.1.42	contig-100_4300_+2_max_po1	Rd_01219	0	±	0	0.0523902	±	0.0157387	-100	321.288	591.507	-0.880529
2.6.1.42	EIE80253.1	Rd_01220	0	±	0	0.0705464	±	0.0149896	-100	322.668	586.957	-0.863203
2.6.1.42	EIE82669.1	Rd_01221	0.161956	±	0.0109415	0.0589031	±	0.0197627	1.45919	556.755	782.339	-0.490752
2.6.1.42	EIE88759.1	Rd_01222	0.0234278	±	0.000606655	0.0174421	±	0.00199699	0.425648	25.4863	73.4744	-1.52752
2.6.1.42	EIE91581.1	Rd_01223	n.d.	±	0	n.d.	±	0	-	173.399	161.706	0.100721
2.1.1.100	contig-100_7460_+0_max_po1	Rd_01224	n.d.	±	0	n.d.	±	0	-	-	-	-
3.1.27.1	contig-100_3812_-1_max_po1	Rd_01225	0.0396347	±	0.0168073	0	±	0	100	162.989	71.8004	1.18271
3.1.27.1	contig-100_6940_+2_max_po1	Rd_01226	0.44376	±	0.0934538	0.0165175	±	0.00139136	4.74771	3310.87	274.354	3.5931
3.1.27.1	EIE92480.1	Rd_01227	0.543116	±	0.146307	0.0203056	±	0.00126389	4.74131	3672.6	301.505	3.60655
3.1.27.9	contig-100_5267_-1_max_po1	Rd_01228	n.d.	±	0	n.d.	±	0	-	-	-	-
3.1.21.7	contig-100_7005_-0_max_po1	Rd_01229	n.d.	±	0	n.d.	±	0	-	-	-	-
3.1.21.7	EIE83100.1	Rd_01230	n.d.	±	0	n.d.	±	0	-	58.4158	31.6973	0.881998
2.7.7.9	contig-100_1254_-2_max_po1	Rd_01231	0.0744513	±	0.00348669	0.0266371	±	0.00250546	1.48286	108.308	85.1111	0.347717
2.7.7.9	contig-100_3427_+2_max_po1	Rd_01232	0	±	0	0.0145336	±	0.00175396	-100	39.7981	47.509	-0.2555
2.7.7.9	EIE77268.1	Rd_01233	0	±	0	0.0187162	±	0.00420117	-100	41.2826	48.189	-0.22317
2.7.7.9	EIE79821.1	Rd_01234	0.0925617	±	0.00546285	0.0324615	±	0.00461514	1.51168	137.252	108.773	0.335505
4.1.2.13	contig-100_4375_-2_max_po1	Rd_01235	0.00744897	±	0.000191446	0	±	0	100	298.548	362.541	-0.280177
4.1.2.13	contig-100_5750_+0_max_po1	Rd_01236	1.20308	±	0.200994	2.226	±	0.372942	-0.887721	8975.13	15268.5	-0.766553
4.1.2.13	EIE83371.1	Rd_01237	n.d.	±	0	n.d.	±	0	-	321.267	389.353	-0.277306
4.1.2.13	EIE83821.1	Rd_01238	0.00759039	±	0.000134732	0	±	0	100	2.50975	2.99494	-0.254984
4.1.2.13	EIE87094.1	Rd_01239	0.629576	±	0.0410723	2.19736	±	0.218329	-1.80332	8853.69	15411.1	-0.799622
4.1.2.13	EIE87228.1	Rd_01240	0.629576	±	0.0410723	0.711184	±	0.187039	-0.175841	17.8524	2.88121	2.63137
2.7.7.1	contig-100_1132_-1_max_po1	Rd_01241	0.0311305	±	0.00267732	0.0317284	±	0.00418733	-0.0274434	192.003	139.375	0.46216
2.7.7.1	contig-100_5543_-0_max_po1	Rd_01242	0.0311305	±	0.00267732	0	±	0	100	28.7967	15.4041	0.902587
2.7.7.1	contig-100_6599_+0_max_po1	Rd_01243	0.0107017	±	0.00100151	0	±	0	100	160.262	102.357	0.646821
2.7.7.1	EIE79335.1	Rd_01244	0.0093914	±	0.00637804	0.00492333	±	0.0025736	0.931707	165.38	110.407	0.582946
2.7.7.1	EIE82868.1	Rd_01245	0.078791	±	0.0108618	0.06384	±	0.00838774	0.303569	384.965	264.4	0.542008
2.7.7.7	contig-100_304_+0_max_po1	Rd_01246	n.d.	±	0	n.d.	±	0	-	-	-	-
2.7.7.7	EIE75748.1	Rd_01247	n.d.	±	0	n.d.	±	0	-	14.3818	13.2028	0.123399
2.7.7.7	EIE76071.1	Rd_01248	n.d.	±	0	n.d.	±	0	-	12.3086	10.1166	0.282939
2.7.7.7	EIE76811.1	Rd_01249	n.d.	±	0	n.d.	±	0	-	3.44753	2.49515	0.466436
2.7.7.7	EIE79057.1	Rd_01250	n.d.	±	0	n.d.	±	0	-	25.8022	20.5727	0.326761
2.7.7.7	EIE79556.1	Rd_01251	n.d.	±	0	n.d.	±	0	-	17.5874	12.6603	0.474224
2.7.7.7	EIE84048.1	Rd_01252	n.d.	±	0	n.d.	±	0	-	27.8747	26.2762	0.0852
2.7.7.7	EIE86808.1	Rd_01253	n.d.	±	0	n.d.	±	0	-	82.3312	44.0868	0.901091
2.7.7.7	EIE89514.1	Rd_01254	n.d.	±	0	n.d.	±	0	-	52.9114	46.1649	0.196781
2.7.7.6	contig-100_26_-2_max_po2	Rd_01255	n.d.	±	0	n.d.	±	0	-	-	-	-
2.7.7.6	EIE78533.1	Rd_01256	n.d.	±	0	n.d.	±	0	-	136.763	128.252	0.0926878
2.7.7.6	EIE80451.1	Rd_01257	n.d.	±	0	n.d.	±	0	-	35.1304	19.8919	0.820537
2.7.7.6	EIE82649.1	Rd_01258	n.d.	±	0	n.d.	±	0	-	13.1672	14.4428	-0.133408
2.7.7.6	EIE83325.1	Rd_01259	n.d.	±	0	n.d.	±	0	-	16.1558	10.9847	0.556562
2.7.7.6	EIE83482.1	Rd_01260	n.d.	±	0	n.d.	±	0	-	21.7179	13.7514	0.65931
2.7.7.6	EIE83530.1	Rd_01261	n.d.	±	0	n.d.	±	0	-	204.98	182.929	0.164196
2.7.7.6	EIE84280.1	Rd_01262	n.d.	±	0	n.d.	±	0	-	187.917	133.985	0.488023
2.7.7.6	EIE86232.1	Rd_01263	n.d.	±	0	n.d.	±	0	-	49.1828	32.9713	0.576941
2.7.7.6	EIE87604.1	Rd_01264	n.d.	±	0	n.d.	±	0	-	25.4002	18.7566	0.437441
2.7.7.6	EIE87700.1	Rd_01265	n.d.	±	0	n.d.	±	0	-	39.3936	27.341	0.526898
2.7.7.6	EIE87764.1	Rd_01266	n.d.	±	0	n.d.	±	0	-	25.8422	21.0339	0.297017
2.7.7.6	EIE87928.1	Rd_01267	0	±	0	0.00113045	±	9.43409e-05	-100	84.1746	59.3844	0.503302
2.7.7.6	EIE88521.1	Rd_01268	n.d.	±	0	n.d.	±	0	-	41.9199	34.1645	0.295137
2.7.7.6	EIE89120.1	Rd_01269	n.d.	±	0	n.d.	±	0	-	105.832	124.084	-0.229544
2.7.7.6	EIE89866.1	Rd_01270	n.d.	±	0	n.d.	±	0	-	14.6226	11.7873	0.310965
2.7.7.6	EIE90484.1	Rd_01271	n.d.	±	0	n.d.	±	0	-	15.9044	10.8871	0.546815
2.7.7.6	EIE90595.1	Rd_01272	n.d.	±	0	n.d.	±	0	-	182.113	149.903	0.280802
2.7.7.6	EIE91808.1	Rd_01273	n.d.	±	0	n.d.	±	0	-	19.3627	12.2117	0.665021
5.2.1.8	contig-100_411_+0_max_po1	Rd_01274	n.d.	±	0	n.d.	±	0	-	-	-	-
5.2.1.8	contig-100_1671_-0_max_po1	Rd_01275	0.044694	±	0.00514469	0	±	0	100	165.744	157.492	0.0736819
5.2.1.8	contig-100_2286_+1_max_po1	Rd_01276	0.01932	±	0.00235841	0	±	0	100	75.668	46.2614	0.709875
5.2.1.8	contig-100_4267_-2_max_po1	Rd_01277	0.0571668	±	0.0119838	0.027872	±	0.00603518	1.03636	239.484	209.323	0.1942
5.2.1.8	contig-100_7955_-1_max_po1	Rd_01278	0.0155342	±	0.0107479	0	±	0	100	302.33	234.637	0.365694
5.2.1.8	contig-100_9273_+2_max_po1	Rd_01279	0.0563959	±	0.0220785	0	±	0	100	233.507	231.633	0.0116254
5.2.1.8	contig-100_10482_+0_max_po1	Rd_01280	0.0810896	±	0.0063654	0	±	0	100	1224.39	1061.15	0.206441
5.2.1.8	contig-100_11676_-0_max_po1	Rd_01281	0.558027	±	0.0869828	0.69984	±	0.0492371	-0.32669	1177.43	1232.69	-0.0661694
5.2.1.8	EIE75804.1	Rd_01282	0.0857354	±	0.017232	0.0381548	±	0.0060697	1.16803	235.324	206.254	0.190225
5.2.1.8	EIE75959.1	Rd_01283	n.d.	±	0	n.d.	±	0	-	237.759	164.222	0.533854
5.2.1.8	EIE78617.1	Rd_01284	n.d.	±	0	n.d.	±	0	-	92.0116	92.5865	-0.00898549
5.2.1.8	EIE79531.1	Rd_01285	0.0107494	±	0.00906397	0	±	0	100	47.2689	27.4553	0.783805
5.2.1.8	EIE79808.1	Rd_01286	n.d.	±	0	n.d.	±	0	-	54.9613	35.8921	0.61475
5.2.1.8	EIE81613.1	Rd_01287	n.d.	±	0	n.d.	±	0	-	119.944	92.5707	0.373728
5.2.1.8	EIE81990.1	Rd_01288	n.d.	±	0	n.d.	±	0	-	89.9571	76.5033	0.233715
5.2.1.8	EIE82269.1	Rd_01289	n.d.	±	0	n.d.	±	0	-	51.0231	50.3191	0.0200435
5.2.1.8	EIE85362.1	Rd_01290	0.0789502	±	0.0262961	0.00905195	±	0.000699796	3.12464	306.913	329.643	-0.103072
5.2.1.8	EIE86123.1	Rd_01291	n.d.	±	0	n.d.	±	0	-	101.774	96.2539	0.0804482
5.2.1.8	EIE86964.1	Rd_01292	n.d.	±	0	n.d.	±	0	-	268.87	193.479	0.474728
5.2.1.8	EIE87329.1	Rd_01293	n.d.	±	0	n.d.	±	0	-	479.425	281.728	0.767004
5.2.1.8	EIE88153.1	Rd_01294	0.595892	±	0.107589	0.85983	±	0.051553	-0.529	1286.85	1280.01	0.00768889
5.2.1.8	EIE89933.1	Rd_01295	0.0224893	±	0.00216265	0	±	0	100	141.642	81.9898	0.788735
5.2.1.8	EIE90208.1	Rd_01296	n.d.	±	0	n.d.	±	0	-	74.392	53.615	0.472511
5.2.1.8	EIE91610.1	Rd_01297	0.0205764	±	0.0146332	0	±	0	100	327.533	249.996	0.389739
5.2.1.8	EIE92120.1	Rd_01298	0.0810548	±	0.0128654	0.086097	±	0.042501	-0.0870651	1659.57	1428.86	0.215946
2.5.1.29	contig-100_968_-0_max_po1	Rd_01299	n.d.	±	0	n.d.	±	0	-	-	-	-
2.5.1.29	EIE75736.1	Rd_01300	n.d.	±	0	n.d.	±	0	-	24.3166	1.96873	3.6266
2.5.1.29	EIE80306.1	Rd_01301	n.d.	±	0	n.d.	±	0	-	159.403	155.795	0.033027
2.5.1.21	contig-100_4060_+2_max_po1	Rd_01302	n.d.	±	0	n.d.	±	0	-	-	-	-
2.5.1.21	EIE80439.1	Rd_01303	n.d.	±	0	n.d.	±	0	-	128.035	104.635	0.291176
1.5.5.1	contig-100_2013_+1_max_po1	Rd_01304	n.d.	±	0	n.d.	±	0	-	-	-	-
1.5.5.1	EIE75850.1	Rd_01305	n.d.	±	0	n.d.	±	0	-	74.5014	212.982	-1.51539
1.5.5.1	EIE80316.1	Rd_01306	n.d.	±	0	n.d.	±	0	-	42.1066	4.41823	3.25251
4.2.1.109	contig-100_6437_-1_max_po1	Rd_01307	n.d.	±	0	n.d.	±	0	-	-	-	-
4.2.1.109	EIE80699.1	Rd_01308	n.d.	±	0	n.d.	±	0	-	123.414	95.8512	0.364641
1.8.4.8	EIE78161.1	Rd_01309	n.d.	±	0	n.d.	±	0	-	69.2734	157.808	-1.1878
1.8.4.8	EIE86755.1	Rd_01310	n.d.	±	0	n.d.	±	0	-	94.3333	203.956	-1.11242
4.2.1.104	contig-100_8995_+0_max_po1	Rd_01311	n.d.	±	0	n.d.	±	0	-	-	-	-
1.1.1.23	contig-100_811_-1_max_po1	Rd_01312	0.0248467	±	0.00155587	0.031697	±	0.0041586	-0.351293	50.3359	108.783	-1.11179
1.1.1.23	EIE79437.1	Rd_01313	0.0400316	±	0.00500706	0.0406751	±	0.00417117	-0.0230073	51.1167	108.851	-1.09049
1.1.1.22	contig-100_3231_+0_max_po1	Rd_01314	0.108403	±	0.00214854	0.20102	±	0.029402	-0.890927	435.677	439.301	-0.0119518
1.1.1.22	EIE82514.1	Rd_01315	0.18466	±	0.0280133	0.314878	±	0.0301041	-0.769923	168.226	148.605	0.17892
1.1.1.27	contig-100_5957_-1_max_po1	Rd_01316	n.d.	±	0	n.d.	±	0	-	-	-	-
1.1.1.27	EIE81483.1	Rd_01317	n.d.	±	0	n.d.	±	0	-	18.1683	13.5183	0.426509
1.1.1.25	contig-100_49_-1_max_po1	Rd_01318	0.00220106	±	0.000491599	0.00584768	±	0.0031268	-1.40967	38.8157	67.893	-0.806622
1.1.1.25	EIE85491.1	Rd_01319	0.00312603	±	0.000962128	0.00772556	±	0.00339004	-1.30531	39.4182	67.0823	-0.767072
3.5.4.9	contig-100_573_+1_max_po1	Rd_01320	n.d.	±	0	n.d.	±	0	-	-	-	-
3.5.4.9	EIE83367.1	Rd_01321	n.d.	±	0	n.d.	±	0	-	127.267	160.455	-0.334304
3.5.4.9	EIE84336.1	Rd_01322	n.d.	±	0	n.d.	±	0	-	50.769	35.798	0.504068
3.5.4.9	EIE90374.1	Rd_01323	n.d.	±	0	n.d.	±	0	-	15.0542	8.60699	0.80659
3.5.4.6	contig-100_830_+2_max_po1	Rd_01324	n.d.	±	0	n.d.	±	0	-	-	-	-
3.5.4.6	EIE83880.1	Rd_01325	n.d.	±	0	n.d.	±	0	-	45.4133	29.6414	0.6155
3.5.4.6	EIE87159.1	Rd_01326	n.d.	±	0	n.d.	±	0	-	82.6022	97.7679	-0.243181
3.5.4.5	contig-100_3993_+0_max_po1	Rd_01327	0.0224963	±	0.00530417	0	±	0	100	196.274	92.5615	1.08439
3.5.4.5	EIE77000.1	Rd_01328	0.0433354	±	0.00485915	0	±	0	100	396.456	173.217	1.19458
6.1.1.15	contig-100_1083_+1_max_po1	Rd_01329	0.00329457	±	0.000442684	0	±	0	100	161.78	136.43	0.245876
6.1.1.15	EIE84027.1	Rd_01330	0.00628041	±	0.00224819	0	±	0	100	168.075	139.581	0.268009
6.1.1.15	EIE91318.1	Rd_01331	n.d.	±	0	n.d.	±	0	-	48.9099	38.9224	0.329527
1.14.19.1	contig-100_3008_-1_max_po1	Rd_01332	n.d.	±	0	n.d.	±	0	-	-	-	-
1.14.19.1	EIE76084.1	Rd_01333	n.d.	±	0	n.d.	±	0	-	124.847	64.3426	0.956312
1.14.19.1	EIE84760.1	Rd_01334	n.d.	±	0	n.d.	±	0	-	420.816	253.112	0.733414
2.7.1.35	contig-100_5161_-1_max_po1	Rd_01335	0.0067141	±	0.000828032	0	±	0	100	149.469	102.268	0.547491
3.4.25.1	contig-100_2426_-0_max_po1	Rd_01336	0.014816	±	0.00172789	0.0135407	±	0.00088128	0.129851	198.648	177.272	0.164254
3.4.25.1	contig-100_2849_+1_max_po1	Rd_01337	0	±	0	0.0383544	±	0.00593385	-100	176.248	140.627	0.325736
3.4.25.1	contig-100_4766_-2_max_po2	Rd_01338	0.00727052	±	0.00131301	0	±	0	100	131.766	88.4746	0.574641
3.4.25.1	contig-100_5118_+1_max_po1	Rd_01339	0.0558766	±	0.007982	0	±	0	100	298.964	212.756	0.490773
3.4.25.1	contig-100_5794_-0_max_po1	Rd_01340	0.00410809	±	4.37724e-05	0.051492	±	0.00056019	-3.64781	163.831	134.493	0.284674
3.4.25.1	contig-100_6170_-2_max_po1	Rd_01341	0.246927	±	0.0359019	0.118154	±	0.0136033	1.06342	262.201	176.017	0.574959
3.4.25.1	contig-100_7108_-2_max_po1	Rd_01342	0.134008	±	0.0165707	0.11788	±	0.0238587	0.184998	434.924	292.128	0.574161
3.4.25.1	contig-100_7267_-0_max_po1	Rd_01343	0.0810802	±	0.0109396	0.0306317	±	0.00765154	1.40433	183.033	159.366	0.199764
3.4.25.1	contig-100_7352_+2_max_po1	Rd_01344	0.014816	±	0.00172789	0.0135407	±	0.00088128	0.129851	141.57	125.938	0.168798
3.4.25.1	contig-100_7569_-1_max_po1	Rd_01345	0.00662327	±	0.000918196	0.0318013	±	0.00968744	-2.26347	114.796	92.7674	0.307386
3.4.25.1	contig-100_7742_+0_max_po1	Rd_01346	0.0440508	±	0.0147151	0	±	0	100	245.883	175.399	0.487329
3.4.25.1	contig-100_8041_+1_max_po1	Rd_01347	0.174101	±	0.0180673	0.104264	±	0.0303236	0.739684	304.753	221.988	0.457158
3.4.25.1	contig-100_8616_-1_max_po1	Rd_01348	0.108021	±	0.009425	0.0279502	±	0.00197404	1.95038	251.649	155.831	0.691429
3.4.25.1	contig-100_8785_-0_max_po1	Rd_01349	0	±	0	0.00912326	±	0.00152565	-100	227.862	188.026	0.277231
3.4.25.1	contig-100_10049_+1_max_po1	Rd_01350	0.108021	±	0.009425	0.0279502	±	0.00197404	1.95038	154.816	119.105	0.378323
3.4.25.1	contig-100_10300_-1_max_po1	Rd_01351	0	±	0	0.0383544	±	0.00593385	-100	150.855	97.6285	0.627792
3.4.25.1	EIE75304.1	Rd_01352	0.0778916	±	0.0102833	0	±	0	100	372.312	266.213	0.483934
3.4.25.1	EIE75806.1	Rd_01353	0.162178	±	0.0215055	0.146554	±	0.0233139	0.146146	440.083	295.364	0.575284
3.4.25.1	EIE75821.1	Rd_01354	0.0912519	±	0.0314307	0.059574	±	0.0267742	0.615172	255.599	182.374	0.486982
3.4.25.1	EIE75917.1	Rd_01355	0.0633076	±	0.00461019	0.0148853	±	4.82971e-05	2.08849	315.397	230.347	0.453358
3.4.25.1	EIE76738.1	Rd_01356	0.0257333	±	0.00107661	0.00312107	±	0.000228862	3.04352	305.462	282.137	0.1146
3.4.25.1	EIE77321.1	Rd_01357	0.0633076	±	0.00461019	0.0148853	±	4.82971e-05	2.08849	258.022	227.804	0.179705
3.4.25.1	EIE77490.1	Rd_01358	0.0700955	±	0.00243939	0.0336398	±	0.00367615	1.05915	207.77	146.543	0.503664
3.4.25.1	EIE77659.1	Rd_01359	0.125865	±	0.00539208	0.050975	±	0.00773677	1.30402	139.203	113.236	0.297859
3.4.25.1	EIE77858.1	Rd_01360	0.0541164	±	0.00273769	0.0256852	±	0.00431197	1.07513	228.039	185.127	0.300761
3.4.25.1	EIE77859.1	Rd_01361	0.043673	±	0.0108183	0.0524924	±	0.0035496	-0.265368	359.38	288.724	0.315821
3.4.25.1	EIE80524.1	Rd_01362	0.107367	±	0.0011438	0.0160139	±	3.68799e-05	2.74515	296.192	242.994	0.285615
3.4.25.1	EIE81067.1	Rd_01363	0.142436	±	0.0241082	0.0913816	±	0.0128945	0.64034	188.328	199.657	-0.0842758
3.4.25.1	EIE81145.1	Rd_01364	0.0143279	±	0.00801984	0.00759388	±	0.0010137	0.915915	240.287	175.132	0.456318
3.4.25.1	EIE82304.1	Rd_01365	0.0452332	±	0.00877854	0	±	0	100	155.611	112.289	0.470733
3.4.25.1	EIE83838.1	Rd_01366	0.0049776	±	0.000185484	0.0714	±	0.00690468	-3.8424	209.395	171.271	0.28995
3.4.25.1	EIE85700.1	Rd_01367	0.323987	±	0.0479819	0.141241	±	0.0158864	1.19778	306.787	200.2	0.615796
3.4.25.1	EIE87129.1	Rd_01368	0.113695	±	0.0056937	0.0578239	±	0.00875856	0.975431	169.837	150.7	0.172467
3.4.25.1	EIE87710.1	Rd_01369	0.043673	±	0.0108183	0.0524924	±	0.0035496	-0.265368	144.363	95.5363	0.595585
3.4.25.1	EIE87711.1	Rd_01370	0.0541164	±	0.00273769	0.0256852	±	0.00431197	1.07513	225.474	156.452	0.527241
3.4.25.1	EIE88171.1	Rd_01371	0.00802624	±	0.000559804	0.0385674	±	0.0138477	-2.26458	119.186	93.1174	0.356093
3.4.25.1	EIE89235.1	Rd_01372	0.125865	±	0.00539208	0.050975	±	0.00773677	1.30402	186.762	120.565	0.631387
3.4.25.1	EIE91509.1	Rd_01373	n.d.	±	0	n.d.	±	0	-	66.5041	57.2215	0.216884
3.4.25.1	EIE91623.1	Rd_01374	0.0257333	±	0.00107661	0.0300773	±	0.00210373	-0.225041	146.015	126.674	0.204997
3.4.25.1	EIE92221.1	Rd_01375	0.142436	±	0.0241082	0.0913816	±	0.0128945	0.64034	472	382.169	0.304575
3.4.25.1	EIE92282.1	Rd_01376	0.0143279	±	0.00801984	0	±	0	100	207.426	139.656	0.570715
3.4.25.1	EIE92303.1	Rd_01377	0.0700955	±	0.00243939	0.0336398	±	0.00367615	1.05915	281.618	185.629	0.601318
3.6.1.1	contig-100_5695_+0_max_po1	Rd_01378	n.d.	±	0	n.d.	±	0	-	-	-	-
3.6.1.1	contig-100_5752_-0_max_po1	Rd_01379	1.54174	±	0.135763	1.41149	±	0.131127	0.12734	1058.99	944.594	0.164924
3.6.1.1	EIE78797.1	Rd_01380	1.95439	±	0.191564	1.6859	±	0.103819	0.213203	1135.2	1013.05	0.164245
3.6.1.1	EIE86361.1	Rd_01381	n.d.	±	0	n.d.	±	0	-	82.6908	56.0269	0.561606
6.1.1.18	contig-100_929_+1_max_po1	Rd_01382	n.d.	±	0	n.d.	±	0	-	-	-	-
6.1.1.18	EIE86796.1	Rd_01383	n.d.	±	0	n.d.	±	0	-	224.504	253.582	-0.175714
4.4.1.8	contig-100_4384_+0_max_po1	Rd_01384	n.d.	±	0	n.d.	±	0	-	-	-	-
4.4.1.8	EIE80203.1	Rd_01385	n.d.	±	0	n.d.	±	0	-	266.532	219.217	0.281945
2.8.1.11	contig-100_1183_+0_max_po1	Rd_01386	n.d.	±	0	n.d.	±	0	-	-	-	-
1.3.1.9	contig-100_2_-1_max_po1	Rd_01387	0.0532545	±	0.00537616	0.10982	±	0.00839825	-1.04416	110.402	196.888	-0.834611
1.3.1.9	EIE91460.1	Rd_01388	0.084381	±	0.0112705	0.132325	±	0.0124511	-0.649092	43.2619	68.9614	-0.672692
6.2.1.5	EIE77590.1	Rd_01389	n.d.	±	0	n.d.	±	0	-	240.383	68.1092	1.81941
6.2.1.5	EIE85313.1	Rd_01390	0.0614878	±	0.00322213	0.0424398	±	0.00376227	0.534883	248.026	84.0964	1.56037
6.2.1.5	EIE88371.1	Rd_01391	n.d.	±	0	n.d.	±	0	-	174.553	53.8101	1.69772
6.2.1.5	EIE89622.1	Rd_01392	n.d.	±	0	n.d.	±	0	-	82.2756	38.3788	1.10016
6.2.1.3	contig-100_252_-2_max_po1	Rd_01393	n.d.	±	0	n.d.	±	0	-	-	-	-
6.2.1.3	contig-100_1460_-1_max_po1	Rd_01394	0.0913497	±	0.0192649	0.0748916	±	0.0132105	0.286595	355.757	321.811	0.144677
6.2.1.3	contig-100_1786_-0_max_po1	Rd_01395	0.0913497	±	0.0192649	0.0748916	±	0.0132105	0.286595	41.4124	17.8147	1.21699
6.2.1.3	EIE77621.1	Rd_01396	n.d.	±	0	n.d.	±	0	-	194.306	79.5301	1.28876
6.2.1.3	EIE80663.1	Rd_01397	n.d.	±	0	n.d.	±	0	-	106.032	92.8847	0.190992
6.2.1.3	EIE80757.1	Rd_01398	n.d.	±	0	n.d.	±	0	-	63.6888	35.8769	0.827987
6.2.1.3	EIE85733.1	Rd_01399	0.120099	±	0.0214158	0.101306	±	0.00748481	0.245501	366.452	326.632	0.165958
6.2.1.3	EIE87083.1	Rd_01400	0.019427	±	0.010485	0	±	0	100	254.599	138.845	0.874758
6.2.1.3	EIE87990.1	Rd_01401	0.120099	±	0.0214158	0.101306	±	0.00748481	0.245501	41.9045	18.7219	1.16238
6.2.1.3	EIE89627.1	Rd_01402	n.d.	±	0	n.d.	±	0	-	18.9591	1.62922	3.54064
6.2.1.3	EIE91269.1	Rd_01403	0.0135201	±	0.00346451	0.0116519	±	0.00473319	0.214542	72.9821	62.218	0.23021
3.1.26.11	contig-100_892_-0_max_po1	Rd_01404	n.d.	±	0	n.d.	±	0	-	-	-	-
3.1.26.11	EIE90302.1	Rd_01405	n.d.	±	0	n.d.	±	0	-	26.1259	16.4226	0.669797
3.1.3.48	contig-100_1035_-1_max_po1	Rd_01406	n.d.	±	0	n.d.	±	0	-	-	-	-
3.1.3.48	EIE75409.1	Rd_01407	n.d.	±	0	n.d.	±	0	-	140.048	89.6427	0.643659
3.1.3.48	EIE75798.1	Rd_01408	n.d.	±	0	n.d.	±	0	-	9.49351	2.41821	1.973
3.1.3.48	EIE75802.1	Rd_01409	n.d.	±	0	n.d.	±	0	-	105.509	95.784	0.139511
3.1.3.48	EIE76149.1	Rd_01410	n.d.	±	0	n.d.	±	0	-	45.6792	32.1469	0.506856
3.1.3.48	EIE76741.1	Rd_01411	n.d.	±	0	n.d.	±	0	-	169.49	260.413	-0.619598
3.1.3.48	EIE79468.1	Rd_01412	n.d.	±	0	n.d.	±	0	-	136.811	61.6828	1.14924
3.1.3.48	EIE79753.1	Rd_01413	n.d.	±	0	n.d.	±	0	-	33.8047	17.4502	0.953984
3.1.3.48	EIE80746.1	Rd_01414	n.d.	±	0	n.d.	±	0	-	204.495	283.377	-0.470654
3.1.3.48	EIE81798.1	Rd_01415	n.d.	±	0	n.d.	±	0	-	34.2674	27.9863	0.292116
3.1.3.48	EIE86444.1	Rd_01416	n.d.	±	0	n.d.	±	0	-	43.5956	36.6107	0.251916
3.1.3.48	EIE90392.1	Rd_01417	n.d.	±	0	n.d.	±	0	-	48.1434	44.6593	0.108378
3.1.3.48	EIE91624.1	Rd_01418	n.d.	±	0	n.d.	±	0	-	52.0344	55.1062	-0.0827503
3.1.3.48	EIE92455.1	Rd_01419	n.d.	±	0	n.d.	±	0	-	116.289	110.456	0.0742427
3.1.3.46	contig-100_3058_+1_max_po1	Rd_01420	n.d.	±	0	n.d.	±	0	-	-	-	-
3.1.3.46	EIE83097.1	Rd_01421	n.d.	±	0	n.d.	±	0	-	116.508	76.0949	0.614557
3.1.3.46	EIE83207.1	Rd_01422	n.d.	±	0	n.d.	±	0	-	20.9742	54.3358	-1.37329
3.1.3.46	EIE90047.1	Rd_01423	n.d.	±	0	n.d.	±	0	-	61.684	25.4757	1.27578
3.1.3.46	EIE91215.1	Rd_01424	n.d.	±	0	n.d.	±	0	-	75.3072	115.52	-0.61728
3.2.1.4	contig-100_1781_-0_max_po1	Rd_01425	n.d.	±	0	n.d.	±	0	-	-	-	-
3.2.1.4	contig-100_1909_+1_max_po1	Rd_01426	0.674804	±	0.0275803	0.739287	±	0.250194	-0.131665	242.139	389.687	-0.686478
3.2.1.4	EIE75679.1	Rd_01427	n.d.	±	0	n.d.	±	0	-	13.0498	1.29887	3.3287
3.2.1.4	EIE78620.1	Rd_01428	n.d.	±	0	n.d.	±	0	-	66.3906	31.1927	1.08977
3.2.1.4	EIE80234.1	Rd_01429	0	±	0	0.0148725	±	0.0076328	-100	876.788	443.298	0.98395
3.2.1.4	EIE86317.1	Rd_01430	n.d.	±	0	n.d.	±	0	-	193.93	49.3723	1.97376
3.2.1.3	contig-100_2815_+0_max_po1	Rd_01431	4.90411	±	0.394968	2.96971	±	0.470099	0.72367	2071.61	514.435	2.00969
3.2.1.3	EIE75378.1	Rd_01432	5.03847	±	0.277195	3.67023	±	0.473715	0.457116	1998.14	494.561	2.01444
3.2.1.3	EIE75423.1	Rd_01433	n.d.	±	0	n.d.	±	0	-	11.8609	7.27757	0.704687
3.2.1.3	EIE81396.1	Rd_01434	n.d.	±	0	n.d.	±	0	-	110.477	11.4691	3.26791
4.99.1.1	contig-100_3556_-1_max_po1	Rd_01435	n.d.	±	0	n.d.	±	0	-	-	-	-
4.99.1.1	EIE81132.1	Rd_01436	n.d.	±	0	n.d.	±	0	-	89.3765	99.3177	-0.152156
1.1.1.169	contig-100_5278_+2_max_po1	Rd_01437	n.d.	±	0	n.d.	±	0	-	-	-	-
1.1.1.169	EIE88347.1	Rd_01438	n.d.	±	0	n.d.	±	0	-	235.517	170.03	0.470046
2.5.1.32	EIE75730.1	Rd_01439	n.d.	±	0	n.d.	±	0	-	1.21404	5.04002	-2.05362
2.5.1.32	EIE76508.1	Rd_01440	n.d.	±	0	n.d.	±	0	-	12.539	2.07527	2.59505
2.5.1.39	contig-100_4039_+1_max_po1	Rd_01441	n.d.	±	0	n.d.	±	0	-	-	-	-
2.5.1.39	EIE81617.1	Rd_01442	n.d.	±	0	n.d.	±	0	-	67.7339	57.7791	0.229331
3.2.1.52	EIE80852.1	Rd_01443	n.d.	±	0	n.d.	±	0	-	8.72351	10.2711	-0.235607
3.2.1.52	EIE81502.1	Rd_01444	n.d.	±	0	n.d.	±	0	-	14.0208	1.50681	3.218
3.2.1.58	EIE76115.1	Rd_01445	n.d.	±	0	n.d.	±	0	-	3.1875	2.05358	0.634284
4.2.1.119	contig-100_1818_+1_max_po1	Rd_01446	n.d.	±	0	n.d.	±	0	-	-	-	-
4.2.1.119	EIE83825.1	Rd_01447	n.d.	±	0	n.d.	±	0	-	14.7758	1.16273	3.66765
1.1.1.14	contig-100_4470_+1_max_po1	Rd_01448	n.d.	±	0	n.d.	±	0	-	-	-	-
4.2.3.4	contig-100_49_-1_max_po1	Rd_01449	0.00220106	±	0.000491599	0.00584768	±	0.0031268	-1.40967	38.8157	67.893	-0.806622
4.2.3.4	EIE85491.1	Rd_01450	0.00312603	±	0.000962128	0.00772556	±	0.00339004	-1.30531	39.4182	67.0823	-0.767072
4.2.3.5	contig-100_4601_-0_max_po1	Rd_01451	0	±	0	0.00428929	±	0.00314402	-100	68.1003	191.568	-1.49212
4.2.3.5	EIE90751.1	Rd_01452	0	±	0	0.0049233	±	0.00326296	-100	71.0635	201.528	-1.5038
4.2.3.1	contig-100_516_-0_max_po1	Rd_01453	0.0747248	±	0.00675934	0.135507	±	0.0179768	-0.858713	145.209	376.821	-1.37574
4.2.3.1	EIE89708.1	Rd_01454	0.0918205	±	0.00808331	0.159488	±	0.00650694	-0.796557	168.02	609.3	-1.85852
2.7.7.41	contig-100_823_-2_max_po1	Rd_01455	n.d.	±	0	n.d.	±	0	-	-	-	-
2.7.7.41	EIE76044.1	Rd_01456	n.d.	±	0	n.d.	±	0	-	38.4514	32.0289	0.263662
2.7.7.41	EIE78274.1	Rd_01457	n.d.	±	0	n.d.	±	0	-	4.38365	4.0197	0.125044
2.7.7.41	EIE79651.1	Rd_01458	n.d.	±	0	n.d.	±	0	-	51.7188	14.74	1.81095
2.7.7.41	EIE84627.1	Rd_01459	n.d.	±	0	n.d.	±	0	-	132.369	46.9737	1.49464
3.4.21.53	contig-100_332_+0_max_po1	Rd_01460	n.d.	±	0	n.d.	±	0	-	-	-	-
3.4.21.53	EIE79716.1	Rd_01461	n.d.	±	0	n.d.	±	0	-	52.272	38.6388	0.435988
3.4.21.53	EIE84557.1	Rd_01462	n.d.	±	0	n.d.	±	0	-	13.4775	7.39345	0.866229
3.4.21.53	EIE87184.1	Rd_01463	n.d.	±	0	n.d.	±	0	-	50.8208	68.7253	-0.435422
2.7.1.11	contig-100_536_-0_max_po1	Rd_01464	0	±	0	0.00627632	±	0.00247231	-100	178.105	400.903	-1.17053
2.7.1.11	contig-100_615_+1_max_po1	Rd_01465	0.0264284	±	0.000436081	0.0866602	±	0.0188024	-1.71328	329.493	636.705	-0.950376
2.7.1.11	EIE87494.1	Rd_01466	0	±	0	0.010511	±	0.00166048	-100	181.214	401.12	-1.14634
2.7.1.11	EIE88095.1	Rd_01467	0.0331698	±	0.000373156	0.103858	±	0.0167109	-1.64667	340.249	646.262	-0.92553
3.1.26.4	contig-100_6159_-0_max_po1	Rd_01468	n.d.	±	0	n.d.	±	0	-	-	-	-
3.1.26.4	EIE75920.1	Rd_01469	n.d.	±	0	n.d.	±	0	-	15.3646	15.3815	-0.00158072
3.1.26.4	EIE79556.1	Rd_01470	n.d.	±	0	n.d.	±	0	-	17.5874	12.6603	0.474224
3.1.26.4	EIE80493.1	Rd_01471	n.d.	±	0	n.d.	±	0	-	40.8955	25.8258	0.663131
3.1.26.5	contig-100_1099_-2_max_po1	Rd_01472	n.d.	±	0	n.d.	±	0	-	-	-	-
3.1.26.5	EIE88645.1	Rd_01473	n.d.	±	0	n.d.	±	0	-	26.6256	23.6617	0.170259
2.5.1.61	contig-100_5203_+1_max_po1	Rd_01474	0.0051421	±	0.00280571	0.0157632	±	0.00319602	-1.61613	197.829	167.791	0.237585
2.5.1.61	EIE84619.1	Rd_01475	0.0061955	±	0.00329552	0.0167627	±	0.00546524	-1.43596	200.901	167.43	0.26292
2.4.1.83	contig-100_6778_-1_max_po1	Rd_01476	n.d.	±	0	n.d.	±	0	-	-	-	-
2.4.1.83	EIE80295.1	Rd_01477	n.d.	±	0	n.d.	±	0	-	222.099	172.057	0.368318
1.8.1.4	contig-100_2862_+1_max_po1	Rd_01478	0.197235	±	0.0203674	0.187486	±	0.0124183	0.0731369	273.096	162.296	0.750775
1.8.1.4	EIE85761.1	Rd_01479	0.0358887	±	0.0143918	0.0598006	±	0.0120509	-0.736632	188.218	132.508	0.506329
1.8.1.4	EIE91299.1	Rd_01480	0.541079	±	0.0549759	0.46609	±	0.00165881	0.215231	252.011	144.277	0.804646
1.8.1.7	EIE75318.1	Rd_01481	n.d.	±	0	n.d.	±	0	-	n.d.	n.d.	-
1.8.1.7	EIE86048.1	Rd_01482	0.00497682	±	0.00107507	0.00572012	±	0.000203989	-0.200819	14.4435	7.96162	0.859285
1.8.1.2	contig-100_54_+1_max_po1	Rd_01483	n.d.	±	0	n.d.	±	0	-	-	-	-
1.8.1.2	EIE77198.1	Rd_01484	n.d.	±	0	n.d.	±	0	-	25.2225	46.2102	-0.873501
1.8.1.2	EIE77682.1	Rd_01485	n.d.	±	0	n.d.	±	0	-	79.4321	112.059	-0.496469
1.8.1.9	contig-100_4471_+0_max_po1	Rd_01486	0.152442	±	0.0244216	0.269045	±	0.0526042	-0.81959	361.887	346.994	0.0606253
1.8.1.9	EIE81901.1	Rd_01487	0.215808	±	0.0367224	0.306599	±	0.0586816	-0.506604	408.478	387.736	0.0751847
2.4.2.7	contig-100_8279_+0_max_po1	Rd_01488	0.117322	±	0.0103804	0.116673	±	0.00392262	0.00799416	371.459	301.652	0.300321
2.4.2.7	EIE77793.1	Rd_01489	0.109334	±	0.00529274	0.143411	±	0.00446	-0.391407	437.486	356.811	0.294076
6.5.1.2	contig-100_765_-0_max_po1	Rd_01490	n.d.	±	0	n.d.	±	0	-	-	-	-
6.5.1.1	contig-100_597_+0_max_po1	Rd_01491	n.d.	±	0	n.d.	±	0	-	-	-	-
1.2.4.1	contig-100_3873_-1_max_po1	Rd_01492	0.0155948	±	0.00374489	0.0118067	±	0.000828278	0.401463	1154.03	754.043	0.613958
1.2.4.1	contig-100_4040_+2_max_po1	Rd_01493	0.0886134	±	0.00202464	0.0115766	±	0.00298427	2.93631	603.497	371.632	0.699472
1.2.4.1	contig-100_10290_-0_max_po1	Rd_01494	0.0155948	±	0.00374489	0.000929174	±	6.06746e-05	4.06897	361.107	134.135	1.42874
1.2.4.1	EIE85293.1	Rd_01495	0.012831	±	0.00115463	0.0105601	±	0.00237338	0.281012	1144.06	743.033	0.622663
1.2.4.1	EIE88406.1	Rd_01496	0.0438458	±	0.0110924	0.0126506	±	0.00237737	1.79323	298.825	137.147	1.12358
1.2.4.1	EIE89696.1	Rd_01497	0.141187	±	0.0155927	0.0342541	±	0.0229819	2.04325	639.289	387.482	0.722341
2.7.1.49	contig-100_2258_-1_max_po1	Rd_01498	0.0997388	±	0.015996	0.101386	±	0.0242621	-0.0236318	299.959	354.332	-0.240335
2.7.1.49	EIE92514.1	Rd_01499	0.128626	±	0.0264405	0.0995055	±	0.0161706	0.370339	294.057	352.087	-0.259835
5.3.1.8	contig-100_2848_+1_max_po1	Rd_01500	0	±	0	0.0185419	±	0.00553444	-100	1117.9	1143.02	-0.0320607
5.3.1.8	EIE85057.1	Rd_01501	0	±	0	0.027475	±	0.00702314	-100	1327.76	1343.52	-0.0170263
5.3.1.9	contig-100_2005_+0_max_po1	Rd_01502	1.54433	±	0.0639239	1.73435	±	0.0371325	-0.167414	479.968	1806.24	-1.91198
5.3.1.9	EIE91688.1	Rd_01503	2.06169	±	0.0432082	2.14485	±	0.0933202	-0.0570511	493.861	1851.34	-1.9064
5.3.1.1	contig-100_7087_-0_max_po1	Rd_01504	1.5799	±	0.0377268	1.42558	±	0.45527	0.148282	1860.5	4289.89	-1.20525
5.3.1.1	EIE78344.1	Rd_01505	1.89059	±	0.0310251	2.06222	±	0.559339	-0.125356	1928.26	4404.49	-1.19168
5.3.1.6	contig-100_1087_+2_max_po1	Rd_01506	0.0509367	±	0.0112931	0.0278368	±	0.0125918	0.87171	130.08	78.5302	0.728079
5.3.1.6	EIE86967.1	Rd_01507	0.0318221	±	0.000494342	0.0165567	±	0.00371764	0.942615	87.9231	48.1719	0.868051
2.7.4.8	contig-100_8195_+1_max_po1	Rd_01508	n.d.	±	0	n.d.	±	0	-	-	-	-
2.7.4.8	EIE78704.1	Rd_01509	n.d.	±	0	n.d.	±	0	-	157.947	217.242	-0.459858
6.3.1.14	contig-100_6819_-2_max_po1	Rd_01510	n.d.	±	0	n.d.	±	0	-	-	-	-
6.3.1.14	EIE88355.1	Rd_01511	n.d.	±	0	n.d.	±	0	-	172.527	143.862	0.262139
2.7.4.9	contig-100_941_-0_max_po1	Rd_01512	n.d.	±	0	n.d.	±	0	-	-	-	-
1.5.99.8	contig-100_2145_+0_max_po1	Rd_01513	n.d.	±	0	n.d.	±	0	-	-	-	-
1.5.99.8	EIE89937.1	Rd_01514	n.d.	±	0	n.d.	±	0	-	234.198	107.934	1.11758
1.5.99.8	EIE92078.1	Rd_01515	0.000274536	±	5.77732e-05	0.0233721	±	0.00260598	-6.41165	73.1099	667.784	-3.19124
2.3.1.16	contig-100_2342_+2_max_po1	Rd_01516	n.d.	±	0	n.d.	±	0	-	-	-	-
2.3.1.16	EIE78703.1	Rd_01517	n.d.	±	0	n.d.	±	0	-	27.0379	2.5691	3.39565
2.3.1.16	EIE80258.1	Rd_01518	0.00529918	±	0.00305863	0	±	0	100	117.633	54.8265	1.10135
2.7.11.17	contig-100_1919_-0_max_po1	Rd_01519	n.d.	±	0	n.d.	±	0	-	-	-	-
2.7.11.17	EIE80369.1	Rd_01520	n.d.	±	0	n.d.	±	0	-	144.119	87.1817	0.725161
2.7.11.17	EIE81423.1	Rd_01521	n.d.	±	0	n.d.	±	0	-	93.006	71.113	0.387212
2.7.11.17	EIE86308.1	Rd_01522	n.d.	±	0	n.d.	±	0	-	19.6547	21.5097	-0.130114
2.7.11.17	EIE88137.1	Rd_01523	n.d.	±	0	n.d.	±	0	-	2.25825	4.87727	-1.11087
2.7.11.17	EIE90361.1	Rd_01524	n.d.	±	0	n.d.	±	0	-	47.0976	36.0725	0.384754
1.7.3.3	contig-100_3560_+0_max_po1	Rd_01525	0.342543	±	0.0460607	0.107166	±	0.0228448	1.67643	591.751	954.874	-0.69032
1.7.3.3	EIE75523.1	Rd_01526	0.45868	±	0.100723	0.149503	±	0.033859	1.61731	854.118	1366.25	-0.677711
2.3.1.12	contig-100_2537_+1_max_po1	Rd_01527	0.185174	±	0.0244134	0.242707	±	0.0739602	-0.390332	736.636	624.516	0.238215
2.3.1.12	contig-100_3599_+2_max_po1	Rd_01528	0.0100304	±	0.00225568	0.0181533	±	0.00352211	-0.855848	74.9201	56.33	0.411449
2.3.1.12	EIE81648.1	Rd_01529	0.241066	±	0.0302073	0.302551	±	0.0904497	-0.327751	770.14	651.434	0.241501
2.3.1.12	EIE82374.1	Rd_01530	0.0117194	±	0.00253743	0.0234932	±	0.00550822	-1.00334	73.9561	54.5209	0.439858
2.3.1.12	EIE85676.1	Rd_01531	n.d.	±	0	n.d.	±	0	-	239.897	162.322	0.56356
1.1.1.284	contig-100_4516_+2_max_po1	Rd_01532	0.0779504	±	0.010776	0.0645134	±	0.00409816	0.272958	201.054	135.838	0.5657
3.4.19.13	contig-100_1230_-0_max_po1	Rd_01533	0.173844	±	0.0405354	0.0579741	±	0.0038766	1.58431	245.645	106.348	1.20778
3.4.19.13	contig-100_1779_-1_max_po1	Rd_01534	0.00670426	±	0.00144493	0	±	0	100	226.705	215.516	0.0730251
3.4.19.13	EIE79781.1	Rd_01535	0.208877	±	0.0323861	0.0700086	±	0.0027465	1.57705	233.536	105.262	1.14966
3.4.19.12	contig-100_92_+0_max_po1	Rd_01536	n.d.	±	0	n.d.	±	0	-	-	-	-
3.4.19.12	contig-100_282_+2_max_po1	Rd_01537	0.0108304	±	0.00164041	0.00695535	±	0.00331869	0.638888	78.952	80.7122	-0.0318114
3.4.19.12	EIE75482.1	Rd_01538	n.d.	±	0	n.d.	±	0	-	93.2137	72.98	0.353041
3.4.19.12	EIE76077.1	Rd_01539	n.d.	±	0	n.d.	±	0	-	10.1477	11.8347	-0.221868
3.4.19.12	EIE76694.1	Rd_01540	n.d.	±	0	n.d.	±	0	-	78.3047	36.4658	1.10255
3.4.19.12	EIE76867.1	Rd_01541	0.0147521	±	0.000128851	0.010405	±	0.00430939	0.503642	79.2414	80.7349	-0.0269381
3.4.19.12	EIE78675.1	Rd_01542	n.d.	±	0	n.d.	±	0	-	76.0332	70.526	0.108476
3.4.19.12	EIE79712.1	Rd_01543	n.d.	±	0	n.d.	±	0	-	40.5381	29.3949	0.463715
3.4.19.12	EIE81970.1	Rd_01544	n.d.	±	0	n.d.	±	0	-	146.311	116.09	0.333789
3.4.19.12	EIE83632.1	Rd_01545	n.d.	±	0	n.d.	±	0	-	46.686	30.4022	0.618813
3.4.19.12	EIE84498.1	Rd_01546	n.d.	±	0	n.d.	±	0	-	64.2343	49.2063	0.384502
3.4.19.12	EIE84755.1	Rd_01547	n.d.	±	0	n.d.	±	0	-	28.0947	23.4938	0.258015
3.4.19.12	EIE84989.1	Rd_01548	n.d.	±	0	n.d.	±	0	-	102.615	70.9344	0.532681
3.4.19.12	EIE85862.1	Rd_01549	n.d.	±	0	n.d.	±	0	-	29.1012	18.0682	0.687624
3.4.19.12	EIE87684.1	Rd_01550	n.d.	±	0	n.d.	±	0	-	96.2065	74.6167	0.366636
3.4.19.12	EIE88115.1	Rd_01551	n.d.	±	0	n.d.	±	0	-	125.576	57.86	1.11792
3.4.19.12	EIE88648.1	Rd_01552	n.d.	±	0	n.d.	±	0	-	23.9383	13.3736	0.839931
3.4.19.12	EIE88677.1	Rd_01553	n.d.	±	0	n.d.	±	0	-	121.807	108.611	0.165433
3.4.19.12	EIE89113.1	Rd_01554	n.d.	±	0	n.d.	±	0	-	53.2592	43.1721	0.30293
3.4.19.12	EIE91069.1	Rd_01555	n.d.	±	0	n.d.	±	0	-	22.2427	13.5025	0.720109
3.1.2.14	contig-100_2_-1_max_po1	Rd_01556	0.0532545	±	0.00537616	0.10982	±	0.00839825	-1.04416	110.402	196.888	-0.834611
3.1.2.14	EIE91460.1	Rd_01557	0.084381	±	0.0112705	0.132325	±	0.0124511	-0.649092	43.2619	68.9614	-0.672692
3.1.2.12	contig-100_6020_+1_max_po2	Rd_01558	0.0173265	±	0.00147797	0.0110598	±	0.00694322	0.647657	173.625	113.622	0.611728
1.4.1.3	EIE80124.1	Rd_01559	n.d.	±	0	n.d.	±	0	-	4.46772	4.00661	0.157157
3.5.2.17	EIE76252.1	Rd_01560	n.d.	±	0	n.d.	±	0	-	n.d.	n.d.	-
2.5.1.46	contig-100_4479_-2_max_po1	Rd_01561	n.d.	±	0	n.d.	±	0	-	-	-	-
2.5.1.46	EIE85451.1	Rd_01562	n.d.	±	0	n.d.	±	0	-	32.5914	46.3037	-0.506638
2.5.1.47	contig-100_2302_-2_max_po1	Rd_01563	n.d.	±	0	n.d.	±	0	-	-	-	-
2.5.1.47	contig-100_4981_+0_max_po1	Rd_01564	0.0677095	±	0.000830621	0.0616577	±	0.0160067	0.135077	180.978	174.017	0.0565882
2.5.1.47	EIE81016.1	Rd_01565	0.0862422	±	0.000590126	0.0709527	±	0.0181706	0.281537	183.603	174.002	0.0774841
2.5.1.47	EIE88225.1	Rd_01566	n.d.	±	0	n.d.	±	0	-	28.1957	27.9721	0.0114837
2.5.1.48	contig-100_1916_+1_max_po1	Rd_01567	n.d.	±	0	n.d.	±	0	-	-	-	-
2.5.1.48	EIE87144.1	Rd_01568	n.d.	±	0	n.d.	±	0	-	54.2865	76.1362	-0.487989
2.5.1.49	contig-100_2302_-2_max_po1	Rd_01569	n.d.	±	0	n.d.	±	0	-	-	-	-
2.5.1.49	EIE88225.1	Rd_01570	n.d.	±	0	n.d.	±	0	-	28.1957	27.9721	0.0114837
1.6.2.4	contig-100_1252_+1_max_po1	Rd_01571	n.d.	±	0	n.d.	±	0	-	-	-	-
1.6.2.4	contig-100_1315_-0_max_po1	Rd_01572	0.00347103	±	0.000809934	0	±	0	100	129.547	108.364	0.257584
1.6.2.4	EIE77771.1	Rd_01573	n.d.	±	0	n.d.	±	0	-	22.5581	17.276	0.384877
1.6.2.4	EIE89541.1	Rd_01574	0.00790849	±	0.00206306	0	±	0	100	130.154	107.144	0.280664
1.6.2.2	contig-100_261_-0_max_po1	Rd_01575	n.d.	±	0	n.d.	±	0	-	-	-	-
1.6.2.2	contig-100_4956_-2_max_po1	Rd_01576	0.0417296	±	0.00278726	0.03242	±	0.00716283	0.364186	322.113	191.306	0.751683
1.6.2.2	contig-100_6160_-2_max_po1	Rd_01577	0.00618061	±	0.000959881	0.0100291	±	0.00141627	-0.698368	242.037	178.28	0.44108
1.6.2.2	EIE78516.1	Rd_01578	0.0048989	±	0.00297082	0.0115618	±	0.000368131	-1.23884	262.018	191.332	0.453589
1.6.2.2	EIE80321.1	Rd_01579	n.d.	±	0	n.d.	±	0	-	137.399	157.401	-0.196077
1.6.2.2	EIE81456.1	Rd_01580	n.d.	±	0	n.d.	±	0	-	270.225	253.688	0.0911058
1.6.2.2	EIE83495.1	Rd_01581	0.0625092	±	0.00211406	0.0324092	±	0.00319716	0.947664	344.939	201.925	0.772519
3.5.4.26	contig-100_8395_-2_max_po1	Rd_01582	n.d.	±	0	n.d.	±	0	-	-	-	-
2.7.1.67	contig-100_60_+1_max_po1	Rd_01583	0	±	0	0.00065707	±	0.00029938	-100	25.4194	18.6986	0.443001
2.7.1.67	EIE75657.1	Rd_01584	n.d.	±	0	n.d.	±	0	-	25.4185	18.5367	0.455497
2.7.1.67	EIE79290.1	Rd_01585	n.d.	±	0	n.d.	±	0	-	35.6086	32.9075	0.113809
2.7.1.67	EIE84176.1	Rd_01586	n.d.	±	0	n.d.	±	0	-	44.8142	48.6165	-0.117489
2.7.1.67	EIE84301.1	Rd_01587	n.d.	±	0	n.d.	±	0	-	14.8192	7.34855	1.01194
1.15.1.1	contig-100_2525_-1_max_po2	Rd_01588	n.d.	±	0	n.d.	±	0	-	-	-	-
1.15.1.1	contig-100_8972_+2_max_po1	Rd_01589	0.0384269	±	0.00350998	0.0212239	±	0.00929121	0.856428	7.97959	4.72999	0.754478
1.15.1.1	contig-100_8991_+2_max_po1	Rd_01590	0.138319	±	0.0263559	0.0574859	±	0.000173106	1.26672	432.559	255.017	0.762302
1.15.1.1	contig-100_9179_-2_max_po1	Rd_01591	0.282484	±	0.054578	0.174398	±	0.00857433	0.695785	473.251	671.867	-0.505571
1.15.1.1	contig-100_9299_-0_max_po1	Rd_01592	0	±	0	0.00663875	±	0.00489761	-100	42.3135	169.82	-2.00482
1.15.1.1	EIE77414.1	Rd_01593	n.d.	±	0	n.d.	±	0	-	182.851	45.0736	2.02032
1.15.1.1	EIE78329.1	Rd_01594	0.37214	±	0.00860319	0.134445	±	0.0161431	1.46883	500.804	289.497	0.790699
1.15.1.1	EIE83111.1	Rd_01595	0.194698	±	0.0234738	0.0916715	±	0.00640393	1.0867	3.10458	1.24535	1.31784
1.15.1.1	EIE83236.1	Rd_01596	0.194698	±	0.0234738	0.119718	±	0.0160754	0.701606	535.699	748.809	-0.483174
1.15.1.1	EIE85909.1	Rd_01597	n.d.	±	0	n.d.	±	0	-	41.2228	164.16	-1.99359
1.15.1.1	EIE86366.1	Rd_01598	0.0454166	±	0.00537382	0.0256814	±	0.010783	0.822498	8.16384	4.14916	0.976428
3.5.4.25	contig-100_4166_-2_max_po1	Rd_01599	n.d.	±	0	n.d.	±	0	-	-	-	-
3.5.4.25	EIE82739.1	Rd_01600	n.d.	±	0	n.d.	±	0	-	40.031	47.2198	-0.238277
2.1.1.166	contig-100_7511_+2_max_po1	Rd_01601	n.d.	±	0	n.d.	±	0	-	-	-	-
2.1.1.166	EIE82089.1	Rd_01602	n.d.	±	0	n.d.	±	0	-	87.3198	61.9712	0.49471
1.10.2.2	contig-100_6497_+0_max_po1	Rd_01603	n.d.	±	0	n.d.	±	0	-	-	-	-
1.10.2.2	EIE76713.1	Rd_01604	n.d.	±	0	n.d.	±	0	-	91.654	54.7122	0.744335
1.10.2.2	EIE86412.1	Rd_01605	n.d.	±	0	n.d.	±	0	-	380.338	235.165	0.69361
1.10.2.2	EIE89125.1	Rd_01606	0	±	0	0.0203612	±	0.00138483	-100	509.451	240.008	1.08586
2.3.1.158	contig-100_1405_+1_max_po1	Rd_01607	n.d.	±	0	n.d.	±	0	-	-	-	-
3.4.22.68	contig-100_2448_-2_max_po1	Rd_01608	n.d.	±	0	n.d.	±	0	-	-	-	-
2.1.1.228	contig-100_3327_+1_max_po1	Rd_01609	n.d.	±	0	n.d.	±	0	-	-	-	-
2.1.1.228	EIE84299.1	Rd_01610	n.d.	±	0	n.d.	±	0	-	26.3027	28.4303	-0.112221
6.3.3.3	contig-100_969_+0_max_po1	Rd_01611	0.0765421	±	0.00532849	0.064061	±	0.00530887	0.256807	182.792	182.356	0.00344828
6.3.3.2	contig-100_281_+0_max_po1	Rd_01612	n.d.	±	0	n.d.	±	0	-	-	-	-
6.3.3.1	contig-100_939_-0_max_po1	Rd_01613	0.00219504	±	0.0015083	0	±	0	100	95.331	56.2914	0.760031
6.3.3.1	EIE91602.1	Rd_01614	0.00261384	±	0.00177797	0	±	0	100	87.8158	52.1115	0.752879
6.3.5.1	contig-100_1275_-1_max_po1	Rd_01615	n.d.	±	0	n.d.	±	0	-	-	-	-
6.3.5.1	EIE91950.1	Rd_01616	n.d.	±	0	n.d.	±	0	-	146.362	323.259	-1.14315
6.3.5.3	contig-100_126_-0_max_po1	Rd_01617	0.0406199	±	0.0036737	0.0190377	±	0.00226814	1.09333	86.6357	79.9267	0.116284
6.3.5.3	EIE85383.1	Rd_01618	0.0563897	±	0.00396455	0.0249003	±	0.00121566	1.17927	86.9183	78.7256	0.142826
6.3.5.2	contig-100_2244_+1_max_po1	Rd_01619	0.0794064	±	0.000427289	0.00327206	±	0.000972262	4.60099	517.926	179.828	1.52613
6.3.5.2	EIE77811.1	Rd_01620	0.0889825	±	0.00405	0.00405101	±	0.00120145	4.45717	538.529	185.314	1.53905
6.3.5.5	contig-100_20_+0_max_po2	Rd_01621	n.d.	±	0	n.d.	±	0	-	-	-	-
6.3.5.5	EIE81176.1	Rd_01622	n.d.	±	0	n.d.	±	0	-	232.579	352.934	-0.601674
6.3.5.5	EIE81387.1	Rd_01623	0.00016701	±	1.24259e-06	0	±	0	100	69.0843	16.2644	2.08664
6.3.5.5	EIE88151.1	Rd_01624	n.d.	±	0	n.d.	±	0	-	1028.21	1457.21	-0.503076
6.3.5.5	EIE90353.1	Rd_01625	n.d.	±	0	n.d.	±	0	-	0.232363	0.408058	-0.81239
6.3.5.4	contig-100_2133_+0_max_po1	Rd_01626	0.0316064	±	0.00155634	0.0598166	±	0.0238518	-0.920332	470.65	1028.4	-1.12767
6.3.5.4	EIE91223.1	Rd_01627	0.0418764	±	0.0033712	0.0757723	±	0.020992	-0.855532	482.927	1038.93	-1.10523
3.4.23.21	contig-100_772_-2_max_po1	Rd_01628	0.0720609	±	0.00601618	0.0168113	±	0.00389416	2.09978	160.5	14.9906	3.42044
3.4.23.21	contig-100_1774_+2_max_po1	Rd_01629	0.649026	±	0.00360338	0.18998	±	0.0528717	1.77243	1985.78	113.931	4.12346
3.4.23.21	contig-100_3868_-2_max_po1	Rd_01630	0.75703	±	0.0082351	0.113809	±	0.0115517	2.73374	2941.35	343.676	3.09736
3.4.23.21	contig-100_4061_-1_max_po1	Rd_01631	0.104179	±	0.040627	0	±	0	100	1401.19	108.651	3.68888
3.4.23.21	EIE77055.1	Rd_01632	0.0315957	±	0.00204393	0.0171147	±	0.00387379	0.884496	155.841	5.23511	4.89571
3.4.23.21	EIE77058.1	Rd_01633	0.0315957	±	0.00204393	0.0171147	±	0.00387379	0.884496	148.351	6.86963	4.43264
3.4.23.21	EIE77497.1	Rd_01634	0.977481	±	0.00997361	0.162943	±	0.00325592	2.5847	3138.77	362.787	3.113
3.4.23.21	EIE88111.1	Rd_01635	0.141324	±	0.0507582	0	±	0	100	1463.32	111.975	3.70799
3.4.23.21	EIE88619.1	Rd_01636	0.0315957	±	0.00204393	0.0104427	±	0.00225342	1.59724	15.1352	0.41663	5.183
3.4.23.21	EIE92312.1	Rd_01637	0.840704	±	0.0162902	0.242178	±	0.0583581	1.79553	3281.59	161.764	4.34243
5.5.1.4	contig-100_2208_+1_max_po1	Rd_01638	0.525243	±	0.0297224	0.636626	±	0.134236	-0.277461	2695.33	4465.56	-0.728377
5.5.1.4	EIE79446.1	Rd_01639	0.70154	±	0.0485349	0.742809	±	0.131826	-0.0824654	2757.65	4438.05	-0.686486
3.4.16.5	contig-100_2506_+1_max_po1	Rd_01640	2.03614	±	0.301851	1.14473	±	0.0360394	0.83083	1925.95	1365.48	0.496162
3.4.16.5	EIE76220.1	Rd_01641	0	±	0	0.121931	±	0.0151542	-100	28.0172	15.3186	0.871029
3.4.16.5	EIE84575.1	Rd_01642	3.01098	±	0.0831946	1.4457	±	0.047758	1.05847	2020.5	1411.86	0.517118
2.4.99.18	contig-100_896_+2_po1	Rd_01643	n.d.	±	0	n.d.	±	0	-	-	-	-
2.4.99.18	contig-100_988_-1_max_po1	Rd_01644	0	±	0	0.0166584	±	0.00209116	-100	169.509	106.183	0.674816
2.4.99.18	EIE80503.1	Rd_01645	0	±	0	0.0191835	±	0.00303148	-100	173.403	107.006	0.696434
2.4.99.18	EIE81112.1	Rd_01646	n.d.	±	0	n.d.	±	0	-	483.566	473.506	0.0303307
4.2.1.96	contig-100_4416_-2_max_po1	Rd_01647	n.d.	±	0	n.d.	±	0	-	-	-	-
4.2.1.96	EIE89666.1	Rd_01648	n.d.	±	0	n.d.	±	0	-	101.165	86.2842	0.229542
2.7.13.3	contig-100_4_+0_max_po3	Rd_01649	n.d.	±	0	n.d.	±	0	-	-	-	-
2.7.13.3	contig-100_7587_+2_max_po1	Rd_01650	1.41911	±	0.234341	1.39523	±	0.200741	0.024479	728.233	303.726	1.26163
2.7.13.3	contig-100_11503_-1_max_po1	Rd_01651	0.49175	±	0.0144023	0.289414	±	0.0413351	0.76479	293.058	123.311	1.24889
2.7.13.3	EIE75568.1	Rd_01652	n.d.	±	0	n.d.	±	0	-	26.2182	20.4956	0.355256
2.7.13.3	EIE75809.1	Rd_01653	n.d.	±	0	n.d.	±	0	-	20.5299	17.2607	0.250234
2.7.13.3	EIE77162.1	Rd_01654	n.d.	±	0	n.d.	±	0	-	18.5563	6.98053	1.4105
2.7.13.3	EIE77585.1	Rd_01655	n.d.	±	0	n.d.	±	0	-	1.49851	5.3545	-1.83723
2.7.13.3	EIE78286.1	Rd_01656	n.d.	±	0	n.d.	±	0	-	27.6483	30.4553	-0.139502
2.7.13.3	EIE80047.1	Rd_01657	n.d.	±	0	n.d.	±	0	-	20.1533	18.172	0.149301
2.7.13.3	EIE82094.1	Rd_01658	n.d.	±	0	n.d.	±	0	-	12.7443	7.5321	0.758732
2.7.13.3	EIE83498.1	Rd_01659	n.d.	±	0	n.d.	±	0	-	42.8911	37.9632	0.176078
2.7.13.3	EIE83662.1	Rd_01660	n.d.	±	0	n.d.	±	0	-	7.61731	10.184	-0.418948
2.7.13.3	EIE85744.1	Rd_01661	0.657896	±	0.0230794	0.492166	±	0.0438947	0.418713	302.265	123.43	1.29212
2.7.13.3	EIE86357.1	Rd_01662	1.40174	±	0.247167	1.16913	±	0.166966	0.261778	852.907	343.781	1.3109
2.7.13.3	EIE86498.1	Rd_01663	0.000656661	±	6.40303e-05	0.000721681	±	0.000131202	-0.136214	40.3358	33.0771	0.286227
2.7.13.3	EIE89620.1	Rd_01664	n.d.	±	0	n.d.	±	0	-	20.4364	16.1569	0.338991
2.7.13.3	EIE91775.1	Rd_01665	n.d.	±	0	n.d.	±	0	-	22.7918	11.7746	0.952839
5.1.3.2	contig-100_1224_-2_po2	Rd_01666	n.d.	±	0	n.d.	±	0	-	-	-	-
5.1.3.2	EIE77207.1	Rd_01667	n.d.	±	0	n.d.	±	0	-	63.0712	49.0815	0.361802
5.1.3.2	EIE80443.1	Rd_01668	0.140444	±	0.00116871	0.0728259	±	0.00240026	0.947476	233.157	230.806	0.0146224
2.7.7.63	contig-100_6131_+0_max_po1	Rd_01669	n.d.	±	0	n.d.	±	0	-	-	-	-
5.1.3.3	contig-100_2526_-0_max_po1	Rd_01670	n.d.	±	0	n.d.	±	0	-	-	-	-
5.1.3.3	contig-100_4562_+0_max_po1	Rd_01671	0.00147501	±	0.00054645	0	±	0	100	30.5392	20.3312	0.586968
5.1.3.3	EIE78216.1	Rd_01672	n.d.	±	0	n.d.	±	0	-	6.01923	11.9648	-0.991141
4.1.2.25	contig-100_334_-1_max_po1	Rd_01673	n.d.	±	0	n.d.	±	0	-	-	-	-
4.1.2.25	EIE86333.1	Rd_01674	n.d.	±	0	n.d.	±	0	-	36.1526	32.6194	0.148369
4.1.2.27	contig-100_2226_+2_max_po1	Rd_01675	n.d.	±	0	n.d.	±	0	-	-	-	-
4.1.2.27	EIE87798.1	Rd_01676	n.d.	±	0	n.d.	±	0	-	293.484	434.959	-0.567595
2.7.2.3	contig-100_3604_-2_max_po1	Rd_01677	0.883109	±	0.221014	1.06821	±	0.0688827	-0.274536	507.967	4849.51	-3.25503
2.7.2.3	contig-100_3798_-2_max_po1	Rd_01678	2.51026	±	0.364153	2.5865	±	0.0572326	-0.043164	1836.25	2006.01	-0.12757
2.7.2.3	EIE83336.1	Rd_01679	2.97152	±	0.443362	4.34523	±	0.140336	-0.54823	505.253	4888.15	-3.27421
2.7.2.3	EIE90522.1	Rd_01680	0.95707	±	0.0185488	0.705605	±	0.0563298	0.439763	1883.7	2052.15	-0.123569
6.3.2.2	contig-100_1393_+2_max_po1	Rd_01681	0.00366236	±	0.00222119	0	±	0	100	145.375	215.615	-0.568675
6.3.2.2	EIE78651.1	Rd_01682	0.00583255	±	0.00362604	0	±	0	100	162.736	238.489	-0.551382
3.7.1.3	contig-100_784_-1_max_po1	Rd_01683	0.0372467	±	0.0113547	0.0248335	±	0.00239771	0.584823	301.958	197.821	0.61015
3.7.1.3	EIE78424.1	Rd_01684	0.0608602	±	0.0111248	0.0470338	±	0.00456939	0.3718	500.406	325.416	0.620813
4.3.1.17	contig-100_1285_-0_max_po1	Rd_01685	n.d.	±	0	n.d.	±	0	-	-	-	-
4.3.1.17	contig-100_3167_-1_max_po1	Rd_01686	0.0902346	±	0.00745066	0.0101104	±	0.00215243	3.15784	369.894	219.392	0.753602
4.3.1.17	EIE77707.1	Rd_01687	0.16362	±	0.00417128	0.0110592	±	0.00119882	3.88704	504.582	300.376	0.748319
4.3.1.17	EIE78023.1	Rd_01688	n.d.	±	0	n.d.	±	0	-	5.12646	5.90158	-0.203138
4.3.1.17	EIE86776.1	Rd_01689	n.d.	±	0	n.d.	±	0	-	105.128	69.8958	0.588874
4.2.1.2	contig-100_341_+2_max_po1	Rd_01690	1.51366	±	0.160236	0.656458	±	0.0605321	1.20527	604.553	455.531	0.40832
4.2.1.2	EIE78369.1	Rd_01691	2.07491	±	0.202023	0.846596	±	0.0651246	1.2933	1247.08	941.093	0.406149
4.3.1.19	contig-100_2475_+0_max_po1	Rd_01692	n.d.	±	0	n.d.	±	0	-	-	-	-
4.3.1.19	EIE78061.1	Rd_01693	n.d.	±	0	n.d.	±	0	-	53.948	227.317	-2.07507
4.2.1.3	contig-100_885_-2_max_po1	Rd_01694	n.d.	±	0	n.d.	±	0	-	-	-	-
4.2.1.3	EIE81180.1	Rd_01695	n.d.	±	0	n.d.	±	0	-	1066.37	140.806	2.92093
4.2.1.3	EIE85567.1	Rd_01696	0	±	0	0.0430037	±	0.0381924	-100	141.874	680.946	-2.26293
4.2.1.3	EIE89731.1	Rd_01697	n.d.	±	0	n.d.	±	0	-	112.423	169.148	-0.589355
4.2.1.1	EIE86040.1	Rd_01698	0.119193	±	0.00505281	0	±	0	100	388.906	111.138	1.80706
2.5.1.58	contig-100_3566_-1_max_po1	Rd_01699	n.d.	±	0	n.d.	±	0	-	-	-	-
2.5.1.58	EIE91046.1	Rd_01700	n.d.	±	0	n.d.	±	0	-	23.1126	22.6206	0.0310436
2.7.7.79	contig-100_6640_+2_max_po1	Rd_01701	n.d.	±	0	n.d.	±	0	-	-	-	-
2.7.7.79	EIE82755.1	Rd_01702	n.d.	±	0	n.d.	±	0	-	41.5097	34.7386	0.25691
2.7.7.75	contig-100_1525_+1_max_po1	Rd_01703	n.d.	±	0	n.d.	±	0	-	-	-	-
2.7.7.75	EIE91014.1	Rd_01704	n.d.	±	0	n.d.	±	0	-	50.8174	43.8168	0.213837
4.2.1.134	contig-100_7018_-2_max_po1	Rd_01705	n.d.	±	0	n.d.	±	0	-	-	-	-
6.3.4.4	contig-100_3338_+0_max_po2	Rd_01706	0.0102352	±	0.00039699	0	±	0	100	201.113	157.644	0.351333
6.3.4.4	EIE83547.1	Rd_01707	0.0116462	±	0.000644488	0.0182913	±	0.0103673	-0.651298	190.189	145.917	0.38229
6.3.4.5	EIE79940.1	Rd_01708	0.86151	±	0.0721483	0.571689	±	0.0526839	0.591637	838.617	1082.93	-0.36885
6.3.4.5	EIE80741.1	Rd_01709	0	±	0	0.0417122	±	0.0162669	-100	237.557	825.669	-1.79729
3.1.3.53	contig-100_2516_-1_max_po1	Rd_01710	0	±	0	0.000692776	±	2.15747e-05	-100	121.127	61.0787	0.987774
3.1.3.53	contig-100_3544_-2_max_po1	Rd_01711	0	±	0	0.000692776	±	2.15747e-05	-100	104.412	104.698	-0.00395189
3.1.3.53	EIE75924.1	Rd_01712	n.d.	±	0	n.d.	±	0	-	34.516	35.6233	-0.0455571
3.1.3.53	EIE84226.1	Rd_01713	0.12197	±	0.043414	0.0743619	±	0.0116452	0.713891	300.718	235.99	0.34969
3.1.3.53	EIE88121.1	Rd_01714	n.d.	±	0	n.d.	±	0	-	221.149	153.647	0.525399
3.1.3.53	EIE88674.1	Rd_01715	0.00123005	±	8.7267e-05	0.000924103	±	3.89474e-05	0.412596	142.186	71.0165	1.00155
6.3.4.2	contig-100_2057_-0_max_po1	Rd_01716	n.d.	±	0	n.d.	±	0	-	-	-	-
6.3.4.2	EIE78314.1	Rd_01717	n.d.	±	0	n.d.	±	0	-	78.272	46.0744	0.76453
6.3.4.2	EIE78512.1	Rd_01718	n.d.	±	0	n.d.	±	0	-	69.8793	20.5582	1.76515
3.1.13.4	contig-100_480_+1_max_po1	Rd_01719	n.d.	±	0	n.d.	±	0	-	-	-	-
3.1.13.4	EIE75646.1	Rd_01720	n.d.	±	0	n.d.	±	0	-	68.4913	66.5914	0.0405847
2.7.1.6	contig-100_3585_+0_max_po1	Rd_01721	n.d.	±	0	n.d.	±	0	-	-	-	-
2.7.1.6	EIE81676.1	Rd_01722	n.d.	±	0	n.d.	±	0	-	36.2055	18.6884	0.954068
2.7.1.1	contig-100_1665_-2_max_po2	Rd_01723	n.d.	±	0	n.d.	±	0	-	-	-	-
2.7.1.1	EIE80377.1	Rd_01724	0.0752259	±	0.0471364	0.0716861	±	0.00689126	0.0695354	36.9077	7.14777	2.36836
2.7.1.1	EIE88652.1	Rd_01725	n.d.	±	0	n.d.	±	0	-	140.139	58.5825	1.25832
1.9.3.1	contig-100_3368_+1_max_po2	Rd_01726	0.170186	±	0.0336594	0.117939	±	0.0361569	0.52907	4.37071	19.4462	-2.15355
1.9.3.1	contig-100_10452_-2_max_po1	Rd_01727	0.100655	±	0.0248885	0.169892	±	0.0490214	-0.755201	0.329032	17.7579	-5.75409
1.9.3.1	EIE76370.1	Rd_01728	n.d.	±	0	n.d.	±	0	-	1642.86	1579.47	0.0567707
2.7.1.71	contig-100_49_-1_max_po1	Rd_01729	0.00220106	±	0.000491599	0.00584768	±	0.0031268	-1.40967	38.8157	67.893	-0.806622
2.7.1.71	EIE85491.1	Rd_01730	0.00312603	±	0.000962128	0.00772556	±	0.00339004	-1.30531	39.4182	67.0823	-0.767072
4.1.1.21	contig-100_2411_+0_max_po1	Rd_01731	0.0600089	±	0.00149476	0.00628063	±	0.000727949	3.2562	112.447	40.1429	1.48603
4.1.1.23	contig-100_5646_-0_max_po1	Rd_01732	n.d.	±	0	n.d.	±	0	-	-	-	-
4.1.1.23	EIE89797.1	Rd_01733	n.d.	±	0	n.d.	±	0	-	127.794	73.1932	0.804044
4.1.99.18	contig-100_2259_+2_max_po1	Rd_01734	n.d.	±	0	n.d.	±	0	-	-	-	-
4.1.99.12	contig-100_7568_-1_max_po1	Rd_01735	n.d.	±	0	n.d.	±	0	-	-	-	-
4.1.99.12	EIE76580.1	Rd_01736	n.d.	±	0	n.d.	±	0	-	78.4877	77.9408	0.0100879
4.1.3.4	contig-100_4883_+1_max_po1	Rd_01737	n.d.	±	0	n.d.	±	0	-	-	-	-
4.1.3.4	EIE76390.1	Rd_01738	n.d.	±	0	n.d.	±	0	-	40.2913	9.00184	2.16218
4.1.3.1	contig-100_2182_-0_max_po1	Rd_01739	n.d.	±	0	n.d.	±	0	-	-	-	-
4.1.3.1	EIE79026.1	Rd_01740	n.d.	±	0	n.d.	±	0	-	33.3014	0.791571	5.39472
3.5.2.5	contig-100_2916_-1_max_po1	Rd_01741	0.0416436	±	0.00229053	0	±	0	100	155.248	177.731	-0.195114
3.5.2.5	EIE81679.1	Rd_01742	0.0275809	±	0.00181817	0.0133906	±	0.00149024	1.04244	102.435	101.484	0.0134573
3.5.2.6	contig-100_6114_+0_max_po1	Rd_01743	n.d.	±	0	n.d.	±	0	-	-	-	-
6.3.1.2	contig-100_4564_-1_max_po1	Rd_01744	0.236492	±	0.0418075	0.0153424	±	0.00706406	3.94619	2016.13	1135.8	0.827873
6.3.1.2	contig-100_4793_+1_max_po1	Rd_01745	0.16057	±	0.125704	0.0392329	±	0.011198	2.03306	1346.98	1920.21	-0.511529
6.3.1.2	EIE89307.1	Rd_01746	0.313556	±	0.0352305	0.031199	±	0.0010731	3.32915	2088.37	1171.27	0.834312
3.5.2.3	contig-100_285_-1_max_po1	Rd_01747	0.0870596	±	0.00543199	0.0559244	±	0.0113744	0.638525	49.3898	48.4899	0.0265305
3.5.2.3	EIE92232.1	Rd_01748	0.121384	±	0.00815544	0.0721947	±	0.0148292	0.749608	86.1878	106.523	-0.305616
3.5.2.9	contig-100_33_+1_max_po1	Rd_01749	0.0130868	±	0.000964037	0.0015647	±	0.000520425	3.06415	130.416	70.2261	0.893038
3.5.2.9	EIE85036.1	Rd_01750	0.0143829	±	0.000953301	0.00227368	±	0.000702014	2.66125	123.437	61.0752	1.01511
3.5.1.25	EIE86384.1	Rd_01751	n.d.	±	0	n.d.	±	0	-	n.d.	n.d.	-
4.1.1.49	contig-100_2170_-2_max_po1	Rd_01752	0.00251368	±	0.00106542	0.00318844	±	0.000940563	-0.343051	97.182	100.784	-0.0525094
4.1.1.49	EIE85653.1	Rd_01753	0.00166369	±	0.000195653	0	±	0	100	35.2479	28.5686	0.303107
3.5.4.16	contig-100_918_-0_max_po1	Rd_01754	0	±	0	0.00606732	±	0.00184519	-100	122.625	149.262	-0.283588
1.3.3.6	contig-100_1299_-0_max_po1	Rd_01755	n.d.	±	0	n.d.	±	0	-	-	-	-
1.3.3.6	EIE80696.1	Rd_01756	n.d.	±	0	n.d.	±	0	-	4.3035	3.10268	0.471994
1.3.3.6	EIE82728.1	Rd_01757	n.d.	±	0	n.d.	±	0	-	17.631	19.4397	-0.140895
1.3.3.6	EIE82914.1	Rd_01758	n.d.	±	0	n.d.	±	0	-	27.7129	21.0063	0.399737
1.3.3.6	EIE86342.1	Rd_01759	n.d.	±	0	n.d.	±	0	-	62.3806	65.7259	-0.0753641
1.3.3.3	contig-100_33_-0_max_po1	Rd_01760	0.00682915	±	0.000568686	0.00932384	±	0.00494856	-0.449217	130.416	70.2261	0.893038
1.3.3.3	contig-100_5046_+1_max_po1	Rd_01761	0.167567	±	0.0150597	0.669604	±	0.0549959	-1.99857	142.311	2525.88	-4.14967
1.3.3.3	EIE85035.1	Rd_01762	0.00997566	±	0.000598469	0.0151726	±	0.0034199	-0.604983	89.9332	63.201	0.508905
1.3.3.3	EIE89301.1	Rd_01763	0.198435	±	0.0234061	0.767225	±	0.0870345	-1.95098	148.72	2639.73	-4.14972
3.6.3.44	contig-100_144_+2_max_po1	Rd_01764	0.00423919	±	0.000774638	0.00397115	±	0.000271379	0.0942312	130.518	81.4336	0.680558
3.6.3.44	contig-100_174_+1_max_po1	Rd_01765	0.015401	±	0.00629329	0.0121019	±	0.0024459	0.347789	74.9221	38.9343	0.944347
3.6.3.44	EIE81163.1	Rd_01766	0.0187795	±	0.00702185	0.0144203	±	0.00111643	0.381054	22.9134	3.93706	2.541
3.6.3.44	EIE84922.1	Rd_01767	0.0109276	±	0.00165008	0.0124252	±	0.00418861	-0.185292	130.102	80.5115	0.692376
3.6.3.44	EIE91016.1	Rd_01768	0.0187795	±	0.00702185	0.0144203	±	0.00111643	0.381054	73.3172	38.1484	0.942528
1.11.1.15	contig-100_2231_-0_max_po1	Rd_01769	0	±	0	0.0571037	±	0.0138329	-100	290.776	580.472	-0.997317
1.11.1.15	contig-100_7227_+2_max_po1	Rd_01770	0.0955354	±	0.01607	0.0149706	±	0.00443346	2.6739	339.388	234.523	0.533202
1.11.1.15	EIE77758.1	Rd_01771	0.0588404	±	0.00411149	0.0976458	±	0.00181065	-0.73075	992.987	850.631	0.223241
1.11.1.15	EIE77923.1	Rd_01772	0.0226115	±	0.0106974	0.104431	±	0.0073848	-2.20742	618.154	1387.87	-1.16683
1.11.1.15	EIE83712.1	Rd_01773	0.193723	±	0.0109954	0.100296	±	0.010948	0.949738	461.592	374.651	0.301071
1.11.1.15	EIE87578.1	Rd_01774	1.70264	±	0.227671	1.08653	±	0.157692	0.648046	506.751	493.307	0.0387886
1.11.1.15	EIE91012.1	Rd_01775	0.113218	±	0.0107708	0.0215729	±	0.0059425	2.39182	362.351	246.113	0.558066
1.11.1.15	EIE91306.1	Rd_01776	n.d.	±	0	n.d.	±	0	-	154.385	101.431	0.606036
2.1.1.125	contig-100_1885_+0_max_po1	Rd_01777	n.d.	±	0	n.d.	±	0	-	-	-	-
2.1.1.125	EIE90296.1	Rd_01778	n.d.	±	0	n.d.	±	0	-	31.4971	27.3434	0.204029
2.1.1.125	EIE90908.1	Rd_01779	n.d.	±	0	n.d.	±	0	-	43.1509	21.4215	1.01033
2.1.1.125	EIE91214.1	Rd_01780	0	±	0	0.00489669	±	0.00053456	-100	67.1937	60.2359	0.1577
3.6.1.43	contig-100_8039_+2_max_po1	Rd_01781	n.d.	±	0	n.d.	±	0	-	-	-	-
2.4.1.198	EIE75745.1	Rd_01782	n.d.	±	0	n.d.	±	0	-	n.d.	n.d.	-
1.3.5.1	contig-100_5836_-1_max_po1	Rd_01783	0.0100162	±	0.00247744	0	±	0	100	815.301	711.889	0.195681
1.3.5.1	EIE79111.1	Rd_01784	0.0128706	±	0.00327532	0.00296913	±	0.000220863	2.11597	800.441	702.273	0.188762
1.3.5.1	EIE80047.1	Rd_01785	n.d.	±	0	n.d.	±	0	-	20.1533	18.172	0.149301
1.3.5.1	EIE82583.1	Rd_01786	0.00539589	±	0.0010877	0.00125207	±	0.000172052	2.10755	105.298	25.7946	2.02933
1.3.5.1	EIE88610.1	Rd_01787	0.00539589	±	0.0010877	0.00125207	±	0.000172052	2.10755	127.326	141.782	-0.155147
1.14.13.9	contig-100_2771_-0_max_po1	Rd_01788	n.d.	±	0	n.d.	±	0	-	-	-	-
3.6.4.12	contig-100_16_+0_max_po1	Rd_01789	n.d.	±	0	n.d.	±	0	-	-	-	-
3.6.4.12	EIE76868.1	Rd_01790	n.d.	±	0	n.d.	±	0	-	42.8165	23.526	0.863907
3.6.4.12	EIE77195.1	Rd_01791	n.d.	±	0	n.d.	±	0	-	28.3765	27.0985	0.0664859
3.6.4.12	EIE77372.1	Rd_01792	n.d.	±	0	n.d.	±	0	-	7.24271	5.39727	0.4243
3.6.4.12	EIE77396.1	Rd_01793	n.d.	±	0	n.d.	±	0	-	52.5343	40.1222	0.38886
3.6.4.12	EIE77498.1	Rd_01794	n.d.	±	0	n.d.	±	0	-	62.8811	56.9771	0.142244
3.6.4.12	EIE77672.1	Rd_01795	n.d.	±	0	n.d.	±	0	-	31.5334	24.5822	0.359264
3.6.4.12	EIE77805.1	Rd_01796	n.d.	±	0	n.d.	±	0	-	16.6614	12.8139	0.378791
3.6.4.12	EIE78189.1	Rd_01797	n.d.	±	0	n.d.	±	0	-	29.0782	18.9694	0.616264
3.6.4.12	EIE78426.1	Rd_01798	n.d.	±	0	n.d.	±	0	-	174.427	128.873	0.436668
3.6.4.12	EIE78771.1	Rd_01799	n.d.	±	0	n.d.	±	0	-	9.01994	6.97113	0.371724
3.6.4.12	EIE79647.1	Rd_01800	n.d.	±	0	n.d.	±	0	-	29.6445	27.1128	0.128793
3.6.4.12	EIE81129.1	Rd_01801	n.d.	±	0	n.d.	±	0	-	16.4517	12.1723	0.434632
3.6.4.12	EIE81197.1	Rd_01802	n.d.	±	0	n.d.	±	0	-	15.6056	14.7823	0.0781909
3.6.4.12	EIE81774.1	Rd_01803	n.d.	±	0	n.d.	±	0	-	19.613	14.9206	0.394509
3.6.4.12	EIE83140.1	Rd_01804	n.d.	±	0	n.d.	±	0	-	61.8932	50.1665	0.303056
3.6.4.12	EIE84272.1	Rd_01805	n.d.	±	0	n.d.	±	0	-	40.5107	31.6943	0.354078
3.6.4.12	EIE84942.1	Rd_01806	n.d.	±	0	n.d.	±	0	-	74.2099	66.6303	0.155434
3.6.4.12	EIE85442.1	Rd_01807	n.d.	±	0	n.d.	±	0	-	13.6074	11.9114	0.192051
3.6.4.12	EIE85988.1	Rd_01808	n.d.	±	0	n.d.	±	0	-	22.5179	21.7122	0.0525662
3.6.4.12	EIE86003.1	Rd_01809	n.d.	±	0	n.d.	±	0	-	14.2038	7.52492	0.916526
3.6.4.12	EIE86494.1	Rd_01810	n.d.	±	0	n.d.	±	0	-	53.5675	35.7683	0.582676
3.6.4.12	EIE86614.1	Rd_01811	n.d.	±	0	n.d.	±	0	-	36.3607	19.8428	0.873768
3.6.4.12	EIE86897.1	Rd_01812	n.d.	±	0	n.d.	±	0	-	63.0176	49.8259	0.33886
3.6.4.12	EIE87275.1	Rd_01813	n.d.	±	0	n.d.	±	0	-	52.4779	49.1219	0.095345
3.6.4.12	EIE87341.1	Rd_01814	n.d.	±	0	n.d.	±	0	-	49.2091	46.696	0.0756264
3.6.4.12	EIE87512.1	Rd_01815	n.d.	±	0	n.d.	±	0	-	19.9418	15.4033	0.37256
3.6.4.12	EIE87655.1	Rd_01816	n.d.	±	0	n.d.	±	0	-	26.8061	20.8301	0.363894
3.6.4.12	EIE88164.1	Rd_01817	n.d.	±	0	n.d.	±	0	-	31.1517	23.067	0.433478
3.6.4.12	EIE88285.1	Rd_01818	n.d.	±	0	n.d.	±	0	-	16.0923	13.2131	0.284405
3.6.4.12	EIE88321.1	Rd_01819	n.d.	±	0	n.d.	±	0	-	9.54272	4.2597	1.16365
3.6.4.12	EIE88980.1	Rd_01820	n.d.	±	0	n.d.	±	0	-	54.306	43.5685	0.317826
3.6.4.12	EIE89280.1	Rd_01821	n.d.	±	0	n.d.	±	0	-	66.6223	49.4758	0.429282
3.6.4.12	EIE89653.1	Rd_01822	n.d.	±	0	n.d.	±	0	-	32.028	28.5803	0.164317
3.6.4.12	EIE89791.1	Rd_01823	n.d.	±	0	n.d.	±	0	-	61.8756	51.9659	0.251805
3.6.4.12	EIE90035.1	Rd_01824	n.d.	±	0	n.d.	±	0	-	38.7207	26.8209	0.529746
3.6.4.12	EIE90848.1	Rd_01825	n.d.	±	0	n.d.	±	0	-	46.8427	31.1083	0.590524
3.6.4.12	EIE90943.1	Rd_01826	n.d.	±	0	n.d.	±	0	-	23.0308	19.1116	0.269116
3.6.4.12	EIE92468.1	Rd_01827	n.d.	±	0	n.d.	±	0	-	45.5006	36.2588	0.327554
3.6.4.13	contig-100_16_+0_max_po1	Rd_01828	n.d.	±	0	n.d.	±	0	-	-	-	-
3.6.4.13	contig-100_629_-2_max_po1	Rd_01829	0.00509254	±	0.00197019	0.0256484	±	0.00153791	-2.33241	86.3612	85.336	0.0172285
3.6.4.13	contig-100_3974_-2_max_po1	Rd_01830	0.00509254	±	0.00197019	0.0853536	±	0.00949532	-4.067	908.106	823.674	0.140787
3.6.4.13	EIE75488.1	Rd_01831	n.d.	±	0	n.d.	±	0	-	25.4715	28.7627	-0.175313
3.6.4.13	EIE76283.1	Rd_01832	n.d.	±	0	n.d.	±	0	-	21.4639	11.1732	0.941865
3.6.4.13	EIE76656.1	Rd_01833	n.d.	±	0	n.d.	±	0	-	47.1423	42.1479	0.161561
3.6.4.13	EIE76683.1	Rd_01834	n.d.	±	0	n.d.	±	0	-	35.2072	28.2842	0.315875
3.6.4.13	EIE77498.1	Rd_01835	n.d.	±	0	n.d.	±	0	-	62.8811	56.9771	0.142244
3.6.4.13	EIE77597.1	Rd_01836	0.013093	±	0.00552987	0.12887	±	0.00574157	-3.29905	937.213	843.324	0.152289
3.6.4.13	EIE77629.1	Rd_01837	n.d.	±	0	n.d.	±	0	-	30.6373	20.8093	0.558062
3.6.4.13	EIE78531.1	Rd_01838	n.d.	±	0	n.d.	±	0	-	7.85299	6.60796	0.249037
3.6.4.13	EIE78583.1	Rd_01839	n.d.	±	0	n.d.	±	0	-	28.177	20.8853	0.432029
3.6.4.13	EIE79142.1	Rd_01840	n.d.	±	0	n.d.	±	0	-	61.2755	28.3449	1.11222
3.6.4.13	EIE79252.1	Rd_01841	n.d.	±	0	n.d.	±	0	-	65.3081	45.9255	0.507968
3.6.4.13	EIE79315.1	Rd_01842	0.0102157	±	0.000702766	0.0189001	±	0.00764504	-0.887608	112.275	79.048	0.506238
3.6.4.13	EIE79563.1	Rd_01843	n.d.	±	0	n.d.	±	0	-	54.2828	42.7602	0.344224
3.6.4.13	EIE80019.1	Rd_01844	n.d.	±	0	n.d.	±	0	-	33.7363	24.3025	0.473195
3.6.4.13	EIE81014.1	Rd_01845	n.d.	±	0	n.d.	±	0	-	136.956	131.141	0.0625963
3.6.4.13	EIE81129.1	Rd_01846	n.d.	±	0	n.d.	±	0	-	16.4517	12.1723	0.434632
3.6.4.13	EIE81845.1	Rd_01847	n.d.	±	0	n.d.	±	0	-	45.196	35.0483	0.366849
3.6.4.13	EIE82122.1	Rd_01848	n.d.	±	0	n.d.	±	0	-	60.3068	198.909	-1.72172
3.6.4.13	EIE82811.1	Rd_01849	n.d.	±	0	n.d.	±	0	-	23.5561	21.8328	0.109601
3.6.4.13	EIE82813.1	Rd_01850	n.d.	±	0	n.d.	±	0	-	43.8106	48.8262	-0.156376
3.6.4.13	EIE82870.1	Rd_01851	n.d.	±	0	n.d.	±	0	-	93.7698	62.9848	0.574119
3.6.4.13	EIE83492.1	Rd_01852	n.d.	±	0	n.d.	±	0	-	85.2596	34.2053	1.31764
3.6.4.13	EIE83902.1	Rd_01853	n.d.	±	0	n.d.	±	0	-	101.478	71.0365	0.514531
3.6.4.13	EIE83927.1	Rd_01854	n.d.	±	0	n.d.	±	0	-	32.1081	17.9292	0.840631
3.6.4.13	EIE84002.1	Rd_01855	n.d.	±	0	n.d.	±	0	-	94.3813	97.6309	-0.0488364
3.6.4.13	EIE84214.1	Rd_01856	n.d.	±	0	n.d.	±	0	-	69.1198	38.4167	0.847364
3.6.4.13	EIE84295.1	Rd_01857	n.d.	±	0	n.d.	±	0	-	10.6524	7.96865	0.41877
3.6.4.13	EIE84435.1	Rd_01858	0.0102157	±	0.000702766	0.0189001	±	0.00764504	-0.887608	173.877	109.699	0.664517
3.6.4.13	EIE84865.1	Rd_01859	n.d.	±	0	n.d.	±	0	-	138.663	95.9995	0.530482
3.6.4.13	EIE85344.1	Rd_01860	n.d.	±	0	n.d.	±	0	-	38.5705	20.9541	0.880265
3.6.4.13	EIE85559.1	Rd_01861	n.d.	±	0	n.d.	±	0	-	104.48	114.424	-0.131171
3.6.4.13	EIE85576.1	Rd_01862	n.d.	±	0	n.d.	±	0	-	121.823	102.291	0.252104
3.6.4.13	EIE85631.1	Rd_01863	n.d.	±	0	n.d.	±	0	-	100.398	68.6411	0.548589
3.6.4.13	EIE85876.1	Rd_01864	n.d.	±	0	n.d.	±	0	-	23.4334	13.8348	0.760271
3.6.4.13	EIE85900.1	Rd_01865	n.d.	±	0	n.d.	±	0	-	30.7275	25.5952	0.26366
3.6.4.13	EIE87311.1	Rd_01866	n.d.	±	0	n.d.	±	0	-	42.7748	14.8521	1.5261
3.6.4.13	EIE88385.1	Rd_01867	n.d.	±	0	n.d.	±	0	-	98.8993	67.0733	0.560223
3.6.4.13	EIE88820.1	Rd_01868	n.d.	±	0	n.d.	±	0	-	12.3367	7.96013	0.632095
3.6.4.13	EIE89293.1	Rd_01869	n.d.	±	0	n.d.	±	0	-	4.24876	3.57275	0.250004
3.6.4.13	EIE89312.1	Rd_01870	n.d.	±	0	n.d.	±	0	-	30.6535	21.7975	0.491888
3.6.4.13	EIE89343.1	Rd_01871	n.d.	±	0	n.d.	±	0	-	66.0821	63.1888	0.0645903
3.6.4.13	EIE89387.1	Rd_01872	n.d.	±	0	n.d.	±	0	-	14.2451	9.33235	0.610157
3.6.4.13	EIE89674.1	Rd_01873	n.d.	±	0	n.d.	±	0	-	47.8426	32.0873	0.57629
3.6.4.13	EIE89729.1	Rd_01874	n.d.	±	0	n.d.	±	0	-	32.7588	24.8634	0.39786
3.6.4.13	EIE90789.1	Rd_01875	n.d.	±	0	n.d.	±	0	-	32.0201	20.9397	0.612734
3.6.4.13	EIE91029.1	Rd_01876	0.0102157	±	0.000702766	0.0189001	±	0.00764504	-0.887608	195.681	187.723	0.0598979
3.6.4.13	EIE91320.1	Rd_01877	n.d.	±	0	n.d.	±	0	-	14.3492	13.8388	0.0522505
3.6.4.13	EIE91325.1	Rd_01878	n.d.	±	0	n.d.	±	0	-	18.8024	14.8573	0.33974
3.6.4.13	EIE91455.1	Rd_01879	n.d.	±	0	n.d.	±	0	-	74.8958	46.1657	0.698064
1.5.1.2	contig-100_5946_-0_max_po1	Rd_01880	n.d.	±	0	n.d.	±	0	-	-	-	-
1.5.1.2	EIE79381.1	Rd_01881	n.d.	±	0	n.d.	±	0	-	8.37121	32.1487	-1.94125
1.5.1.2	EIE91614.1	Rd_01882	n.d.	±	0	n.d.	±	0	-	156.98	92.5922	0.761615
1.5.1.7	contig-100_2891_+0_max_po1	Rd_01883	0.0445944	±	0.00216891	0.0840632	±	0.00749983	-0.914613	250.412	465.609	-0.894814
1.5.1.7	EIE80515.1	Rd_01884	0.0738383	±	0.00118009	0.134983	±	0.00702184	-0.87034	295.547	560.523	-0.923385
1.13.11.54	contig-100_5302_-1_max_po1	Rd_01885	n.d.	±	0	n.d.	±	0	-	-	-	-
1.13.11.54	contig-100_8886_+1_max_po1	Rd_01886	0	±	0	0.012432	±	0.00315893	-100	268.274	246.448	0.122423
1.13.11.54	EIE76028.1	Rd_01887	0	±	0	0.015392	±	0.00390221	-100	289.285	262.374	0.140865
1.13.11.5	contig-100_1078_-0_max_po1	Rd_01888	0.0845573	±	0.0126925	0	±	0	100	181.009	106.933	0.75935
1.13.11.5	EIE88763.1	Rd_01889	0.118928	±	0.0135613	0	±	0	100	276.291	143.067	0.949495
1.13.11.6	contig-100_9029_+0_max_po1	Rd_01890	0.0243396	±	0.00205342	0.0273202	±	0.0068951	-0.166662	492.699	918.927	-0.899243
1.13.11.6	EIE88155.1	Rd_01891	0.0359141	±	0.0036216	0.0559309	±	0.0116644	-0.639093	429.569	827.879	-0.946531
2.1.1.98	contig-100_1138_+0_max_po1	Rd_01892	0.00457796	±	0.000312121	0	±	0	100	129.089	109.161	0.2419
2.1.1.98	EIE78111.1	Rd_01893	0.00420871	±	0.00234394	0	±	0	100	104.08	73.3614	0.504596
3.4.11.9	contig-100_1598_-1_max_po2	Rd_01894	n.d.	±	0	n.d.	±	0	-	-	-	-
3.4.11.9	contig-100_1812_+0_max_po1	Rd_01895	0.292113	±	0.0265961	0.239296	±	0.0132918	0.287731	227.191	72.7229	1.64342
3.4.11.9	contig-100_3299_+1_max_po1	Rd_01896	0.00978607	±	0.00141142	0.00491696	±	0.00180268	0.992961	151.383	125.519	0.270305
3.4.11.9	contig-100_3500_+0_max_po1	Rd_01897	0	±	0	0.0107829	±	0.00316347	-100	28.0109	78.143	-1.48013
3.4.11.9	EIE80148.1	Rd_01898	0.0147554	±	0.00107891	0.00714594	±	0.00261608	1.04605	152.349	124.393	0.29247
3.4.11.9	EIE80604.1	Rd_01899	n.d.	±	0	n.d.	±	0	-	135.758	142.17	-0.0665811
3.4.11.9	EIE81273.1	Rd_01900	n.d.	±	0	n.d.	±	0	-	75.6818	21.9584	1.78517
3.4.11.9	EIE83834.1	Rd_01901	0.362029	±	0.034677	0.252002	±	0.0127124	0.522672	222.661	70.5981	1.65715
3.4.11.9	EIE84282.1	Rd_01902	0	±	0	0.0174648	±	0.00108111	-100	28.5737	78.3136	-1.45458
3.4.11.9	EIE91749.1	Rd_01903	n.d.	±	0	n.d.	±	0	-	27.0089	23.4123	0.206167
3.4.11.1	contig-100_2487_+2_max_po1	Rd_01904	0	±	0	0.00736575	±	0.00383292	-100	62.225	66.3224	-0.0920024
3.4.11.1	EIE81986.1	Rd_01905	n.d.	±	0	n.d.	±	0	-	63.9974	67.8446	-0.0842209
3.4.11.1	EIE90644.1	Rd_01906	n.d.	±	0	n.d.	±	0	-	45.3144	37.6328	0.267976
2.7.1.23	contig-100_670_-1_max_po1	Rd_01907	n.d.	±	0	n.d.	±	0	-	-	-	-
2.7.1.23	EIE81539.1	Rd_01908	n.d.	±	0	n.d.	±	0	-	104.567	77.9132	0.424482
2.7.1.23	EIE90329.1	Rd_01909	n.d.	±	0	n.d.	±	0	-	34	81.1521	-1.25509
2.7.1.23	EIE91283.1	Rd_01910	n.d.	±	0	n.d.	±	0	-	57.995	42.6437	0.443594
2.5.1.60	contig-100_2574_+1_max_po1	Rd_01911	n.d.	±	0	n.d.	±	0	-	-	-	-
2.5.1.60	EIE82261.1	Rd_01912	n.d.	±	0	n.d.	±	0	-	76.2809	48.1911	0.662556
2.7.7.4	contig-100_1928_+2_max_po1	Rd_01913	0	±	0	0.00861115	±	0.00597998	-100	21.4017	56.7981	-1.40811
2.7.7.4	EIE79594.1	Rd_01914	0	±	0	0.00992865	±	0.00317325	-100	21.1913	56.6423	-1.41841
2.7.1.48	contig-100_471_-2_max_po1	Rd_01915	n.d.	±	0	n.d.	±	0	-	-	-	-
2.7.1.48	EIE88034.1	Rd_01916	n.d.	±	0	n.d.	±	0	-	78.6705	90.3871	-0.200295
2.7.1.48	EIE88613.1	Rd_01917	n.d.	±	0	n.d.	±	0	-	11.5827	5.7994	0.997991
2.7.1.40	contig-100_2097_-2_max_po1	Rd_01918	0	±	0	0.00302704	±	0.000787769	-100	14.7534	85.7657	-2.53935
2.7.1.40	contig-100_2331_-1_max_po1	Rd_01919	0.0256556	±	0.00553103	0.00302704	±	0.000787769	3.0833	128.218	63.0133	1.02487
2.7.1.40	EIE81527.1	Rd_01920	n.d.	±	0	n.d.	±	0	-	15.2675	90.8087	-2.57237
2.7.1.40	EIE83315.1	Rd_01921	5.02881	±	0.371339	5.8554	±	0.671658	-0.219551	1471.54	3334.67	-1.18022
2.7.1.40	EIE83785.1	Rd_01922	0.0358263	±	0.0073503	0.00769461	±	0.00115455	2.2191	131.88	63.4432	1.05569
2.7.1.40	EIE87176.1	Rd_01923	0.366969	±	0.0252766	0.216301	±	0.0314065	0.762616	910.439	514.042	0.824677
4.1.1.33	contig-100_4331_+2_max_po1	Rd_01924	0.0162885	±	0.00247206	0.0225543	±	0.000652285	-0.469553	82.7854	72.8423	0.184599
4.1.1.33	EIE86507.1	Rd_01925	0.0167701	±	0.00154857	0.0355872	±	0.000156812	-1.08547	85.8846	73.3927	0.226763
2.1.1.225	contig-100_2868_-2_max_po1	Rd_01926	n.d.	±	0	n.d.	±	0	-	-	-	-
4.1.1.37	contig-100_4332_-0_max_po1	Rd_01927	0.0238782	±	0.000315016	0.0169192	±	0.00453889	0.497039	71.5366	56.9102	0.329996
4.1.1.37	EIE90031.1	Rd_01928	0.038988	±	0.00376653	0.0309733	±	0.00192837	0.332005	73.8607	59.1717	0.319898
4.1.1.35	contig-100_4264_-1_max_po1	Rd_01929	0.0113458	±	0.000301238	0	±	0	100	235.933	200.914	0.2318
4.1.1.35	EIE83789.1	Rd_01930	0.012916	±	0.000147461	0	±	0	100	72.7651	47.7263	0.608462
4.1.1.35	EIE90340.1	Rd_01931	0.012916	±	0.000147461	0	±	0	100	248.503	207.755	0.258383
2.7.1.24	contig-100_6794_+2_max_po1	Rd_01932	n.d.	±	0	n.d.	±	0	-	-	-	-
2.7.1.24	EIE89929.1	Rd_01933	n.d.	±	0	n.d.	±	0	-	105.321	83.8011	0.32975
3.4.22.40	contig-100_2767_+1_max_po1	Rd_01934	0.437366	±	0.0308235	0.475557	±	0.0815907	-0.120775	5172.51	3004.46	0.78376
3.4.22.40	EIE83493.1	Rd_01935	0.585239	±	0.033756	0.538506	±	0.0398555	0.120065	5178.96	3002.66	0.786421
2.1.2.10	contig-100_706_+1_max_po1	Rd_01936	n.d.	±	0	n.d.	±	0	-	-	-	-
2.1.2.11	contig-100_5038_-2_max_po1	Rd_01937	n.d.	±	0	n.d.	±	0	-	-	-	-
3.4.11.18	contig-100_4063_+0_max_po1	Rd_01938	n.d.	±	0	n.d.	±	0	-	-	-	-
3.4.11.18	contig-100_4501_+1_max_po1	Rd_01939	0	±	0	0.00495189	±	0.00104047	-100	109.128	118.871	-0.123371
3.4.11.18	EIE79148.1	Rd_01940	n.d.	±	0	n.d.	±	0	-	130.974	112.124	0.224176
3.4.11.18	EIE86747.1	Rd_01941	0	±	0	0.0153294	±	0.00201081	-100	122.393	125.61	-0.0374327
2.4.1.1	contig-100_734_-2_max_po1	Rd_01942	0.00226584	±	0.000734697	0.0375653	±	0.00838875	-4.05128	19.794	151.929	-2.94026
2.4.1.1	contig-100_4357_-0_max_po1	Rd_01943	0	±	0	0.00228907	±	0.000187518	-100	9.90496	17.7257	-0.839623
2.4.1.1	EIE80018.1	Rd_01944	0	±	0	0.00187388	±	0.000854943	-100	5.06064	10.2336	-1.01592
2.4.1.1	EIE81983.1	Rd_01945	0.00330516	±	0.00108282	0.0366478	±	0.000456442	-3.47094	13.6082	128.858	-3.24324
2.1.1.205	contig-100_6459_+1_max_po1	Rd_01946	n.d.	±	0	n.d.	±	0	-	-	-	-
2.1.1.205	EIE80373.1	Rd_01947	n.d.	±	0	n.d.	±	0	-	85.9737	81.6852	0.0738201
2.1.1.201	contig-100_390_+2_max_po1	Rd_01948	n.d.	±	0	n.d.	±	0	-	-	-	-
2.1.1.201	EIE82663.1	Rd_01949	n.d.	±	0	n.d.	±	0	-	58.4718	51.0147	0.19683
2.1.1.201	EIE88698.1	Rd_01950	n.d.	±	0	n.d.	±	0	-	81.0548	88.1466	-0.121007
2.3.1.88	contig-100_1753_-0_max_po1	Rd_01951	n.d.	±	0	n.d.	±	0	-	-	-	-
2.3.1.88	EIE76483.1	Rd_01952	n.d.	±	0	n.d.	±	0	-	174.587	149.13	0.22737
2.3.1.88	EIE79187.1	Rd_01953	n.d.	±	0	n.d.	±	0	-	171.61	144.103	0.252033
2.3.1.86	contig-100_2_-1_max_po1	Rd_01954	0.0532545	±	0.00537616	0.10982	±	0.00839825	-1.04416	110.402	196.888	-0.834611
2.3.1.86	EIE91460.1	Rd_01955	0.084381	±	0.0112705	0.132325	±	0.0124511	-0.649092	43.2619	68.9614	-0.672692
1.1.1.1	contig-100_4516_+2_max_po1	Rd_01956	0.0779504	±	0.010776	0.0645134	±	0.00409816	0.272958	201.054	135.838	0.5657
1.1.1.1	EIE90038.1	Rd_01957	n.d.	±	0	n.d.	±	0	-	6.46545	4.15428	0.638153
1.1.1.3	contig-100_3999_-1_max_po1	Rd_01958	0.237939	±	0.0223939	0.263647	±	0.00994395	-0.148016	272.146	293.023	-0.106634
1.1.1.3	contig-100_4465_+2_max_po1	Rd_01959	0.0133666	±	0.00113845	0.00939925	±	0.00143509	0.50801	41.0655	38.9632	0.0758142
1.1.1.3	EIE86771.1	Rd_01960	0.280555	±	0.0406184	0.308071	±	0.010479	-0.134977	298.89	321.02	-0.103049
1.1.1.8	contig-100_1387_+0_max_po1	Rd_01961	n.d.	±	0	n.d.	±	0	-	-	-	-
1.1.1.8	EIE79327.1	Rd_01962	n.d.	±	0	n.d.	±	0	-	144.189	231.301	-0.681815
1.1.1.8	EIE85071.1	Rd_01963	n.d.	±	0	n.d.	±	0	-	443.798	213.165	1.05794
1.1.1.8	EIE89079.1	Rd_01964	n.d.	±	0	n.d.	±	0	-	9.11255	0.471339	4.27302
1.1.1.8	EIE91044.1	Rd_01965	n.d.	±	0	n.d.	±	0	-	46.2078	16.6722	1.47069
1.1.1.9	contig-100_4470_+1_max_po1	Rd_01966	n.d.	±	0	n.d.	±	0	-	-	-	-
3.1.1.89	contig-100_5219_-1_max_po1	Rd_01967	n.d.	±	0	n.d.	±	0	-	-	-	-
4.2.99.18	contig-100_3773_-1_max_po1	Rd_01968	n.d.	±	0	n.d.	±	0	-	-	-	-
4.2.99.18	EIE81807.1	Rd_01969	n.d.	±	0	n.d.	±	0	-	93.5335	57.7089	0.696689
4.2.99.18	EIE87620.1	Rd_01970	n.d.	±	0	n.d.	±	0	-	42.1527	78.9528	-0.905366
3.1.22.4	-		-	±	0	-	±	-	-	-	-	-
3.1.22.4	-		-	±	0	-	±	-	-	-	-	-
3.4.22.65	-		-	±	0	-	±	-	-	-	-	-
3.4.22.65	-		-	±	0	-	±	-	-	-	-	-
3.1.22.1	-		-	±	0	-	±	-	-	-	-	-
3.1.22.1	-		-	±	0	-	±	-	-	-	-	-
3.4.11.20	-		-	±	0	-	±	-	-	-	-	-
3.4.11.20	-		-	±	0	-	±	-	-	-	-	-
3.2.1.45	-		-	±	0	-	±	-	-	-	-	-
3.2.1.45	-		-	±	0	-	±	-	-	-	-	-
1.1.1.146	-		-	±	0	-	±	-	-	-	-	-
1.1.1.146	-		-	±	0	-	±	-	-	-	-	-
3.4.11.22	-		-	±	0	-	±	-	-	-	-	-
3.4.11.22	-		-	±	0	-	±	-	-	-	-	-
4.6.1.14	-		-	±	0	-	±	-	-	-	-	-
4.6.1.14	-		-	±	0	-	±	-	-	-	-	-
4.6.1.15	-		-	±	0	-	±	-	-	-	-	-
4.6.1.15	-		-	±	0	-	±	-	-	-	-	-
3.4.11.23	-		-	±	0	-	±	-	-	-	-	-
3.4.11.23	-		-	±	0	-	±	-	-	-	-	-
4.6.1.12	-		-	±	0	-	±	-	-	-	-	-
4.6.1.12	-		-	±	0	-	±	-	-	-	-	-
4.6.1.13	-		-	±	0	-	±	-	-	-	-	-
4.6.1.13	-		-	±	0	-	±	-	-	-	-	-
3.2.1.49	-		-	±	0	-	±	-	-	-	-	-
3.2.1.49	-		-	±	0	-	±	-	-	-	-	-
1.5.3.7	-		-	±	0	-	±	-	-	-	-	-
1.5.3.7	-		-	±	0	-	±	-	-	-	-	-
[truncated: 5,821 more rows]
