# Supplementary material for: Comparative proteomics of Rhizopus delemar ATCC 20344 unravels the role of amino acid catabolism in fumarate accumulation
Source: PeerJ. 2017 Mar 30;5:e3133. doi: 10.7717/peerj.3133 (PMC5376114; doi:10.7717/peerj.3133)
Supplement: Table S5 — Metabolic pathway coverage and hypergeometric test results of proteins found in the R. delemar ATCC 20344 and R. delemar RA 99-880 in silico and snapshot proteomes. [file peerj-05-3133-s005.xlsx]

## Sheet: Sheet1
Pathway	KEGG pathway map	#ECs in pathway	In silico proteomes						In vivo proteomics (snapshot proteomes)						ATCC 20344 & RA 99-880 combined
			ATCC 20344 (transcriptomics)			RA 99-880			ATCC 20344			RA 99-880			In silico proteomes		In vivo proteomics (snapshot proteomes)		Differentially expressed	overexpressed (aerobic)
			#ECs covered	Ratio	EC numbers	#ECs covered	Ratio	EC numbers	#ECs covered	Ratio	EC numbers	#ECs covered	Ratio	EC numbers	#ECs covered	Ratio (KEGG)	#ECs covered	Ratio (proteome)	1.5-fold	1.5-fold	2-fold
Alanine, aspartate and glutamate metabolism	path:map00250	50	12	0.24	2.1.3.2;2.6.1.1;2.6.1.16;2.6.1.19;2.6.1.2;4.1.1.15;4.3.2.1;4.3.2.2;6.3.1.2;6.3.4.4;6.3.5.4;6.3.5.5	15	0.3	1.4.1.3;2.1.3.2;2.4.2.14;2.6.1.1;2.6.1.16;2.6.1.19;2.6.1.2;4.1.1.15;4.3.2.1;4.3.2.2;6.3.1.2;6.3.4.4;6.3.4.5;6.3.5.4;6.3.5.5	9	0.18	2.1.3.2;2.6.1.1;2.6.1.19;4.1.1.15;4.3.2.1;4.3.2.2;6.3.1.2;6.3.4.4;6.3.5.4	12	0.24	2.1.3.2;2.6.1.1;2.6.1.16;2.6.1.19;4.1.1.15;4.3.2.1;4.3.2.2;6.3.1.2;6.3.4.4;6.3.4.5;6.3.5.4;6.3.5.5	15	0.3	12	0.8	0.0400934	0.101976	0.264235
alpha-Linolenic acid metabolism	path:map00592	17	4	0.235294	1.1.1.1;1.3.3.6;2.3.1.16;4.2.1.17	4	0.235294	1.1.1.1;1.3.3.6;2.3.1.16;4.2.1.17	2	0.117647	1.1.1.1;4.2.1.17	2	0.117647	2.3.1.16;4.2.1.17	4	0.235294	3	0.75	0.980729	0.826291	0.708513
Amino sugar and nucleotide sugar metabolism	path:map00520	118	23	0.194915	1.1.1.22;1.1.1.271;1.6.2.2;2.3.1.4;2.4.1.16;2.5.1.7;2.6.1.16;2.7.1.1;2.7.1.6;2.7.7.12;2.7.7.13;2.7.7.23;2.7.7.9;3.2.1.14;3.5.1.41;3.5.99.6;4.1.1.35;4.2.1.47;5.1.3.2;5.3.1.8;5.3.1.9;5.4.2.2;5.4.2.8	26	0.220339	1.1.1.22;1.1.1.271;1.6.2.2;2.3.1.4;2.4.1.16;2.5.1.7;2.6.1.16;2.7.1.1;2.7.1.6;2.7.7.12;2.7.7.13;2.7.7.23;2.7.7.9;3.2.1.14;3.2.1.52;3.5.1.25;3.5.1.41;3.5.99.6;4.1.1.35;4.2.1.47;5.1.3.2;5.3.1.8;5.3.1.9;5.4.2.2;5.4.2.3;5.4.2.8	15	0.127119	1.1.1.22;1.1.1.271;1.6.2.2;2.3.1.4;2.4.1.16;2.7.7.23;2.7.7.9;3.5.1.41;3.5.99.6;4.1.1.35;4.2.1.47;5.3.1.8;5.3.1.9;5.4.2.2;5.4.2.8	19	0.161017	1.1.1.22;1.1.1.271;1.6.2.2;2.3.1.4;2.4.1.16;2.6.1.16;2.7.1.1;2.7.7.23;2.7.7.9;3.5.1.41;3.5.99.6;4.1.1.35;4.2.1.47;5.1.3.2;5.3.1.8;5.3.1.9;5.4.2.2;5.4.2.3;5.4.2.8	26	0.220339	19	0.730769	0.983048	0.795061	0.776957
Aminoacyl-tRNA biosynthesis	path:map00970	31	20	0.645161	6.1.1.1;6.1.1.10;6.1.1.11;6.1.1.12;6.1.1.14;6.1.1.15;6.1.1.16;6.1.1.17;6.1.1.18;6.1.1.19;6.1.1.2;6.1.1.20;6.1.1.21;6.1.1.22;6.1.1.3;6.1.1.4;6.1.1.5;6.1.1.6;6.1.1.7;6.1.1.9	20	0.645161	6.1.1.1;6.1.1.10;6.1.1.11;6.1.1.12;6.1.1.14;6.1.1.15;6.1.1.16;6.1.1.17;6.1.1.18;6.1.1.19;6.1.1.2;6.1.1.20;6.1.1.21;6.1.1.22;6.1.1.3;6.1.1.4;6.1.1.5;6.1.1.6;6.1.1.7;6.1.1.9	6	0.193548	6.1.1.15;6.1.1.19;6.1.1.22;6.1.1.6;6.1.1.7;6.1.1.9	7	0.225806	6.1.1.15;6.1.1.16;6.1.1.19;6.1.1.22;6.1.1.6;6.1.1.7;6.1.1.9	20	0.645161	7	0.35	0.392034	0.370153	0.174207
Aminobenzoate degradation	path:map00627	62	2	0.0322581	3.1.3.2;4.2.1.17	2	0.0322581	3.1.3.2;4.2.1.17	1	0.016129	4.2.1.17	1	0.016129	4.2.1.17	2	0.0322581	1	0.5	1	1	1
Arachidonic acid metabolism	path:map00590	31	1	0.0322581	3.3.2.6	1	0.0322581	3.3.2.6	1	0.0322581	3.3.2.6	1	0.0322581	3.3.2.6	1	0.0322581	1	1	0.531078	0.193088	0.111913
Arginine and proline metabolism	path:map00330	85	10	0.117647	1.2.1.3;1.2.1.41;1.5.1.2;2.5.1.16;2.6.1.1;2.6.1.13;2.7.2.11;3.5.3.11;4.1.1.17;4.1.1.50	11	0.129412	1.2.1.3;1.2.1.41;1.5.1.2;2.5.1.16;2.6.1.1;2.6.1.13;2.7.2.11;3.5.3.1;3.5.3.11;4.1.1.17;4.1.1.50	6	0.0705882	1.2.1.3;1.2.1.41;2.5.1.16;2.6.1.1;2.6.1.13;3.5.3.11	7	0.0823529	1.2.1.3;1.2.1.41;2.5.1.16;2.6.1.1;2.6.1.13;3.5.3.1;3.5.3.11	11	0.129412	7	0.636364	0.656372	0.152637	0.5362
Arginine biosynthesis	path:map00220	32	11	0.34375	1.2.1.38;2.1.3.3;2.3.1.1;2.3.1.35;2.6.1.1;2.6.1.11;2.6.1.2;2.7.2.8;3.5.1.5;4.3.2.1;6.3.1.2	14	0.4375	1.2.1.38;1.4.1.3;2.1.3.3;2.3.1.1;2.3.1.35;2.6.1.1;2.6.1.11;2.6.1.2;2.7.2.8;3.5.1.5;3.5.3.1;4.3.2.1;6.3.1.2;6.3.4.5	10	0.3125	1.2.1.38;2.1.3.3;2.3.1.1;2.3.1.35;2.6.1.1;2.6.1.11;2.7.2.8;3.5.1.5;4.3.2.1;6.3.1.2	12	0.375	1.2.1.38;2.1.3.3;2.3.1.1;2.3.1.35;2.6.1.1;2.6.1.11;2.7.2.8;3.5.1.5;3.5.3.1;4.3.2.1;6.3.1.2;6.3.4.5	14	0.4375	12	0.857143	0.0694552	0.032773	0.534394
Ascorbate and aldarate metabolism	path:map00053	47	3	0.0638298	1.1.1.22;1.2.1.3;1.8.5.1	4	0.0851064	1.1.1.22;1.13.99.1;1.2.1.3;1.8.5.1	2	0.0425532	1.1.1.22;1.2.1.3	2	0.0425532	1.1.1.22;1.2.1.3	4	0.0851064	2	0.5	0.280517	0.227247	0.11164
Atrazine degradation	path:map00791	12	1	0.0833333	3.5.1.5	1	0.0833333	3.5.1.5	1	0.0833333	3.5.1.5	1	0.0833333	3.5.1.5	1	0.0833333	1	1	0.729242	0.440433	0.33574
Benzoate degradation	path:map00362	71	4	0.056338	1.3.8.6;2.3.1.16;2.3.1.9;4.2.1.17	4	0.056338	1.3.8.6;2.3.1.16;2.3.1.9;4.2.1.17	3	0.0422535	1.3.8.6;2.3.1.9;4.2.1.17	4	0.056338	1.3.8.6;2.3.1.16;2.3.1.9;4.2.1.17	4	0.056338	4	1	0.979949	0.9467	0.873043
beta-Alanine metabolism	path:map00410	37	8	0.216216	1.2.1.18;1.2.1.3;2.5.1.16;2.6.1.19;3.1.2.4;4.1.1.15;4.2.1.17;6.3.2.1	8	0.216216	1.2.1.18;1.2.1.3;1.3.8.7;2.5.1.16;2.6.1.19;3.1.2.4;4.1.1.15;4.2.1.17	8	0.216216	1.2.1.18;1.2.1.3;2.5.1.16;2.6.1.19;3.1.2.4;4.1.1.15;4.2.1.17;6.3.2.1	7	0.189189	1.2.1.18;1.2.1.3;2.5.1.16;2.6.1.19;3.1.2.4;4.1.1.15;4.2.1.17	9	0.243243	8	0.888889	0.38906	0.0111529	0.00117544
Biosynthesis of ansamycins	path:map01051	8	1	0.125	2.2.1.1	1	0.125	2.2.1.1	1	0.125	2.2.1.1	1	0.125	2.2.1.1	1	0.125	1	1	0.927405	1	1
Biosynthesis of unsaturated fatty acids	path:map01040	15	8	0.533333	1.1.1.100;1.14.19.1;1.3.1.38;1.3.3.6;2.3.1.16;2.3.1.199;4.2.1.134;4.2.1.17	7	0.466667	1.1.1.100;1.14.19.1;1.3.1.38;1.3.3.6;2.3.1.16;2.3.1.199;4.2.1.17	4	0.266667	1.1.1.100;1.3.1.38;2.3.1.199;4.2.1.17	5	0.333333	1.1.1.100;1.3.1.38;2.3.1.16;2.3.1.199;4.2.1.17	8	0.533333	5	0.625	0.87535	0.731381	0.545071
Biotin metabolism	path:map00780	20	6	0.3	1.1.1.100;2.3.1.41;2.8.1.6;4.2.1.59;6.3.3.3;6.3.4.15	5	0.25	1.1.1.100;2.3.1.41;2.8.1.6;4.2.1.59;6.3.4.15	4	0.2	1.1.1.100;2.3.1.41;4.2.1.59;6.3.3.3	3	0.15	1.1.1.100;2.3.1.41;4.2.1.59	6	0.3	4	0.666667	0.927405	1	1
Butanoate metabolism	path:map00650	58	8	0.137931	1.3.5.1;2.2.1.6;2.3.1.9;2.3.3.10;2.6.1.19;4.1.1.15;4.1.3.4;4.2.1.17	8	0.137931	1.3.5.1;2.2.1.6;2.3.1.9;2.3.3.10;2.6.1.19;4.1.1.15;4.1.3.4;4.2.1.17	6	0.103448	1.3.5.1;2.3.1.9;2.3.3.10;2.6.1.19;4.1.1.15;4.2.1.17	6	0.103448	1.3.5.1;2.3.1.9;2.3.3.10;2.6.1.19;4.1.1.15;4.2.1.17	8	0.137931	6	0.75	0.626748	0.501009	0.261124
Butirosin and neomycin biosynthesis	path:map00524	26	1	0.0384615	2.7.1.1	1	0.0384615	2.7.1.1	-	-	-	1	0.0384615	2.7.1.1	1	0.0384615	-	-	-	-	-
C5-Branched dibasic acid metabolism	path:map00660	22	2	0.0909091	1.1.1.85;2.2.1.6	3	0.136364	1.1.1.85;2.2.1.6;6.2.1.5	1	0.0454545	1.1.1.85	2	0.0909091	1.1.1.85;6.2.1.5	3	0.136364	2	0.666667	0.927405	0.687778	0.559567
Caffeine metabolism	path:map00232	14	1	0.0714286	1.7.3.3	1	0.0714286	1.7.3.3	1	0.0714286	1.7.3.3	1	0.0714286	1.7.3.3	1	0.0714286	1	1	0.729242	0.440433	0.33574
Caprolactam degradation	path:map00930	21	1	0.047619	4.2.1.17	1	0.047619	4.2.1.17	1	0.047619	4.2.1.17	1	0.047619	4.2.1.17	1	0.047619	1	1	1	1	1
Carbapenem biosynthesis	path:map00332	12	2	0.166667	1.2.1.41;2.7.2.11	2	0.166667	1.2.1.41;2.7.2.11	1	0.0833333	1.2.1.41	1	0.0833333	1.2.1.41	2	0.166667	1	0.5	1	1	1
Carbon fixation in photosynthetic organisms	path:map00710	25	11	0.44	1.1.1.37;1.2.1.12;2.2.1.1;2.6.1.1;2.6.1.2;2.7.2.3;4.1.1.49;4.1.2.13;5.1.3.1;5.3.1.1;5.3.1.6	12	0.48	1.1.1.37;1.2.1.12;2.2.1.1;2.6.1.1;2.6.1.2;2.7.2.3;3.1.3.11;4.1.1.49;4.1.2.13;5.1.3.1;5.3.1.1;5.3.1.6	9	0.36	1.1.1.37;1.2.1.12;2.2.1.1;2.6.1.1;2.7.2.3;4.1.1.49;4.1.2.13;5.3.1.1;5.3.1.6	9	0.36	1.1.1.37;1.2.1.12;2.2.1.1;2.6.1.1;2.7.2.3;4.1.1.49;4.1.2.13;5.3.1.1;5.3.1.6	12	0.48	9	0.75	0.85404	0.639516	0.90391
Carbon fixation pathways in prokaryotes	path:map00720	54	15	0.277778	1.1.1.37;1.1.1.42;1.3.5.1;1.5.1.20;1.5.1.5;2.3.1.9;2.3.3.8;3.5.4.9;4.2.1.17;4.2.1.2;4.2.1.3;6.2.1.1;6.3.4.3;6.4.1.1;6.4.1.3	17	0.314815	1.1.1.37;1.1.1.42;1.3.5.1;1.5.1.20;1.5.1.5;2.3.1.9;2.3.3.8;3.5.4.9;4.2.1.17;4.2.1.2;4.2.1.3;6.2.1.1;6.2.1.5;6.3.4.3;6.4.1.1;6.4.1.2;6.4.1.3	10	0.185185	1.1.1.37;1.1.1.42;1.3.5.1;1.5.1.20;2.3.1.9;2.3.3.8;4.2.1.17;4.2.1.2;6.2.1.1;6.4.1.1	13	0.240741	1.1.1.37;1.1.1.42;1.3.5.1;1.5.1.20;2.3.1.9;2.3.3.8;4.2.1.17;4.2.1.2;4.2.1.3;6.2.1.1;6.2.1.5;6.4.1.1;6.4.1.2	17	0.314815	13	0.764706	0.681194	0.820556	0.75137
Chloroalkane and chloroalkene degradation	path:map00625	22	2	0.0909091	1.1.1.1;1.2.1.3	2	0.0909091	1.1.1.1;1.2.1.3	2	0.0909091	1.1.1.1;1.2.1.3	1	0.0454545	1.2.1.3	2	0.0909091	2	1	0.703406	0.227247	0.11164
Citrate cycle (TCA cycle)	path:map00020	25	14	0.56	1.1.1.37;1.1.1.42;1.2.4.1;1.2.4.2;1.3.5.1;1.8.1.4;2.3.1.12;2.3.1.61;2.3.3.1;2.3.3.8;4.1.1.49;4.2.1.2;4.2.1.3;6.4.1.1	16	0.64	1.1.1.37;1.1.1.41;1.1.1.42;1.2.4.1;1.2.4.2;1.3.5.1;1.8.1.4;2.3.1.12;2.3.1.61;2.3.3.1;2.3.3.8;4.1.1.49;4.2.1.2;4.2.1.3;6.2.1.5;6.4.1.1	12	0.48	1.1.1.37;1.1.1.42;1.2.4.1;1.2.4.2;1.3.5.1;1.8.1.4;2.3.1.12;2.3.3.1;2.3.3.8;4.1.1.49;4.2.1.2;6.4.1.1	15	0.6	1.1.1.37;1.1.1.41;1.1.1.42;1.2.4.1;1.2.4.2;1.3.5.1;1.8.1.4;2.3.1.12;2.3.3.1;2.3.3.8;4.1.1.49;4.2.1.2;4.2.1.3;6.2.1.5;6.4.1.1	16	0.64	15	0.9375	0.588706	0.292432	0.143258
Cutin, Suberine and wax biosynthesis	path:map00073	9	1	0.111111	2.3.1.20	1	0.111111	2.3.1.20	-	-	-	-	-	-	1	0.111111	-	-	-	-	-
Cyanoamino acid metabolism	path:map00460	27	2	0.0740741	2.1.2.1;2.3.2.2	3	0.111111	2.1.2.1;2.3.2.2;3.2.1.21	2	0.0740741	2.1.2.1;2.3.2.2	2	0.0740741	2.1.2.1;2.3.2.2	3	0.111111	2	0.666667	0.703406	0.594256	0.411708
Cysteine and methionine metabolism	path:map00270	77	27	0.350649	1.1.1.27;1.1.1.3;1.1.1.37;1.13.11.54;1.2.1.11;2.1.1.10;2.1.1.13;2.1.1.14;2.3.1.31;2.4.2.28;2.5.1.16;2.5.1.47;2.5.1.48;2.5.1.49;2.5.1.6;2.6.1.1;2.6.1.42;2.7.2.4;3.1.3.77;3.3.1.1;4.1.1.50;4.2.1.109;4.2.1.22;4.3.1.17;4.4.1.8;5.3.1.23;6.3.2.2	27	0.350649	1.1.1.27;1.1.1.3;1.1.1.37;1.13.11.20;1.13.11.54;1.2.1.11;2.1.1.13;2.1.1.14;2.3.1.31;2.4.2.28;2.5.1.16;2.5.1.47;2.5.1.48;2.5.1.49;2.5.1.6;2.6.1.1;2.6.1.42;2.7.2.4;3.1.3.77;3.3.1.1;4.1.1.50;4.2.1.109;4.2.1.22;4.3.1.17;4.4.1.8;5.3.1.23;6.3.2.2	15	0.194805	1.1.1.3;1.1.1.37;1.13.11.54;1.2.1.11;2.4.2.28;2.5.1.16;2.5.1.47;2.5.1.6;2.6.1.1;2.6.1.42;3.1.3.77;3.3.1.1;4.2.1.22;4.3.1.17;6.3.2.2	16	0.207792	1.1.1.3;1.1.1.37;1.13.11.54;1.2.1.11;2.1.1.14;2.4.2.28;2.5.1.16;2.5.1.47;2.5.1.6;2.6.1.1;2.6.1.42;3.1.3.77;3.3.1.1;4.2.1.22;4.3.1.17;6.3.2.2	28	0.363636	16	0.571429	0.531543	0.860218	0.719021
Drug metabolism - cytochrome P450	path:map00982	10	2	0.2	1.1.1.1;2.5.1.18	2	0.2	1.1.1.1;2.5.1.18	2	0.2	1.1.1.1;2.5.1.18	-	-	-	2	0.2	2	1	0.927405	1	1
Drug metabolism - other enzymes	path:map00983	21	7	0.333333	1.1.1.205;2.4.2.10;2.4.2.8;2.7.1.48;3.5.4.5;3.6.1.19;6.3.5.2	6	0.285714	1.1.1.205;2.4.2.10;2.7.1.48;3.5.4.5;3.6.1.19;6.3.5.2	4	0.190476	1.1.1.205;2.4.2.8;3.5.4.5;6.3.5.2	3	0.142857	1.1.1.205;3.5.4.5;6.3.5.2	7	0.333333	4	0.571429	0.280517	0.0365933	0.11164
Ether lipid metabolism	path:map00565	27	2	0.0740741	3.1.3.4;3.1.4.4	2	0.0740741	3.1.3.4;3.1.4.4	1	0.037037	3.1.4.4	2	0.0740741	3.1.3.4;3.1.4.4	2	0.0740741	2	1	0.927405	0.687778	0.559567
Ethylbenzene degradation	path:map00642	10	1	0.1	2.3.1.16	1	0.1	2.3.1.16	-	-	-	1	0.1	2.3.1.16	1	0.1	-	-	-	-	-
Fatty acid biosynthesis	path:map00061	18	8	0.444444	1.1.1.100;1.3.1.9;2.3.1.39;2.3.1.41;2.3.1.86;3.1.2.14;4.2.1.59;6.2.1.3	9	0.5	1.1.1.100;1.3.1.9;2.3.1.39;2.3.1.41;2.3.1.86;3.1.2.14;4.2.1.59;6.2.1.3;6.4.1.2	8	0.444444	1.1.1.100;1.3.1.9;2.3.1.39;2.3.1.41;2.3.1.86;3.1.2.14;4.2.1.59;6.2.1.3	9	0.5	1.1.1.100;1.3.1.9;2.3.1.39;2.3.1.41;2.3.1.86;3.1.2.14;4.2.1.59;6.2.1.3;6.4.1.2	9	0.5	9	1	0.994936	1	1
Fatty acid degradation	path:map00071	30	8	0.266667	1.1.1.1;1.2.1.3;1.3.3.6;1.3.8.6;2.3.1.16;2.3.1.9;4.2.1.17;6.2.1.3	9	0.3	1.1.1.1;1.2.1.3;1.3.3.6;1.3.8.6;1.3.8.7;2.3.1.16;2.3.1.9;4.2.1.17;6.2.1.3	6	0.2	1.1.1.1;1.2.1.3;1.3.8.6;2.3.1.9;4.2.1.17;6.2.1.3	6	0.2	1.2.1.3;1.3.8.6;2.3.1.16;2.3.1.9;4.2.1.17;6.2.1.3	9	0.3	7	0.777778	0.989452	0.795867	0.5362
Fatty acid elongation	path:map00062	13	5	0.384615	1.3.1.38;2.3.1.16;2.3.1.199;4.2.1.134;4.2.1.17	4	0.307692	1.3.1.38;2.3.1.16;2.3.1.199;4.2.1.17	3	0.230769	1.3.1.38;2.3.1.199;4.2.1.17	4	0.307692	1.3.1.38;2.3.1.16;2.3.1.199;4.2.1.17	5	0.384615	4	0.8	0.938109	0.594256	0.411708
Folate biosynthesis	path:map00790	26	8	0.307692	1.5.1.3;2.5.1.15;2.7.6.3;3.5.4.16;4.1.2.25;4.1.99.18;4.2.3.12;6.3.2.17	6	0.230769	1.5.1.3;2.5.1.15;2.7.6.3;4.1.2.25;4.2.3.12;6.3.2.17	1	0.0384615	3.5.4.16	-	-	-	8	0.307692	1	0.125	0.729242	1	1
Fructose and mannose metabolism	path:map00051	74	12	0.162162	1.1.1.14;1.1.1.271;2.7.1.1;2.7.1.11;2.7.7.13;3.1.3.46;4.1.2.13;4.2.1.47;5.3.1.1;5.3.1.6;5.3.1.8;5.4.2.8	13	0.175676	1.1.1.14;1.1.1.271;2.7.1.1;2.7.1.11;2.7.7.13;3.1.3.11;3.1.3.46;4.1.2.13;4.2.1.47;5.3.1.1;5.3.1.6;5.3.1.8;5.4.2.8	8	0.108108	1.1.1.271;2.7.1.11;4.1.2.13;4.2.1.47;5.3.1.1;5.3.1.6;5.3.1.8;5.4.2.8	9	0.121622	1.1.1.271;2.7.1.1;2.7.1.11;4.1.2.13;4.2.1.47;5.3.1.1;5.3.1.6;5.3.1.8;5.4.2.8	13	0.175676	9	0.692308	0.894133	0.900555	0.871223
Galactose metabolism	path:map00052	47	8	0.170213	2.7.1.1;2.7.1.11;2.7.1.6;2.7.7.12;2.7.7.9;5.1.3.2;5.1.3.3;5.4.2.2	9	0.191489	2.7.1.1;2.7.1.11;2.7.1.6;2.7.7.12;2.7.7.9;3.5.1.25;5.1.3.2;5.1.3.3;5.4.2.2	4	0.0851064	2.7.1.11;2.7.7.9;5.1.3.3;5.4.2.2	5	0.106383	2.7.1.1;2.7.1.11;2.7.7.9;5.1.3.2;5.4.2.2	9	0.191489	6	0.666667	0.626748	0.766679	0.812808
Geraniol degradation	path:map00281	15	3	0.2	2.3.1.16;4.1.3.4;4.2.1.17	3	0.2	2.3.1.16;4.1.3.4;4.2.1.17	1	0.0666667	4.2.1.17	2	0.133333	2.3.1.16;4.2.1.17	3	0.2	2	0.666667	0.927405	0.687778	0.559567
Glucosinolate biosynthesis	path:map00966	15	1	0.0666667	2.6.1.42	1	0.0666667	2.6.1.42	1	0.0666667	2.6.1.42	1	0.0666667	2.6.1.42	1	0.0666667	1	1	0.531078	0.687778	0.559567
Glutathione metabolism	path:map00480	42	14	0.333333	1.1.1.42;1.1.1.44;1.1.1.49;1.11.1.15;1.17.4.1;1.8.5.1;2.3.2.2;2.5.1.16;2.5.1.18;3.4.11.1;3.4.19.13;3.5.2.9;4.1.1.17;6.3.2.2	15	0.357143	1.1.1.42;1.1.1.44;1.1.1.49;1.11.1.15;1.17.4.1;1.8.1.7;1.8.5.1;2.3.2.2;2.5.1.16;2.5.1.18;3.4.11.1;3.4.19.13;3.5.2.9;4.1.1.17;6.3.2.2	12	0.285714	1.1.1.42;1.1.1.44;1.1.1.49;1.11.1.15;1.17.4.1;2.3.2.2;2.5.1.16;2.5.1.18;3.4.11.1;3.4.19.13;3.5.2.9;6.3.2.2	11	0.261905	1.1.1.42;1.1.1.44;1.1.1.49;1.11.1.15;1.17.4.1;1.8.1.7;2.3.2.2;2.5.1.16;3.4.19.13;3.5.2.9;6.3.2.2	15	0.357143	13	0.866667	0.554397	0.224761	0.674315
Glycerolipid metabolism	path:map00561	38	8	0.210526	1.2.1.3;2.3.1.158;2.3.1.20;2.3.1.51;2.7.1.29;2.7.1.30;3.1.1.3;3.1.3.4	7	0.184211	1.2.1.3;2.3.1.158;2.3.1.20;2.3.1.51;2.7.1.30;3.1.1.3;3.1.3.4	2	0.0526316	1.2.1.3;3.1.1.3	3	0.0789474	1.2.1.3;3.1.1.3;3.1.3.4	8	0.210526	3	0.375	0.203452	0.0158169	0.0449584
Glycerophospholipid metabolism	path:map00564	66	12	0.181818	1.1.1.8;2.1.1.17;2.1.1.71;2.3.1.51;2.7.1.82;2.7.7.14;2.7.7.41;2.7.8.8;3.1.1.5;3.1.3.4;3.1.4.4;4.1.1.65	11	0.166667	1.1.1.8;1.1.5.3;2.1.1.17;2.1.1.71;2.3.1.51;2.7.7.14;2.7.7.41;3.1.1.5;3.1.3.4;3.1.4.4;4.1.1.65	2	0.030303	2.7.8.8;3.1.4.4	3	0.0454545	1.1.5.3;3.1.3.4;3.1.4.4	13	0.19697	4	0.307692	0.998683	0.9467	0.873043
Glycine, serine and threonine metabolism	path:map00260	67	19	0.283582	1.1.1.1;1.1.1.3;1.1.1.95;1.2.1.11;1.4.4.2;1.8.1.4;2.1.2.1;2.1.2.10;2.3.1.37;2.6.1.52;2.7.1.39;2.7.2.4;2.7.8.8;3.1.3.3;4.2.1.20;4.2.1.22;4.2.3.1;4.3.1.17;4.3.1.19	17	0.253731	1.1.1.1;1.1.1.3;1.1.1.95;1.2.1.11;1.4.4.2;1.8.1.4;2.1.2.1;2.3.1.37;2.6.1.52;2.7.1.39;2.7.2.4;3.1.3.3;4.2.1.20;4.2.1.22;4.2.3.1;4.3.1.17;4.3.1.19	12	0.179104	1.1.1.1;1.1.1.3;1.1.1.95;1.2.1.11;1.4.4.2;1.8.1.4;2.1.2.1;2.6.1.52;2.7.8.8;4.2.1.22;4.2.3.1;4.3.1.17	10	0.149254	1.1.1.3;1.1.1.95;1.2.1.11;1.4.4.2;1.8.1.4;2.1.2.1;2.6.1.52;4.2.1.22;4.2.3.1;4.3.1.17	19	0.283582	12	0.631579	0.97564	0.999879	0.99823
Glycolysis / Gluconeogenesis	path:map00010	49	19	0.387755	1.1.1.1;1.1.1.27;1.2.1.12;1.2.1.3;1.2.4.1;1.8.1.4;2.3.1.12;2.7.1.1;2.7.1.11;2.7.1.40;2.7.2.3;4.1.1.49;4.1.2.13;4.2.1.11;5.1.3.3;5.3.1.1;5.3.1.9;5.4.2.2;6.2.1.1	21	0.428571	1.1.1.1;1.1.1.27;1.2.1.12;1.2.1.3;1.2.4.1;1.8.1.4;2.3.1.12;2.7.1.1;2.7.1.11;2.7.1.40;2.7.2.3;3.1.3.11;4.1.1.1;4.1.1.49;4.1.2.13;4.2.1.11;5.1.3.3;5.3.1.1;5.3.1.9;5.4.2.2;6.2.1.1	17	0.346939	1.1.1.1;1.2.1.12;1.2.1.3;1.2.4.1;1.8.1.4;2.3.1.12;2.7.1.11;2.7.1.40;2.7.2.3;4.1.1.49;4.1.2.13;4.2.1.11;5.1.3.3;5.3.1.1;5.3.1.9;5.4.2.2;6.2.1.1	17	0.346939	1.2.1.12;1.2.1.3;1.2.4.1;1.8.1.4;2.3.1.12;2.7.1.1;2.7.1.11;2.7.1.40;2.7.2.3;4.1.1.1;4.1.1.49;4.1.2.13;4.2.1.11;5.3.1.1;5.3.1.9;5.4.2.2;6.2.1.1	21	0.428571	19	0.904762	0.957399	0.946256	0.776957
Glyoxylate and dicarboxylate metabolism	path:map00630	73	10	0.136986	1.1.1.37;1.11.1.6;2.1.2.1;2.3.1.9;2.3.3.1;2.3.3.9;4.1.3.1;4.2.1.3;6.3.1.2;6.4.1.3	10	0.136986	1.1.1.37;1.11.1.6;2.1.2.1;2.3.1.9;2.3.3.1;2.3.3.9;4.1.3.1;4.2.1.3;6.3.1.2;6.4.1.3	6	0.0821918	1.1.1.37;2.1.2.1;2.3.1.9;2.3.3.1;2.3.3.9;6.3.1.2	7	0.0958904	1.1.1.37;2.1.2.1;2.3.1.9;2.3.3.1;2.3.3.9;4.2.1.3;6.3.1.2	10	0.136986	7	0.7	0.461964	0.470531	0.214335
Histidine metabolism	path:map00340	42	9	0.214286	1.1.1.23;1.2.1.3;2.4.2.17;2.6.1.9;3.1.3.15;3.5.4.19;3.6.1.31;4.2.1.19;5.3.1.16	9	0.214286	1.1.1.23;1.2.1.3;2.4.2.17;2.6.1.9;3.1.3.15;3.5.4.19;3.6.1.31;4.2.1.19;5.3.1.16	7	0.166667	1.1.1.23;1.2.1.3;2.4.2.17;3.1.3.15;3.5.4.19;3.6.1.31;4.2.1.19	7	0.166667	1.1.1.23;1.2.1.3;2.4.2.17;3.1.3.15;3.5.4.19;3.6.1.31;4.2.1.19	9	0.214286	7	0.777778	0.798438	0.23733	0.323207
Inositol phosphate metabolism	path:map00562	48	8	0.166667	1.2.1.18;2.7.1.137;2.7.1.150;2.7.1.67;3.1.3.25;3.1.3.36;5.3.1.1;5.5.1.4	9	0.1875	1.13.99.1;1.2.1.18;2.7.1.137;2.7.1.150;2.7.1.67;3.1.3.25;3.1.3.36;5.3.1.1;5.5.1.4	4	0.0833333	1.2.1.18;2.7.1.67;5.3.1.1;5.5.1.4	3	0.0625	1.2.1.18;5.3.1.1;5.5.1.4	9	0.1875	4	0.444444	0.938109	0.903636	0.807449
Isoquinoline alkaloid biosynthesis	path:map00950	56	1	0.0178571	2.6.1.1	1	0.0178571	2.6.1.1	1	0.0178571	2.6.1.1	1	0.0178571	2.6.1.1	1	0.0178571	1	1	0.531078	0.687778	1
Limonene and pinene degradation	path:map00903	23	2	0.0869565	1.2.1.3;4.2.1.17	2	0.0869565	1.2.1.3;4.2.1.17	2	0.0869565	1.2.1.3;4.2.1.17	2	0.0869565	1.2.1.3;4.2.1.17	2	0.0869565	2	1	0.703406	0.227247	0.11164
Lipoic acid metabolism	path:map00785	3	3	1	2.3.1.181;2.7.7.63;2.8.1.8	1	0.333333	2.8.1.8	-	-	-	-	-	-	3	1	-	-	-	-	-
Lysine biosynthesis	path:map00300	32	8	0.25	1.1.1.3;1.1.1.87;1.2.1.11;1.2.1.31;1.5.1.10;1.5.1.7;2.7.2.4;4.2.1.36	9	0.28125	1.1.1.3;1.1.1.87;1.2.1.11;1.2.1.31;1.5.1.10;1.5.1.7;2.3.3.14;2.7.2.4;4.2.1.36	6	0.1875	1.1.1.3;1.1.1.87;1.2.1.11;1.2.1.31;1.5.1.10;1.5.1.7	6	0.1875	1.1.1.3;1.1.1.87;1.2.1.11;1.2.1.31;1.5.1.10;1.5.1.7	9	0.28125	6	0.666667	0.713723	0.891211	0.945123
Lysine degradation	path:map00310	56	10	0.178571	1.2.1.3;1.2.1.31;1.2.4.2;1.3.8.6;1.5.1.10;1.5.1.7;2.1.1.43;2.3.1.61;2.3.1.9;4.2.1.17	10	0.178571	1.2.1.3;1.2.1.31;1.2.4.2;1.3.8.6;1.5.1.10;1.5.1.7;2.1.1.43;2.3.1.61;2.3.1.9;4.2.1.17	8	0.142857	1.2.1.3;1.2.1.31;1.2.4.2;1.3.8.6;1.5.1.10;1.5.1.7;2.3.1.9;4.2.1.17	8	0.142857	1.2.1.3;1.2.1.31;1.2.4.2;1.3.8.6;1.5.1.10;1.5.1.7;2.3.1.9;4.2.1.17	10	0.178571	8	0.8	0.656372	0.33971	0.292027
Metabolism of xenobiotics by cytochrome P450	path:map00980	12	2	0.166667	1.1.1.1;2.5.1.18	2	0.166667	1.1.1.1;2.5.1.18	2	0.166667	1.1.1.1;2.5.1.18	-	-	-	2	0.166667	2	1	0.927405	1	1
Methane metabolism	path:map00680	87	12	0.137931	1.1.1.284;1.1.1.37;1.1.1.95;2.1.2.1;2.6.1.52;2.7.1.11;2.7.1.29;3.1.2.12;3.1.3.3;4.1.2.13;4.2.1.11;6.2.1.1	10	0.114943	1.1.1.37;1.1.1.95;2.1.2.1;2.6.1.52;2.7.1.11;3.1.3.11;3.1.3.3;4.1.2.13;4.2.1.11;6.2.1.1	10	0.114943	1.1.1.284;1.1.1.37;1.1.1.95;2.1.2.1;2.6.1.52;2.7.1.11;3.1.2.12;4.1.2.13;4.2.1.11;6.2.1.1	8	0.091954	1.1.1.37;1.1.1.95;2.1.2.1;2.6.1.52;2.7.1.11;4.1.2.13;4.2.1.11;6.2.1.1	13	0.149425	10	0.769231	0.617773	0.988973	0.983703
Monobactam biosynthesis	path:map00261	14	3	0.214286	1.2.1.11;2.7.2.4;2.7.7.4	3	0.214286	1.2.1.11;2.7.2.4;2.7.7.4	2	0.142857	1.2.1.11;2.7.7.4	2	0.142857	1.2.1.11;2.7.7.4	3	0.214286	2	0.666667	0.531078	1	1
Naphthalene degradation	path:map00626	22	1	0.0454545	1.1.1.1	1	0.0454545	1.1.1.1	1	0.0454545	1.1.1.1	-	-	-	1	0.0454545	1	1	1	1	1
N-Glycan biosynthesis	path:map00510	34	11	0.323529	2.4.1.131;2.4.1.132;2.4.1.256;2.4.1.257;2.4.1.258;2.4.1.265;2.4.1.83;2.4.99.18;2.7.8.15;3.2.1.113;3.6.1.43	5	0.147059	2.4.1.267;2.4.1.83;2.4.99.18;2.7.8.15;3.2.1.113	1	0.0294118	2.4.99.18	1	0.0294118	2.4.99.18	12	0.352941	1	0.0833333	0.729242	1	1
Nicotinate and nicotinamide metabolism	path:map00760	56	8	0.142857	2.1.1.1;2.4.2.1;2.4.2.19;2.7.1.23;2.7.7.1;2.7.7.18;3.6.1.22;6.3.5.1	7	0.125	2.1.1.1;2.4.2.1;2.4.2.19;2.7.1.23;2.7.7.1;3.6.1.22;6.3.5.1	4	0.0714286	2.4.2.1;2.4.2.19;2.7.7.1;2.7.7.18	3	0.0535714	2.4.2.1;2.4.2.19;2.7.7.1	8	0.142857	4	0.5	0.87535	0.38857	0.211663
Nitrogen metabolism	path:map00910	36	2	0.0555556	4.2.1.104;6.3.1.2	3	0.0833333	1.4.1.3;4.2.1.1;6.3.1.2	1	0.0277778	6.3.1.2	2	0.0555556	4.2.1.1;6.3.1.2	4	0.111111	2	0.5	0.386239	0.0842568	0.0370332
Novobiocin biosynthesis	path:map00401	12	2	0.166667	2.6.1.1;2.6.1.9	2	0.166667	2.6.1.1;2.6.1.9	1	0.0833333	2.6.1.1	1	0.0833333	2.6.1.1	2	0.166667	1	0.5	0.531078	0.687778	1
One carbon pool by folate	path:map00670	24	13	0.541667	1.5.1.15;1.5.1.20;1.5.1.3;1.5.1.5;2.1.1.13;2.1.1.45;2.1.2.1;2.1.2.10;2.1.2.2;2.1.2.3;3.5.4.9;6.3.3.2;6.3.4.3	11	0.458333	1.5.1.15;1.5.1.20;1.5.1.3;1.5.1.5;2.1.1.13;2.1.1.45;2.1.2.1;2.1.2.2;2.1.2.3;3.5.4.9;6.3.4.3	4	0.166667	1.5.1.20;2.1.2.1;2.1.2.2;2.1.2.3	4	0.166667	1.5.1.20;2.1.2.1;2.1.2.2;2.1.2.3	13	0.541667	4	0.307692	0.588776	0.731381	0.873043
Other types of O-glycan biosynthesis	path:map00514	14	1	0.0714286	2.4.1.109	1	0.0714286	2.4.1.109	1	0.0714286	2.4.1.109	-	-	-	1	0.0714286	1	1	0.729242	1	1
Oxidative phosphorylation	path:map00190	11	8	0.727273	1.10.2.2;1.3.5.1;1.6.5.3;1.6.99.3;1.9.3.1;3.6.1.1;3.6.3.14;3.6.3.6	8	0.727273	1.10.2.2;1.3.5.1;1.6.5.3;1.6.99.3;1.9.3.1;3.6.1.1;3.6.3.14;3.6.3.6	4	0.363636	1.3.5.1;1.9.3.1;3.6.1.1;3.6.3.6	7	0.636364	1.10.2.2;1.3.5.1;1.6.5.3;1.6.99.3;3.6.1.1;3.6.3.14;3.6.3.6	8	0.727273	8	1	0.326846	0.0141412	0.188701
Pantothenate and CoA biosynthesis	path:map00770	31	10	0.322581	1.1.1.169;1.1.1.86;2.1.2.11;2.2.1.6;2.6.1.42;2.7.1.24;2.7.1.33;2.7.8.7;4.2.1.9;6.3.2.1	9	0.290323	1.1.1.169;1.1.1.86;2.1.2.11;2.2.1.6;2.6.1.42;2.7.1.24;2.7.1.33;2.7.8.7;4.2.1.9	5	0.16129	1.1.1.86;2.6.1.42;2.7.8.7;4.2.1.9;6.3.2.1	4	0.129032	1.1.1.86;2.6.1.42;2.7.8.7;4.2.1.9	10	0.322581	5	0.5	0.147353	0.53981	0.323207
Penicillin and cephalosporin biosynthesis	path:map00311	14	1	0.0714286	3.5.2.6	#N/A	#N/A	#N/A	-	-	-	-	-	-	1	0.0714286	-	-	-	-	-
Pentose and glucuronate interconversions	path:map00040	67	7	0.104478	1.1.1.14;1.1.1.22;1.1.1.9;1.2.1.3;2.7.7.9;3.1.1.11;5.1.3.1	7	0.104478	1.1.1.14;1.1.1.22;1.1.1.9;1.2.1.3;2.7.7.9;3.1.1.11;5.1.3.1	3	0.0447761	1.1.1.22;1.2.1.3;2.7.7.9	3	0.0447761	1.1.1.22;1.2.1.3;2.7.7.9	7	0.104478	3	0.428571	0.147353	0.23733	0.100118
Pentose phosphate pathway	path:map00030	54	13	0.240741	1.1.1.44;1.1.1.49;2.2.1.1;2.2.1.2;2.7.1.11;2.7.6.1;3.1.1.31;4.1.2.13;4.1.2.4;5.1.3.1;5.3.1.6;5.3.1.9;5.4.2.2	14	0.259259	1.1.1.44;1.1.1.49;2.2.1.1;2.2.1.2;2.7.1.11;2.7.6.1;3.1.1.31;3.1.3.11;4.1.2.13;4.1.2.4;5.1.3.1;5.3.1.6;5.3.1.9;5.4.2.2	11	0.203704	1.1.1.44;1.1.1.49;2.2.1.1;2.2.1.2;2.7.1.11;3.1.1.31;4.1.2.13;4.1.2.4;5.3.1.6;5.3.1.9;5.4.2.2	11	0.203704	1.1.1.44;1.1.1.49;2.2.1.1;2.2.1.2;2.7.1.11;3.1.1.31;4.1.2.13;4.1.2.4;5.3.1.6;5.3.1.9;5.4.2.2	14	0.259259	11	0.785714	0.554397	0.787375	0.988804
Peptidoglycan biosynthesis	path:map00550	20	1	0.05	2.5.1.7	1	0.05	2.5.1.7	-	-	-	-	-	-	1	0.05	-	-	-	-	-
Phenylalanine metabolism	path:map00360	71	5	0.0704225	1.13.11.27;1.14.16.1;2.6.1.1;2.6.1.9;4.2.1.17	5	0.0704225	1.13.11.27;1.14.16.1;2.6.1.1;2.6.1.9;4.2.1.17	2	0.028169	2.6.1.1;4.2.1.17	2	0.028169	2.6.1.1;4.2.1.17	5	0.0704225	2	0.4	0.820757	0.826291	1
Phenylalanine, tyrosine and tryptophan biosynthesis	path:map00400	43	16	0.372093	1.1.1.25;1.14.16.1;2.4.2.18;2.5.1.19;2.5.1.54;2.6.1.1;2.6.1.9;2.7.1.71;4.1.1.48;4.1.3.27;4.2.1.10;4.2.1.20;4.2.3.4;4.2.3.5;5.3.1.24;5.4.99.5	16	0.372093	1.1.1.25;1.14.16.1;2.4.2.18;2.5.1.19;2.5.1.54;2.6.1.1;2.6.1.9;2.7.1.71;4.1.1.48;4.1.3.27;4.2.1.10;4.2.1.20;4.2.3.4;4.2.3.5;5.3.1.24;5.4.99.5	10	0.232558	1.1.1.25;2.5.1.19;2.6.1.1;2.7.1.71;4.1.1.48;4.1.3.27;4.2.1.10;4.2.3.4;4.2.3.5;5.3.1.24	10	0.232558	1.1.1.25;2.5.1.19;2.6.1.1;2.7.1.71;4.1.1.48;4.1.3.27;4.2.1.10;4.2.3.4;4.2.3.5;5.3.1.24	16	0.372093	10	0.625	0.588776	0.9467	1
Phosphonate and phosphinate metabolism	path:map00440	22	1	0.0454545	2.7.7.14	1	0.0454545	2.7.7.14	-	-	-	-	-	-	1	0.0454545	-	-	-	-	-
Photosynthesis	path:map00195	3	1	0.333333	3.6.3.14	1	0.333333	3.6.3.14	-	-	-	1	0.333333	3.6.3.14	1	0.333333	-	-	-	-	-
Porphyrin and chlorophyll metabolism	path:map00860	83	10	0.120482	1.16.3.1;1.3.3.3;2.1.1.107;2.3.1.37;2.5.1.61;4.1.1.37;4.2.1.24;4.4.1.17;4.99.1.1;6.1.1.17	9	0.108434	1.16.3.1;1.3.3.3;2.1.1.107;2.3.1.37;2.5.1.61;4.1.1.37;4.2.1.24;4.99.1.1;6.1.1.17	4	0.0481928	1.3.3.3;2.5.1.61;4.1.1.37;4.2.1.24	5	0.060241	1.16.3.1;1.3.3.3;2.5.1.61;4.1.1.37;4.2.1.24	10	0.120482	5	0.5	0.713723	0.891211	0.744421
Propanoate metabolism	path:map00640	56	11	0.196429	1.1.1.27;1.2.1.18;1.2.1.27;1.2.4.4;1.8.1.4;2.3.1.9;2.6.1.19;3.1.2.4;4.2.1.17;6.2.1.1;6.4.1.3	14	0.25	1.1.1.27;1.2.1.18;1.2.1.27;1.2.4.4;1.3.8.7;1.8.1.4;2.3.1.9;2.6.1.19;3.1.2.4;4.2.1.17;6.2.1.1;6.2.1.5;6.4.1.2;6.4.1.3	8	0.142857	1.2.1.18;1.2.1.27;1.8.1.4;2.3.1.9;2.6.1.19;3.1.2.4;4.2.1.17;6.2.1.1	10	0.178571	1.2.1.18;1.2.1.27;1.8.1.4;2.3.1.9;2.6.1.19;3.1.2.4;4.2.1.17;6.2.1.1;6.2.1.5;6.4.1.2	14	0.25	10	0.714286	0.973283	0.893698	0.710821
Purine metabolism	path:map00230	112	32	0.285714	1.1.1.205;1.17.4.1;1.7.3.3;2.1.2.2;2.1.2.3;2.4.2.1;2.4.2.7;2.4.2.8;2.7.1.20;2.7.1.25;2.7.1.40;2.7.4.3;2.7.4.6;2.7.4.8;2.7.6.1;2.7.7.4;2.7.7.6;2.7.7.7;3.5.1.5;3.5.2.5;3.5.4.10;3.5.4.6;3.6.1.19;4.1.1.21;4.3.2.2;5.4.2.2;6.3.2.6;6.3.3.1;6.3.4.13;6.3.4.4;6.3.5.2;6.3.5.3	33	0.294643	1.1.1.205;1.17.4.1;1.7.3.3;2.1.2.2;2.1.2.3;2.4.2.1;2.4.2.14;2.4.2.7;2.7.1.20;2.7.1.25;2.7.1.40;2.7.4.3;2.7.4.6;2.7.4.8;2.7.6.1;2.7.7.4;2.7.7.6;2.7.7.7;3.5.1.5;3.5.2.17;3.5.2.5;3.5.3.4;3.5.4.10;3.5.4.6;3.6.1.19;4.3.2.2;5.4.2.2;6.3.2.6;6.3.3.1;6.3.4.13;6.3.4.4;6.3.5.2;6.3.5.3	26	0.232143	1.1.1.205;1.17.4.1;1.7.3.3;2.1.2.2;2.1.2.3;2.4.2.1;2.4.2.7;2.4.2.8;2.7.1.20;2.7.1.25;2.7.1.40;2.7.4.3;2.7.4.6;2.7.7.4;3.5.1.5;3.5.2.5;3.5.4.10;4.1.1.21;4.3.2.2;5.4.2.2;6.3.2.6;6.3.3.1;6.3.4.13;6.3.4.4;6.3.5.2;6.3.5.3	26	0.232143	1.1.1.205;1.17.4.1;1.7.3.3;2.1.2.2;2.1.2.3;2.4.2.1;2.4.2.7;2.7.1.20;2.7.1.25;2.7.1.40;2.7.4.3;2.7.4.6;2.7.7.4;2.7.7.6;3.5.1.5;3.5.2.5;3.5.3.4;3.5.4.10;4.3.2.2;5.4.2.2;6.3.2.6;6.3.3.1;6.3.4.13;6.3.4.4;6.3.5.2;6.3.5.3	35	0.3125	28	0.8	0.318458	0.0989479	0.136822
Pyrimidine metabolism	path:map00240	65	21	0.323077	1.17.4.1;1.3.98.1;1.8.1.9;2.1.1.45;2.1.3.2;2.4.2.1;2.4.2.10;2.4.2.9;2.7.1.48;2.7.4.6;2.7.4.9;2.7.7.6;2.7.7.7;3.5.2.3;3.5.4.12;3.5.4.5;3.6.1.19;3.6.1.23;4.1.1.23;6.3.4.2;6.3.5.5	19	0.292308	1.17.4.1;1.3.98.1;1.8.1.9;2.1.1.45;2.1.3.2;2.4.2.1;2.4.2.10;2.4.2.9;2.7.1.48;2.7.4.6;2.7.7.6;2.7.7.7;3.5.2.3;3.5.4.5;3.6.1.19;3.6.1.23;4.1.1.23;6.3.4.2;6.3.5.5	9	0.138462	1.17.4.1;1.3.98.1;1.8.1.9;2.1.3.2;2.4.2.1;2.4.2.9;2.7.4.6;3.5.2.3;3.5.4.5	11	0.169231	1.17.4.1;1.3.98.1;1.8.1.9;2.1.3.2;2.4.2.1;2.4.2.9;2.7.4.6;2.7.7.6;3.5.2.3;3.5.4.5;6.3.5.5	21	0.323077	11	0.52381	0.26728	0.0564325	0.242762
Pyruvate metabolism	path:map00620	68	18	0.264706	1.1.1.27;1.1.1.37;1.1.2.4;1.2.1.3;1.2.4.1;1.8.1.4;2.3.1.12;2.3.1.9;2.3.3.13;2.3.3.9;2.7.1.40;3.1.2.1;3.1.2.6;4.1.1.49;4.2.1.2;4.4.1.5;6.2.1.1;6.4.1.1	19	0.279412	1.1.1.27;1.1.1.37;1.1.2.4;1.2.1.3;1.2.4.1;1.8.1.4;2.3.1.12;2.3.1.9;2.3.3.13;2.3.3.14;2.3.3.9;2.7.1.40;3.1.2.1;4.1.1.49;4.2.1.2;4.4.1.5;6.2.1.1;6.4.1.1;6.4.1.2	14	0.205882	1.1.1.37;1.2.1.3;1.2.4.1;1.8.1.4;2.3.1.12;2.3.1.9;2.3.3.9;2.7.1.40;3.1.2.1;3.1.2.6;4.1.1.49;4.2.1.2;6.2.1.1;6.4.1.1	14	0.205882	1.1.1.37;1.2.1.3;1.2.4.1;1.8.1.4;2.3.1.12;2.3.1.9;2.3.3.9;2.7.1.40;3.1.2.1;4.1.1.49;4.2.1.2;6.2.1.1;6.4.1.1;6.4.1.2	20	0.294118	15	0.75	0.565298	0.432898	0.101834
Retinol metabolism	path:map00830	16	1	0.0625	1.1.1.1	1	0.0625	1.1.1.1	1	0.0625	1.1.1.1	-	-	-	1	0.0625	1	1	1	1	1
Riboflavin metabolism	path:map00740	24	6	0.25	2.5.1.78;2.5.1.9;2.7.1.26;3.5.4.25;3.5.4.26;4.1.99.12	5	0.208333	2.5.1.78;2.5.1.9;2.7.1.26;3.5.4.25;4.1.99.12	2	0.0833333	2.5.1.78;2.5.1.9	2	0.0833333	2.5.1.78;2.5.1.9	6	0.25	2	0.333333	0.531078	1	1
Selenocompound metabolism	path:map00450	20	7	0.35	1.8.1.9;2.1.1.13;2.1.1.14;2.5.1.48;2.7.7.4;4.4.1.8;6.1.1.10	7	0.35	1.8.1.9;2.1.1.13;2.1.1.14;2.5.1.48;2.7.7.4;4.4.1.8;6.1.1.10	2	0.1	1.8.1.9;2.7.7.4	3	0.15	1.8.1.9;2.1.1.14;2.7.7.4	7	0.35	3	0.428571	0.280517	1	1
Sesquiterpenoid and triterpenoid biosynthesis	path:map00909	80	1	0.0125	2.5.1.21	1	0.0125	2.5.1.21	-	-	-	-	-	-	1	0.0125	-	-	-	-	-
Sphingolipid metabolism	path:map00600	31	4	0.129032	1.1.1.102;2.3.1.50;3.1.3.4;4.1.2.27	4	0.129032	1.1.1.102;2.3.1.50;3.1.3.4;4.1.2.27	1	0.0322581	1.1.1.102	2	0.0645161	1.1.1.102;3.1.3.4	4	0.129032	2	0.5	0.531078	0.687778	0.559567
Starch and sucrose metabolism	path:map00500	76	15	0.197368	1.1.1.22;2.4.1.1;2.4.1.11;2.4.1.15;2.4.1.18;2.7.1.1;2.7.7.9;3.1.1.11;3.1.3.12;3.2.1.28;3.2.1.3;3.2.1.4;4.1.1.35;5.3.1.9;5.4.2.2	17	0.223684	1.1.1.22;2.4.1.1;2.4.1.11;2.4.1.15;2.4.1.18;2.7.1.1;2.7.7.9;3.1.1.11;3.1.3.12;3.2.1.21;3.2.1.28;3.2.1.3;3.2.1.4;3.2.1.58;4.1.1.35;5.3.1.9;5.4.2.2	9	0.118421	1.1.1.22;2.4.1.1;2.4.1.15;2.7.7.9;3.2.1.3;3.2.1.4;4.1.1.35;5.3.1.9;5.4.2.2	11	0.144737	1.1.1.22;2.4.1.1;2.4.1.15;2.7.1.1;2.7.7.9;3.1.3.12;3.2.1.3;3.2.1.4;4.1.1.35;5.3.1.9;5.4.2.2	17	0.223684	11	0.647059	0.742925	0.900555	0.871223
Steroid biosynthesis	path:map00100	23	4	0.173913	1.14.13.70;1.14.13.72;2.1.1.41;2.5.1.21	4	0.173913	1.14.13.70;1.14.13.72;2.1.1.41;2.5.1.21	2	0.0869565	1.14.13.70;1.14.13.72	3	0.130435	1.14.13.70;1.14.13.72;2.1.1.41	4	0.173913	3	0.75	0.280517	1	1
Streptomycin biosynthesis	path:map00521	18	4	0.222222	2.7.1.1;3.1.3.25;5.4.2.2;5.5.1.4	5	0.277778	2.7.1.1;3.1.3.25;4.2.1.46;5.4.2.2;5.5.1.4	2	0.111111	5.4.2.2;5.5.1.4	3	0.166667	2.7.1.1;5.4.2.2;5.5.1.4	5	0.277778	3	0.6	1	1	1
Styrene degradation	path:map00643	20	2	0.1	1.13.11.5;3.7.1.2	2	0.1	1.13.11.5;3.7.1.2	2	0.1	1.13.11.5;3.7.1.2	2	0.1	1.13.11.5;3.7.1.2	2	0.1	2	1	0.531078	0.193088	0.111913
Sulfur metabolism	path:map00920	45	7	0.155556	1.8.1.2;2.5.1.47;2.5.1.48;2.7.1.25;2.7.7.4;2.8.1.1;3.1.3.7	8	0.177778	1.8.1.2;1.8.4.8;2.5.1.47;2.5.1.48;2.7.1.25;2.7.7.4;2.8.1.1;3.1.3.7	4	0.0888889	2.5.1.47;2.7.1.25;2.7.7.4;3.1.3.7	4	0.0888889	2.5.1.47;2.7.1.25;2.7.7.4;3.1.3.7	8	0.177778	4	0.5	0.938109	1	1
Synthesis and degradation of ketone bodies	path:map00072	6	3	0.5	2.3.1.9;2.3.3.10;4.1.3.4	3	0.5	2.3.1.9;2.3.3.10;4.1.3.4	2	0.333333	2.3.1.9;2.3.3.10	2	0.333333	2.3.1.9;2.3.3.10	3	0.5	2	0.666667	0.820757	1	1
Taurine and hypotaurine metabolism	path:map00430	20	2	0.1	2.3.2.2;4.1.1.15	3	0.15	1.13.11.20;2.3.2.2;4.1.1.15	2	0.1	2.3.2.2;4.1.1.15	2	0.1	2.3.2.2;4.1.1.15	3	0.15	2	0.666667	0.280517	0.0365933	0.0121642
Terpenoid backbone biosynthesis	path:map00900	50	13	0.26	1.1.1.34;2.1.1.100;2.3.1.9;2.3.3.10;2.5.1.1;2.5.1.10;2.5.1.29;2.5.1.58;2.5.1.91;2.7.1.36;3.4.24.84;4.1.1.33;5.3.3.2	11	0.22	1.1.1.34;2.3.1.9;2.3.3.10;2.5.1.1;2.5.1.10;2.5.1.29;2.5.1.58;2.5.1.91;3.4.24.84;4.1.1.33;5.3.3.2	6	0.12	2.3.1.9;2.3.3.10;2.5.1.1;2.5.1.10;3.4.24.84;4.1.1.33	6	0.12	2.3.1.9;2.3.3.10;2.5.1.1;2.5.1.10;3.4.24.84;4.1.1.33	13	0.26	6	0.461538	0.952261	1	1
Thiamine metabolism	path:map00730	21	6	0.285714	2.5.1.3;2.7.1.49;2.7.1.50;2.7.4.7;2.7.6.2;2.8.1.7	5	0.238095	2.5.1.3;2.7.1.49;2.7.1.50;2.7.4.7;2.8.1.7	4	0.190476	2.5.1.3;2.7.1.49;2.7.1.50;2.7.4.7	4	0.190476	2.5.1.3;2.7.1.49;2.7.1.50;2.7.4.7	6	0.285714	4	0.666667	0.927405	0.687778	0.559567
Tropane, piperidine and pyridine alkaloid biosynthesis	path:map00960	30	2	0.0666667	2.6.1.1;2.6.1.9	2	0.0666667	2.6.1.1;2.6.1.9	1	0.0333333	2.6.1.1	1	0.0333333	2.6.1.1	2	0.0666667	1	0.5	0.531078	0.687778	1
Tryptophan metabolism	path:map00380	71	9	0.126761	1.11.1.6;1.13.11.6;1.14.13.9;1.2.1.3;1.2.4.2;1.3.8.6;2.3.1.9;3.7.1.3;4.2.1.17	8	0.112676	1.11.1.6;1.13.11.6;1.2.1.3;1.2.4.2;1.3.8.6;2.3.1.9;3.7.1.3;4.2.1.17	7	0.0985915	1.13.11.6;1.2.1.3;1.2.4.2;1.3.8.6;2.3.1.9;3.7.1.3;4.2.1.17	7	0.0985915	1.13.11.6;1.2.1.3;1.2.4.2;1.3.8.6;2.3.1.9;3.7.1.3;4.2.1.17	9	0.126761	7	0.777778	0.973283	0.717206	0.44741
Tyrosine metabolism	path:map00350	68	6	0.0882353	1.1.1.1;1.13.11.27;1.13.11.5;2.6.1.1;2.6.1.9;3.7.1.2	6	0.0882353	1.1.1.1;1.13.11.27;1.13.11.5;2.6.1.1;2.6.1.9;3.7.1.2	4	0.0588235	1.1.1.1;1.13.11.5;2.6.1.1;3.7.1.2	3	0.0441176	1.13.11.5;2.6.1.1;3.7.1.2	6	0.0882353	4	0.666667	0.588776	0.38857	0.545071
Ubiquinone and other terpenoid-quinone biosynthesis	path:map00130	43	6	0.139535	1.13.11.27;2.1.1.163;2.1.1.201;2.1.1.222;2.1.1.64;2.5.1.39	4	0.0930233	1.13.11.27;2.1.1.163;2.1.1.201;2.5.1.39	-	-	-	-	-	-	6	0.139535	-	-	-	-	-
Valine, leucine and isoleucine biosynthesis	path:map00290	14	8	0.571429	1.1.1.85;1.1.1.86;2.2.1.6;2.3.3.13;2.6.1.42;4.2.1.33;4.2.1.9;4.3.1.19	8	0.571429	1.1.1.85;1.1.1.86;2.2.1.6;2.3.3.13;2.6.1.42;4.2.1.33;4.2.1.9;4.3.1.19	4	0.285714	1.1.1.85;1.1.1.86;2.6.1.42;4.2.1.9	4	0.285714	1.1.1.85;1.1.1.86;2.6.1.42;4.2.1.9	8	0.571429	4	0.5	0.203452	0.38857	0.211663
Valine, leucine and isoleucine degradation	path:map00280	38	15	0.394737	1.1.1.31;1.2.1.27;1.2.1.3;1.2.4.4;1.3.8.4;1.8.1.4;2.3.1.16;2.3.1.9;2.3.3.10;2.6.1.42;3.1.2.4;4.1.3.4;4.2.1.17;6.4.1.3;6.4.1.4	16	0.421053	1.1.1.31;1.2.1.27;1.2.1.3;1.2.4.4;1.3.8.4;1.3.8.7;1.8.1.4;2.3.1.16;2.3.1.9;2.3.3.10;2.6.1.42;3.1.2.4;4.1.3.4;4.2.1.17;6.4.1.3;6.4.1.4	9	0.236842	1.2.1.27;1.2.1.3;1.8.1.4;2.3.1.9;2.3.3.10;2.6.1.42;3.1.2.4;4.2.1.17;6.4.1.4	10	0.263158	1.2.1.27;1.2.1.3;1.8.1.4;2.3.1.16;2.3.1.9;2.3.3.10;2.6.1.42;3.1.2.4;4.2.1.17;6.4.1.4	16	0.421053	10	0.625	0.44627	0.22977	0.0551977
Various types of N-glycan biosynthesis	path:map00513	25	6	0.24	2.4.1.131;2.4.1.132;2.4.1.257;2.4.1.258;2.4.99.18;3.2.1.113	3	0.12	2.4.99.18;3.2.1.113;3.2.1.52	1	0.04	2.4.99.18	1	0.04	2.4.99.18	7	0.28	1	0.142857	0.729242	1	1
Vitamin B6 metabolism	path:map00750	26	3	0.115385	2.6.1.52;2.7.1.35;4.2.3.1	2	0.0769231	2.6.1.52;4.2.3.1	3	0.115385	2.6.1.52;2.7.1.35;4.2.3.1	2	0.0769231	2.6.1.52;4.2.3.1	3	0.115385	3	1	0.820757	0.826291	0.708513
Zeatin biosynthesis	path:map00908	11	1	0.0909091	2.5.1.75	1	0.0909091	2.5.1.75	-	-	-	-	-	-	1	0.0909091	-	-	-	-	-
